# Supplementary material
Source: publisher figshare collection journal article supplement (https://acs.figshare.com/ndownloader/files/4346632)

## Supporting Information

### Diversity-Oriented Approach to Pyrrole-imidazole Alkaloid Frameworks

**Manojkumar R. Bhandari<sup>†</sup>, Muhammed Yousufuddin<sup>‡</sup> and  
Carl J. Lovely<sup>†,\*</sup>**

*Department of Chemistry and Biochemistry, The University of Texas at  
Arlington, Arlington, TX 76019, <sup>†</sup> Center for Nanostructured Materials,  
The University of Texas at Arlington, Arlington, TX 76019 <sup>‡</sup>*

1. Experimental procedures for the preparation of compounds **11-18**, **23-29**, S2-S17.
2. Plots of X-ray structures for compounds **16**, **18**, **24**, **25**, **27** and **28**, S18-S23.
3. <sup>1</sup>H NMR and <sup>13</sup>C NMR spectra of compounds **11-18**, **23-29** and precursors, S24-S71

**General Considerations:** All reagents were purchased from commercial suppliers and were used as received unless otherwise noted. All reactions involving air- or water-sensitive compounds were conducted in oven-dried glassware under an atmosphere of dry argon or nitrogen.  $^1\text{H}$  and  $^{13}\text{C}$  NMR ( $\delta$  in ppm) spectra were recorded in  $\text{CDCl}_3$  (unless otherwise noted) at 500 and 125 MHz, respectively; using a JEOL Eclipse+ 500 spectrometer unless otherwise noted using residual  $\text{CHCl}_3$  as reference. Infrared spectra were recorded either as solids or films for oil or liquids using Bruker Alpha spectrometer (ATR spectroscopy). High resolution mass spectra (HR-MS) were obtained by Dr. Powell through the mass spectrometry service at the University of Florida, Gainesville, Florida.

**4-(3-Hydroxyprop-1-ynyl)-*N,N*-dimethyl-1H-imidazole-1-sulfonamide (**S1**):**

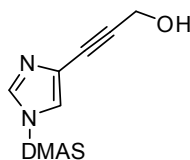

$\text{N}_2$  was bubbled through solution of 4-iodoimidazole (8.00 g, 26.4 mmol), propargyl alcohol (2.22 g, 39.6 mmol),  $\text{Pd}(\text{PPh}_3)_2\text{Cl}_2$  (463 mg, 0.66 mmol),  $\text{CuI}$  (251 mg, 1.32 mmol) in THF/TEA (120 mL/120 mL). The reaction mixture was heated at 60 °C for overnight. The reaction mixture was concentrated, the residue was preabsorbed on silica gel by dissolving it in methanol and purified by chromatography ( $\text{EtOAc} \rightarrow \text{EtOAc/MeOH}$ , 98:2) providing **S1** (4.37 g, 72%) as a white solid; m.p. 129-131 °C;  $^1\text{H}$  NMR (300 MHz):  $\delta$  = 7.84 (s, 1H), 7.37 (s, 1H), 4.48 (d,  $J$  = 6.2 Hz, 2H), 2.86 (s, 6H), 2.79 (t,  $J$  = 6.2 Hz, 1H);  $^{13}\text{C}$  NMR (75 MHz):  $\delta$  = 136.6, 125.6, 120.9, 89.8, 77.3, 51.3, 38.3; IR (neat,  $\text{cm}^{-1}$ ): 3242, 3150, 3122, 2927, 2222, 1685, 1548, 1386, 1266, 1170, 1087, 1030, 958, 843, 722; HR-ESIMS ( $m/z$ ):

Calcd. for  $C_8H_{12}N_3O_3S$   $[M+H]^+$  230.0593, found 230.0591; Calcd. for  $C_8H_{11}N_3O_3SNa$   $[M+Na]^+$  252.0413, found 252.0407.

**4-(3-Azidoprop-1-ynyl)-*N,N*-dimethyl-1H-imidazole-1-sulfonamide (S2):**

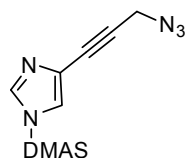

cooled solution of the alcohol **S1** (1.50 g, 6.55 mmol) in dry THF (50 mL), diphenyl phosphoryl azide (1.70 mL, 7.86 mmol) followed by DBU (1.17 mL, 7.86 mmol) was added dropwise. The solution was allowed to warm to r.t. and stirred overnight. The reaction mixture was partitioned between  $NH_4Cl$  solution and extracted with EtOAc. The organic layer was washed with brine solution, dried ( $Na_2SO_4$ ), and concentrated to give brown solids. These solids were purified by flash chromatography providing azide **S2** (1.56 g, 94%) as a brown solid; m.p 75-76 °C;  $^1H$  NMR (300 MHz):  $\delta$  = 7.81 (s, 1H), 7.40 (s, 1H), 4.11 (s, 2H), 2.86 (s, 6H);  $^{13}C$  (75 MHz) NMR:  $\delta$  = 136.7, 125.0, 121.5, 83.4, 79.2, 40.5, 38.3; IR (neat,  $cm^{-1}$ ): 3132, 3114, 2920, 2114, 2070, 1466, 1392, 1268, 1181, 1088, 963, 854, 719; HR-ESIMS ( $m/z$ ): Calcd. for  $C_8H_{11}N_6O_2S$   $[M+H]^+$  255.0659, found 255.0661; Calcd. for  $C_8H_{10}N_6O_2SNa$   $[M+Na]^+$  277.0478, found 277.0490.

**4-(3-Aminoprop-1-ynyl)-*N,N*-dimethyl-1H-imidazole-1-sulfonamide (S3):**

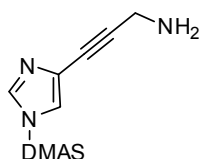

$PPh_3$  (1.62 g, 6.19 mmol) was added to the solution of azide **S2** (1.05 g, 4.13 mmol) in dry THF (40 mL) and stirred for 4 h.  $H_2O$  (3 mL) was added to above solution and stirred overnight. The reaction mixture was concentrated purified on silica gel (EtOAc $\rightarrow$ EtOAc/MeOH/ $Et_3N$ , 70:25:5) to obtain

amine **S3** (819 mg, 87%) as a thick oil.  $^1\text{H}$  NMR (300 MHz):  $\delta$  = 7.79 (d,  $J$  = 1.1 Hz, 1H), 7.30 (d,  $J$  = 1.1 Hz, 1H), 3.61 (s, 2H), 2.84 (s, 6H), 1.56 (brs, 2H);  $^{13}\text{C}$  NMR (75 MHz):  $\delta$  = 136.5, 126.1, 120.2, 92.3, 74.5, 38.3, 32.2; IR (neat,  $\text{cm}^{-1}$ ): 3369, 3303, 3126, 2923, 2233, 1671, 1602, 1541, 1387, 1325, 1170, 1085, 960, 723; HR-ESIMS ( $m/z$ ): Calcd. for  $\text{C}_8\text{H}_{13}\text{N}_4\text{O}_2\text{S}$   $[\text{M}+\text{H}]^+$  229.0754, found 229.0747; Calcd. for  $\text{C}_8\text{H}_{12}\text{N}_4\text{O}_2\text{SNa}$   $[\text{M}+\text{Na}]^+$  251.0573, found 251.0566.

***N*-(3-(1-(*N,N*-Dimethylsulfamoyl)-1H-imidazol-4-yl)prop-2-ynyl)-1H-pyrrole-2-**

**carboxamide (11):** A mixture of amine **S3** (750 mg, 3.28 mmol), trichloroacetyl pyrrole

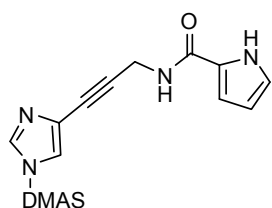

derivative (905 mg, 4.26 mmol) and  $\text{K}_2\text{CO}_3$  (587 mg, 4.26 mmol) in

dry DMF (12 mL) was stirred at r.t. overnight. To the resulting

mixture was added half saturated  $\text{NH}_4\text{Cl}$  solution and the aqueous

layer was repeatedly extracted with EtOAc. The organic extracts were combined,

washed with brine solution, dried ( $\text{Na}_2\text{SO}_4$ ), concentrated and purified on silica gel

( $\text{CH}_2\text{Cl}_2 \rightarrow$  hexane/EtOAc, 20:80) to give amide **11** (916 mg, 87%) as a white solid; m.p

179-182  $^\circ\text{C}$ ;  $^1\text{H}$  NMR (300 MHz,  $\text{DMSO}-d_6$ ):  $\delta$  = 11.49 (s, 1H), 8.50 (t,  $J$  = 5.6 Hz, 1H),

8.16 (d,  $J$  = 1.4 Hz, 1H), 7.91 (d,  $J$  = 1.4 Hz, 1H), 6.86-6.83 (m, 1H), 6.79-6.76 (m, 1H),

6.07-6.04 (m, 1H), 4.22 (d,  $J$  = 5.6 Hz, 2H), 2.78 (s, 6H);  $^{13}\text{C}$  NMR (75 MHz):  $\delta$  = 160.9,

137.8, 126.2, 125.1, 122.3, 122.2, 110.9, 109.2, 89.1, 74.9, 38.3, 28.9; IR (neat,  $\text{cm}^{-1}$ ):

3236, 3140, 3049, 1620, 1563, 1421, 1390, 1261, 1178, 1088, 1037, 964, 837, 769,

725; HR-ESIMS ( $m/z$ ): Calcd. for  $\text{C}_{13}\text{H}_{16}\text{N}_5\text{O}_3\text{S}$   $[\text{M}+\text{H}]^+$  322.0968, found 322.0969;

Calcd. for  $\text{C}_{13}\text{H}_{15}\text{N}_5\text{O}_3\text{SNa}$   $[\text{M}+\text{Na}]^+$  344.0788, found 344.0804.

**(Z)-4-((2-(1H-Pyrrol-2-yl)oxazol-5(4H)-ylidene)methyl)-N,N-dimethyl-1H-imidazole-**

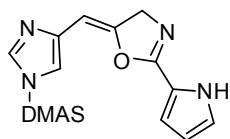

**1-sulfonamide (14):** Pd(OAc)<sub>2</sub> (1.98 mg, 0.02 mmol) was added to the solution of amide **11** (100 mg, 0.31 mmol) in CH<sub>2</sub>Cl<sub>2</sub>/TFA (1.5 mL/1 mL) and stirred for 1 h. After the starting material was

consumed, the reaction mixture was concentrated and partitioned between half saturated NaHCO<sub>3</sub> solution and EtOAc. The organic layer was dried (Na<sub>2</sub>SO<sub>4</sub>), concentrated and purified by column chromatography (hexane/EtOAc, 20:80) providing oxazole **14** (87 mg, 87%) as a yellowish powder; m.p 193-195 °C; <sup>1</sup>H NMR (300 MHz, DMSO-d<sub>6</sub>): δ = 11.98 (s, 1H), 8.12 (d, *J* = 1.0 Hz, 1H), 7.59 (s, 1H), 7.05-7.02 (m, 1H), 6.71-6.69 (m, 1H), 6.22-6.19 (m, 1H), 5.73 (t, *J* = 2.2 Hz, 1H), 4.73 (d, *J* = 2.2 Hz, 2H), 2.82 (s, 6H); <sup>13</sup>C NMR (75 MHz): δ = 156.9, 153.0, 137.1, 137.0, 124.2, 118.7, 114.9, 113.4, 109.9, 93.0, 58.2, 38.4; IR (neat, cm<sup>-1</sup>): 3168, 3143, 2972, 1714, 1667, 1430, 1393, 1153, 1091, 991, 946, 803, 729; HR-ESIMS (*m/z*): Calcd. for C<sub>13</sub>H<sub>16</sub>N<sub>5</sub>O<sub>3</sub>S [M+H]<sup>+</sup> 322.0968, found 322.0967; Calcd. for C<sub>13</sub>H<sub>15</sub>N<sub>5</sub>O<sub>3</sub>SNa [M+Na]<sup>+</sup> 344.0788, found 344.0794.

**N-Tritylprop-2-yn-1-amine (S4):** To a solution of propargyl amine (14.78 g, 0.269 mol)

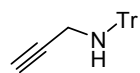

in dry CH<sub>2</sub>Cl<sub>2</sub> (100 mL), the solution of trityl chloride (35.80 g, 0.128 mol) in CH<sub>2</sub>Cl<sub>2</sub> (75 mL) was added dropwise at 0 °C. the solution was stirred at r.t.

overnight. The reaction mixture was partitioned with water (50 mL), and the organic layer was washed with brine, dried (Na<sub>2</sub>SO<sub>4</sub>) and concentrated. The residue was crystallized from hexane to give **S4** (34.65 g, 91%) as a white solid; m.p 73-75 °C; <sup>1</sup>H NMR: δ = 7.52-7.50 (m, 6H), 7.32-7.29 (m, 6H), 7.23-7.21 (m, 3H), 2.97 (s, 2H), 2.20 (t,

$J = 2.5$  Hz, 1H), 2.02 (brs, 1H);  $^{13}\text{C}$  NMR:  $\delta = 145.3, 128.7, 128.1, 126.7, 82.8, 71.1, 70.8, 33.7$ ; IR (neat,  $\text{cm}^{-1}$ ): 3326, 3289, 3278, 3054, 2840, 2125, 1594, 1487, 1447, 1209, 1097, 1029, 899, 768, 744, 694; HR-ESIMS ( $m/z$ ): Calcd. for  $\text{C}_{22}\text{H}_{19}\text{NNa}$   $[\text{M}+\text{Na}]^+$  320.1410, found 320.1412; Calcd. for  $\text{C}_{22}\text{H}_{19}\text{NK}$   $[\text{M}+\text{K}]^+$  336.1149, found 336.1153.

***N*-(Prop-2-ynyl)-*N*-trityl-1H-pyrrole-2-carboxamide (S5):** To the mixture of pyrrole

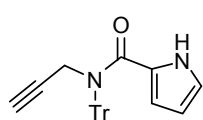

carboxylic acid (10.00 g, 90.09 mmol) in dry  $\text{CH}_2\text{Cl}_2$  (125 mL), oxalyl chloride (19.65 mL, 225.2 mmol) was added followed by two drops of DMF. The solution was stirred for 3-4 h and then concentrated to obtain crude acid chloride derivative. The amine **S4** (10.72 g, 36.04 mmol) and triethylamine (17.54 mL, 126.1 mmol) were dissolved in dry THF (150 mL) and cooled to 0 °C. The solution of crude acid chloride derivative in dry THF (100 mL) was added to above solution over a period of 20-30 min. The solution was warmed to r.t. and stirred overnight. The reaction mixture was worked up by adding  $\text{NH}_4\text{Cl}$  and repeatedly extracting with EtOAc. The combined organic extracts were washed with  $\text{NaHCO}_3$  solution, followed by the brine solution, dried ( $\text{Na}_2\text{SO}_4$ ) and concentrated. The residue was purified by column chromatography (hexane/EtOAc, 80:20) to obtain product **S5** (12.65 g, 90%) with an estimated 85% purity. This product was used in excess for next reaction. For characterization purpose amide **S5** was purified by repeated recrystallization from  $\text{CH}_2\text{Cl}_2$ ; m.p 198-202 °C;  $^1\text{H}$  NMR:  $\delta = 9.48$  (brs, 1H), 7.38-7.37 (m, 6H), 7.28-7.19 (m, 10H), 6.76-6.75 (m, 1H), 6.27-6.25 (m, 1H), 4.62 (d,  $J = 2.3$  Hz, 2H), 2.17 (t,  $J = 2.3$  Hz, 1H);  $^{13}\text{C}$  NMR:  $\delta = 163.5, 143.1, 130.3, 127.5, 126.8, 126.2, 121.8, 112.8, 109.9, 80.9, 78.2, 72.9, 40.1$ ; IR (neat,  $\text{cm}^{-1}$ ): 3288, 3244, 3058, 3032, 2120, 1604, 1490, 1403,

1342, 1131, 917, 840, 724, 698; HR-ESIMS (m/z): Calcd. for  $C_{27}H_{22}N_2ONa$   $[M+Na]^+$  413.1624, found 413.1638; Calcd. for  $C_{27}H_{22}N_2OK$   $[M+K]^+$  429.1364, found 429.1360.

***N*-(3-(1-(*N,N*-Dimethylsulfamoyl)-1*H*-imidazol-4-yl)prop-2-ynyl)-*N*-trityl-1*H*-pyrrole-2-carboxamide (**12**):** 4-Iodoimidazole (1.28 g, 4.25 mmol), alkyne **S5** (2.48 g, 6.37

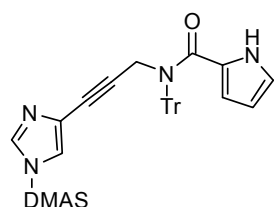

mmol),  $K_2CO_3$  (1.17 g, 8.52 mmol), CuI (40 mg, 0.21 mmol) and  $Pd(PPh_3)_2Cl_2$  (74 mg, 0.11 mmol) were placed in a reaction flask.

To the above reaction mixture dry THF (40 mL) was added and  $N_2$  was bubbled through it for 3-5 min. The heterogeneous mixture was stirred at 55 °C overnight. The reaction mixture was cooled to r.t. and water (15 mL) was added and the layers were separated. The aqueous layer was extracted with EtOAc. The combined organic extracts were dried ( $Na_2SO_4$ ) and concentrated to provide brown solids. The crude product was purified by chromatography ( $CH_2Cl_2 \rightarrow$  hexane/EtOAc, 45:55) to give product **12** (1.46 g, 61%) as a pale yellowish solid; m.p 170-173 °C;  $^1H$  NMR:  $\delta$  = 9.43 (brs, 1H), 7.78 (d,  $J$  = 1.3 Hz, 1H), 7.41-7.39 (m, 6H), 7.29-7.25 (m, 6H), 7.23-7.20 (m, 4H), 7.19-7.18 (m, 1H), 6.80-6.78 (m, 1H), 6.28-6.26 (m, 1H), 4.82 (s, 2H), 2.88 (s, 6H);  $^{13}C$  NMR:  $\delta$  = 163.7, 143.0, 136.4, 130.3, 127.5, 126.8, 126.2, 125.7, 121.8, 121.1, 112.9, 110.2, 88.2, 78.0, 76.4, 40.9, 38.3; IR (neat,  $cm^{-1}$ ): 3248, 3140, 3055, 1595, 1396, 1344, 1259, 1177, 1132, 1083, 958, 836, 745, 721; HR-ESIMS (m/z): Calcd. for  $C_{32}H_{29}N_5O_3SNa$   $[M+Na]^+$  586.1883, found 586.1899; Calcd. for  $C_{32}H_{29}N_5O_3SK$   $[M+K]^+$  602.1623, found 602.1610.

**(Z)-N,N-Dimethyl-4-((1-oxo-2-trityl-2,3-dihydropyrrolo[1,2-a]pyrazin-4(1H)-**

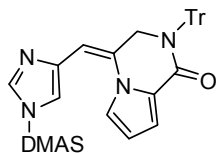

**ylidene)methyl)-1H-imidazole-1-sulfonamide (15):** The alkyne **12**

(2.68 g, 4.75 mmol) and  $\text{Cs}_2\text{CO}_3$  (2.32 g, 7.12 mmol) were dissolved in dry DMF (30 mL) and stirred at r.t. for 30 min. The reaction mixture was quenched with  $\text{NH}_4\text{Cl}$  solution and extracted with EtOAc. The combined organic extracts were washed with brine solution, dried ( $\text{Na}_2\text{SO}_4$ ), concentrated, and purified by column chromatography (hexane/EtOAc, 45:55) to give pyrazine **15** (2.17 g, 81%) as a pale yellow solid; m.p 181-184 °C;  $^1\text{H}$  NMR:  $\delta$  = 7.93 (s, 1H), 7.63-7.62 (m, 1H), 7.55-7.54 (m, 6H), 7.34 (s, 1H), 7.29-7.25 (m, 6H), 7.18-7.15 (m, 3H), 6.90-6.89 (m, 1H), 6.22-6.21 (m, 1H), 5.94 (s, 1H), 4.06 (s, 2H), 2.91 (s, 6H);  $^{13}\text{C}$  NMR:  $\delta$  = 161.1, 142.9, 137.4, 136.6, 130.3, 128.9, 127.9, 126.7, 126.5, 123.2, 116.9, 115.8, 111.0, 104.8, 76.0, 52.7, 38.4; IR (neat,  $\text{cm}^{-1}$ ): 3148, 3116, 1698, 1663, 1640, 1463, 1382, 1169, 1078, 963, 777, 748, 706; HR-ESIMS ( $m/z$ ): Calcd. for  $\text{C}_{32}\text{H}_{29}\text{N}_5\text{O}_3\text{SNa}$   $[\text{M}+\text{Na}]^+$  586.1883, found 586.1899; Calcd. for  $\text{C}_{32}\text{H}_{29}\text{N}_5\text{O}_3\text{SK}$   $[\text{M}+\text{K}]^+$  602.1623, found 602.1611.

**3-(1-(N,N-Dimethylsulfamoyl)-1H-imidazol-4-yl)prop-2-ynyl-1H-pyrrole-2-**

**carboxylate (13):** To a mixture of imidazole propargyl alcohol derivative **S1** (1.20 g,

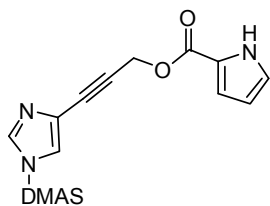

5.24 mmol), pyrrole carboxylic acid (640 mg, 5.76 mmol), DMAP (64 mg, 0.52 mmol) and CSA (73 mg, 0.31 mmol) in dry  $\text{CH}_2\text{Cl}_2$  (120 mL), a solution of DCC (1.62 g, 7.86 mmol) in dry  $\text{CH}_2\text{Cl}_2$  (10 mL) was added dropwise at -78 °C. The solution was then stirred

at r.t. for 24 h. The mixture was filtered, the filtrate was concentrated and purified by column chromatography (hexane/EtOAc, 40:60) to obtain ester **13** (1.23 g, 73%) as a



white solid; m.p 156-158 °C;  $^1\text{H}$  NMR (300 MHz):  $\delta$  = 9.32 (brs, 1H), 7.83 (d,  $J$  = 1.4 Hz, 1H), 7.40 (d,  $J$  = 1.4 Hz, 1H), 7.00-6.98 (m, 2H), 6.28-6.26 (m, 1H), 5.07 (s, 2H), 2.86 (s, 6H);  $^{13}\text{C}$  NMR (75 MHz):  $\delta$  = 160.2, 136.6, 125.3, 123.6, 121.9, 121.5, 116.3, 110.8, 85.4, 78.6, 52.4, 38.3; IR (neat,  $\text{cm}^{-1}$ ): 3321, 3132, 3070, 2969, 2244, 1713, 1392, 1317, 1266, 1163, 1080, 960, 857, 748, 724; HR-ESIMS ( $m/z$ ): Calcd. for  $\text{C}_{13}\text{H}_{15}\text{N}_4\text{O}_4\text{S}$   $[\text{M}+\text{H}]^+$  323.0809, found 323.0805; Calcd. for  $\text{C}_{13}\text{H}_{14}\text{N}_4\text{O}_4\text{SNa}$   $[\text{M}+\text{Na}]^+$  345.0628, found 345.0646.

**(Z)-N,N-Dimethyl-4-((1-oxo-1H-pyrrolo[2,1-c][1,4]oxazin-4(3H)-ylidene)methyl)-1H-imidazole-1-sulfonamide (16):** The mixture of ester **13** (100 mg, 0.31 mmol) and

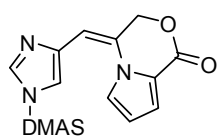

$\text{Cs}_2\text{CO}_3$  (131 mg, 0.40 mmol) in dry DMF (2.5 mL) was heated at 80 °C for 1.5 h. Then the reaction mixture was neutralized with 1N HCl at 0 °C and the resulting aqueous layer was repeatedly extracted with EtOAc. The organic layers were combined, washed with the brine solution, dried with  $\text{Na}_2\text{SO}_4$  and purified on column (hexane/EtOAc, 30:70) to give morpholine **16** (65 mg, 65%) as a pale yellowish powder; m.p 156-157 °C;  $^1\text{H}$  NMR:  $\delta$  = 8.04-8.03 (m, 1H), 7.90 (s, 1H), 7.30 (s, 1H), 7.18-7.17 (m, 1H), 6.38 (t,  $J$  = 3.4 Hz, 1H), 6.13 (s, 1H), 4.92 (s, 2H), 2.88 (s, 6H);  $^{13}\text{C}$  NMR (75 MHz):  $\delta$  = 158.7, 136.7, 136.6, 126.7, 126.6, 119.7, 118.9, 118.1, 111.6, 107.5, 71.7, 38.3; IR (neat,  $\text{cm}^{-1}$ ): 3142, 3127, 2927, 1700, 1519, 1462, 1391, 1291, 1241, 1173, 1078, 1016, 884, 755, 718; HR-ESIMS ( $m/z$ ): Calcd. for  $\text{C}_{13}\text{H}_{15}\text{N}_4\text{O}_4\text{S}$   $[\text{M}+\text{H}]^+$  323.0809, found 323.0801; Calcd. for  $\text{C}_{13}\text{H}_{14}\text{N}_4\text{O}_4\text{SNa}$   $[\text{M}+\text{Na}]^+$  345.0628, found 345.0634.

**1-Methyl-*N*-(prop-2-ynyl)-*N*-trityl-1H-pyrrole-2-carboxamide (**S6**):** To an ice-cold

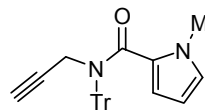

solution of a pyrrole derivative **S5** ( $\approx 85\%$ , 1.10 g, 2.81 mmol) in dry THF (25 mL), NaH (60%, 146 mg, 3.65 mmol) was added and the solution was allowed to warm to 20 °C over a period of 10-15 min. The solution was cooled back to 0 °C and MeI (0.88 mL, 14.1 mmol) was added dropwise and stirring was continued for 1 h at r.t. The resulting mixture was quenched with  $\text{NH}_4\text{Cl}$  solution and extracted repeatedly with EtOAc. The organic extracts were combined, washed with brine solution, dried ( $\text{Na}_2\text{SO}_4$ ) and concentrated to give a brown solid. The crude material was purified on silica gel (hexane/EtOAc, 70:30) to obtain methyl protected derivative **S6** (795 mg, 70%) as a white solid; m.p 200-202 °C;  $^1\text{H}$  NMR:  $\delta$  = 7.51-7.49 (m, 6H), 7.29-7.25 (m, 6H), 7.22-7.19 (m, 3H), 6.98 (dd,  $J$  = 4.0, 2.2 Hz, 1H), 6.68 (t,  $J$  = 2.1 Hz, 1H), 6.14 (dd,  $J$  = 4.0, 2.5 Hz, 1H), 4.47 (d,  $J$  = 2.3 Hz, 2H), 3.58 (s, 3H), 1.76 (t,  $J$  = 2.3 Hz, 1H);  $^{13}\text{C}$  NMR:  $\delta$  = 166.5, 143.3, 129.7, 127.9, 127.7, 127.0, 126.6, 112.7, 107.1, 80.7, 76.8, 70.6, 41.5, 35.8; IR (neat,  $\text{cm}^{-1}$ ): 3311, 3128, 3056, 1620, 1414, 1337, 1249, 1116, 967, 904, 742, 697; HR-ESIMS ( $m/z$ ): Calcd. for  $\text{C}_{28}\text{H}_{24}\text{N}_2\text{ONa}$   $[\text{M}+\text{Na}]^+$  427.1718, found 427.1798; Calcd. for  $\text{C}_{28}\text{H}_{24}\text{N}_2\text{OK}$   $[\text{M}+\text{K}]^+$  443.1520, found 443.1520.

***N*-(3-(1-(*N,N*-Dimethylsulfamoyl)-1H-imidazol-4-yl)prop-2-ynyl)-1-methyl-*N*-trityl-**

**1H-pyrrole-2-carboxamide (**17**):** 4-Iodoimidazole (462 mg, 1.53 mmol), alkyne **S6** (926

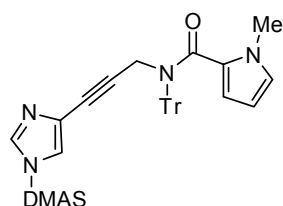

mg, 2.29 mmol),  $\text{K}_2\text{CO}_3$  (422 mg, 3.06 mmol), CuI (15 mg, 0.08 mmol) and  $\text{Pd}(\text{PPh}_3)_2\text{Cl}_2$  (27 mg, 0.04 mmol) were placed in a reaction flask. To the above reaction mixture dry THF (25 mL) was added and  $\text{N}_2$  was bubbled through it for 3-5 min. The heterogeneous mixture was

stirred at 55 °C overnight. The reaction mixture was cooled to r.t. and water (15 mL) was added and the layers separated. The aqueous layer was extracted with EtOAc. The combined organic extracts were dried (Na<sub>2</sub>SO<sub>4</sub>) and concentrated to brown solids. The crude product was purified by flash chromatography (CH<sub>2</sub>Cl<sub>2</sub>→hexane/EtOAc, 50:50) to give product **17** (566 mg, 64%) as a yellowish solid; m.p 189-191 °C; <sup>1</sup>H NMR: δ = 7.70 (d, *J* = 1.1 Hz, 1H), 7.54-7.52 (m, 6H), 7.29-7.26 (m, 6H), 7.20-7.18 (m, 3H), 6.99-6.98 (m, 2H), 6.67 (t, *J* = 2.1 Hz, 1H), 6.14 (dd, *J* = 4.0, 2.5 Hz, 1H), 4.67 (s, 2H), 3.58 (s, 3H), 2.85 (s, 6H); <sup>13</sup>C NMR: δ = 166.8, 143.3, 136.2, 129.7, 127.9, 127.7, 127.3, 126.6, 125.6, 121.1, 113.0, 107.3, 88.2, 76.6, 74.6, 42.3, 38.3, 35.7; IR (neat, cm<sup>-1</sup>): 3148, 3085, 2980, 2239, 1736, 1659, 1437, 1392, 1175, 1087, 960, 828, 777, 704; HR-ESIMS (m/z): Calcd. for C<sub>33</sub>H<sub>31</sub>N<sub>5</sub>O<sub>3</sub>SNa [M+Na]<sup>+</sup> 600.2040, found 600.2057; Calcd. for C<sub>33</sub>H<sub>31</sub>N<sub>5</sub>O<sub>3</sub>SK [M+K]<sup>+</sup> 616.1779, found 616.1775.

**(Z)-N,N-Dimethyl-4-((1-methyl-4-oxo-5-trityl-5,6-dihydro-1H-pyrrolo[3,2-c]pyridin-7(4H)-ylidene)methyl)-1H-imidazole-1-sulfonamide (18):** The alkyne **17** (150 mg,

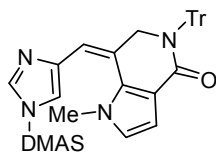

0.26 mmol) and Pd(OAc)<sub>2</sub> (9.0 mg, 0.013 mmol) were dissolved in dry DMF (3 mL) and stirred at 80 °C for 24 h. The reaction mixture was partitioned between H<sub>2</sub>O and EtOAc. The organic extract was washed

with brine solution, dried (Na<sub>2</sub>SO<sub>4</sub>), concentrated, and purified by column chromatography (hexane/EtOAc, 40:60) to give pyridine derivative **18** (79 mg, 52%) as a pale yellow solid; m.p 172-176 °C; <sup>1</sup>H NMR: δ = 7.92 (d, *J* = 1.1 Hz, 1H), 7.55 (d, *J* = 7.5 Hz, 6H), 7.23 (t, *J* = 7.6 Hz, 6H), 7.18 (s, 1H), 7.14-7.12 (m, 3H), 6.56 (d, *J* = 2.9 Hz, 6H), 6.52 (d, *J* = 2.9 Hz, 1H), 6.40 (s, 1H), 4.05 (s, 2H), 3.15 (s, 3H), 2.93 (s, 6H); <sup>13</sup>C

NMR:  $\delta$  = 165.9, 143.8, 140.2, 136.9, 134.2, 129.0, 127.6, 126.6, 126.1, 126.0, 120.0, 116.4, 116.3, 109.0, 76.0, 57.1, 38.4, 36.4; IR (neat,  $\text{cm}^{-1}$ ): 3111, 3022, 2921, 1650, 1595, 1448, 1389, 1262, 1170, 1074, 961, 800, 721; HR-ESIMS ( $m/z$ ): Calcd. for  $\text{C}_{33}\text{H}_{32}\text{N}_5\text{O}_3\text{S}$   $[\text{M}+\text{H}]^+$  578.2220, found 578.2199; Calcd. for  $\text{C}_{33}\text{H}_{31}\text{N}_5\text{O}_3\text{SNa}$   $[\text{M}+\text{Na}]^+$  600.2040, found 600.2051.

***N,N*-Dimethyl-4-(5-(methylamino)-3-oxo-2-tritylisoindolin-4-yl)-1H-imidazole-1-**

**sulfonamide (S7):**  $\text{N}_2$  was bubbled through solution of the alkyne **17** (150 mg, 0.259

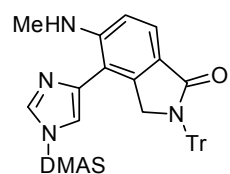

mmol),  $\text{AuCl}(\text{PPh}_3)$  (13 mg, 0.025 mmol) in dry dioxane (15 mL) for 2-3 min and then the solution was heated to 115 °C in sealed tube for 24 h. The reaction mixture was concentrated and purified by column

chromatography (hexane/EtOAc, 30:70) providing pale yellowish solid of aniline derivative **S7** (60 mg, 40%);  $^1\text{H}$  NMR:  $\delta$  = 7.94-7.92 (m, 2H), 7.66 (d,  $J$  = 8.6 Hz, 1H), 7.30-7.25 (m, 15H), 6.84 (s, 1H), 6.76 (d,  $J$  = 8.6 Hz, 1H), 4.27 (s, 2H), 2.96 (d,  $J$  = 4.6 Hz, 3H), 2.72 (s, 6H);  $^{13}\text{C}$  NMR:  $\delta$  = 169.7, 151.2, 143.4, 140.4, 140.2, 134.9, 130.1, 127.7, 127.1, 125.5, 121.2, 114.1, 110.8, 108.4, 73.8, 54.9, 38.4, 30.4; IR (neat,  $\text{cm}^{-1}$ ): 3307, 3254, 3126, 2923, 2234, 1673, 1601, 1444, 1372, 1278, 1170, 1084, 961, 907, 751, 723; HR-ESIMS ( $m/z$ ): Calcd. for  $\text{C}_{33}\text{H}_{32}\text{N}_5\text{O}_3\text{S}$   $[\text{M}+\text{H}]^+$  578.2220, found 578.2215; Calcd. for  $\text{C}_{33}\text{H}_{31}\text{N}_5\text{O}_3\text{SNa}$   $[\text{M}+\text{Na}]^+$  600.2040, found 600.2055.

***N,N*-Dimethyl-4-(5-(methylamino)-3-oxoisoindolin-4-yl)-1H-imidazole-1-**

**sulfonamide (24):** A solution of aniline derivative **S7** (55.0 mg, 0.095 mmol) in

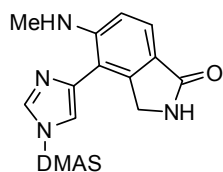

TFA/CH<sub>2</sub>Cl<sub>2</sub> (1 mL/2 mL) was stirred at r.t. for 3 h. Then the reaction mixture was concentrated, dissolved in EtOAc and partitioned with half saturated solution of NaHCO<sub>3</sub>. The organic layer was dried (Na<sub>2</sub>SO<sub>4</sub>), concentrated and purified on silica gel (EtOAc/MeOH, 98:2) obtaining amide **24** (30 mg, 94%) as a white solid; m.p 226-227 °C; <sup>1</sup>H NMR: δ = 7.96 (s, 1H), 7.64 (d, *J* = 8.6 Hz, 1H), 7.27 (s, 1H), 6.73 (d, *J* = 8.6 Hz, 1H), 4.35 (s, 2H), 2.90 (s, 3H), 2.87 (s, 6H); <sup>13</sup>C NMR: δ = 151.3, 143.1, 139.7, 135.4, 125.1, 119.4, 114.7, 110.8, 109.6, 46.6, 38.3, 30.3, 29.7; IR (neat, cm<sup>-1</sup>): 3305, 3175, 3066, 2920, 2439, 2320, 1668, 1597, 1487, 1383, 1279, 1164, 966, 822, 730; HR-ESIMS (*m/z*): Calcd. for C<sub>14</sub>H<sub>18</sub>N<sub>5</sub>O<sub>3</sub>S [M+H]<sup>+</sup> 336.1125, found 336.1118; Calcd. for C<sub>14</sub>H<sub>17</sub>N<sub>5</sub>O<sub>3</sub>SNa [M+Na]<sup>+</sup> 358.0944, found 358.0948.

***N,N*-Dimethyl-4-(1-methyl-4-oxo-5-trityl-1,4,5,6-tetrahydropyrrolo[3,2-*c*]azepin-8-yl)-1H-imidazole-1-sulfonamide (25):** A solution of alkyne **17** (100 mg, 0.173 mmol)

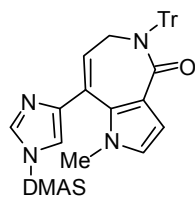

and AuCl<sub>3</sub> (5.24 mg, 0.017mmol) in dry dioxane (10 mL) was heated to 60 °C in sealed tube for overnight. The reaction mixture was concentrated purified by flash chromatography (hexane/EtOAc, 25:75) providing azepin **25** in 43% yield; m.p 225-228 °C; <sup>1</sup>H NMR: δ = 7.97 (s, 1H), 7.39-7.38 (m, 6H), 7.25-7.21 (m, 6H), 7.17-7.13 (m, 4H), 6.61 (s, 2H), 6.52 (t, *J* = 7.5 Hz, 1H), 4.07-4.04 (m, 1H), 3.71-3.66 (m, 1H), 3.32 (s, 3H), 2.97 (s, 6H); <sup>13</sup>C NMR: δ = 166.4, 144.2, 141.7, 136.9, 130.2, 129.5, 128.5, 127.6, 127.5, 126.3, 125.1, 124.8, 115.2, 111.4, 77.6, 45.6, 38.4, 36.9; IR (neat, cm<sup>-1</sup>): 3133, 3122, 2915, 1637, 1593, 1492, 1454, 1393, 1260, 1171, 1081, 955, 914, 837, 729; HR-ESIMS (*m/z*): Calcd. for

$C_{33}H_{32}N_5O_3S$   $[M+H]^+$  578.2220, found 578.2207; Calcd. for  $C_{33}H_{31}N_5O_3SNa$   $[M+Na]^+$  600.2040, found 600.2058.

***N*-(3-(1-(*N,N*-Dimethylsulfamoyl)-1*H*-imidazol-4-yl)prop-2-ynyl)-*N*-1-dimethyl-1*H*-**

**pyrrole-2-carboxamide (23):** 4-Iodoimidazole (343 mg, 1.14 mmol), alkyne (260 mg,

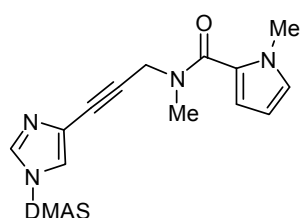

1.48 mmol), CuI (10.7 mg, 0.057 mmol) and Pd(PPh<sub>3</sub>)<sub>2</sub>Cl<sub>2</sub> (20.0 mg, 0.028 mmol) were placed in a reaction flask. To the above reaction mixture 1:1 mixture of dry THF (5 mL) and triethyl amine (5 mL) was added and N<sub>2</sub> was bubbled through it for 3-5 min.

The solution was stirred at 60 °C for 15 h. The reaction mixture was concentrated and purified by flash chromatography (hexane/EtOAc, 30:70→EtOAc) to give product **23** (338 mg, 85%) as a pale yellowish solid; m.p 135-137 °C; <sup>1</sup>H NMR: δ = 7.83 (s, 1H), 7.34 (s, 1H), 6.70 (s, 1H), 6.57(s, 1H), 6.08 (t, *J* = 3.1 Hz, 1H), 4.54 (s, 2H), 3.79 (s, 3H), 3.23 (s, 3H), 2.87 (s, 6H); <sup>13</sup>C NMR (75 MHz): δ = 163.8, 136.6, 126.9, 125.7, 124.5, 121.0, 113.8, 107.1, 86.5, 38.3, 36.0; IR (neat, cm<sup>-1</sup>): 3132, 3117, 2961, 1618, 1532, 1456, 1380, 1324, 1243, 1171, 1085, 958, 841, 722; HR-ESIMS (*m/z*): Calcd. for  $C_{15}H_{20}N_5O_3S$   $[M+H]^+$  350.1281, found 350.1283; Calcd. for  $C_{15}H_{19}N_5O_3SNa$   $[M+Na]^+$  372.1101, found 372.1119.

**4-(1,5-Dimethyl-4-oxo-1,4,5,6-tetrahydropyrrolo[3,2-*c*]azepin-8-yl)-*N,N*-dimethyl-1*H*-imidazole-1-sulfonamide (26) and 4-(1,7-Dimethyl-8-oxo-1,6,7,8-**

**tetrahydropyrrolo[2,3-*c*]azepin-4-yl)-*N,N*-dimethyl-1*H*-imidazole-1-sulfonamide**

**(27):** A solution of alkyne **23** (200 mg, 0.57 mmol) and AuCl<sub>3</sub> (17.3 mg, 0.057mmol) in

dry dioxane (15 mL) was heated to 65 °C in sealed tube for overnight. The reaction mixture was concentrated purified by flash chromatography (hexane/EtOAc, 30:70→EtOAc) providing two azepins **26** and **27**.

**Azepine 26** (70 mg, 35%, pale yellowish solid): m.p 229-232 °C;  $^1\text{H}$  NMR:  $\delta$  = 7.89 (s,

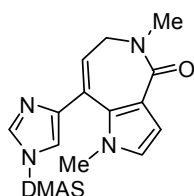

1H), 7.00 (s, 1H), 6.74 (d,  $J$  = 2.9 Hz, 1H), 6.69 (d,  $J$  = 2.9 Hz, 1H), 6.58 (t,  $J$  = 7.6 Hz, 1H), 3.74 (d,  $J$  = 7.6 Hz, 1H), 3.35 (s, 3H), 3.16 (s, 3H), 2.85 (s, 6H);  $^{13}\text{C}$  NMR:  $\delta$  = 166.0, 141.3, 136.8, 130.6, 128.6, 125.3,

125.2, 123.8, 115.1, 109.9, 47.3, 38.3, 36.7, 35.4; IR (neat,  $\text{cm}^{-1}$ ): 3131, 3088, 2955, 1603, 1556, 1496, 1379, 1262, 1169, 1087, 959, 861, 727; HR-ESIMS ( $m/z$ ): Calcd. for  $\text{C}_{15}\text{H}_{20}\text{N}_5\text{O}_3\text{S}$   $[\text{M}+\text{H}]^+$  350.1281, found 350.1283; Calcd. for  $\text{C}_{15}\text{H}_{19}\text{N}_5\text{O}_3\text{SNa}$   $[\text{M}+\text{Na}]^+$  372.1101, found 372.1115.

**Azepine 27** (82 mg, 41%, pale yellowish solid): m.p 212-215 °C;  $^1\text{H}$  NMR:  $\delta$  = 7.89 (d,  $J$

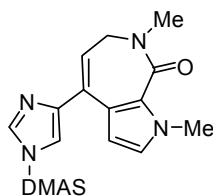

= 1.3 Hz, 1H), 7.25 (s, 1H), 6.77 (d,  $J$  = 2.9 Hz, 1H), 6.70 (t,  $J$  = 7.0 Hz, 1H), 6.31(d,  $J$  = 2.9 Hz, 1H), 3.97 (s, 3H), 3.78 (d,  $J$  = 7.0 Hz, 1H), 3.15 (s, 3H), 2.84 (s, 6H);  $^{13}\text{C}$  NMR:  $\delta$  = 162.2, 142.1, 136.7, 132.7,

127.3, 127.1, 124.5, 120.1, 115.3, 106.7, 47.3, 38.3, 36.7, 34.7; IR (neat,  $\text{cm}^{-1}$ ): 3137, 3041, 2924, 1727, 1619, 1481, 1386, 1262, 1174, 1099, 959, 821, 721; HR-ESIMS ( $m/z$ ): Calcd. for  $\text{C}_{15}\text{H}_{20}\text{N}_5\text{O}_3\text{S}$   $[\text{M}+\text{H}]^+$  350.1281, found 350.1286; Calcd. for  $\text{C}_{15}\text{H}_{19}\text{N}_5\text{O}_3\text{SNa}$   $[\text{M}+\text{Na}]^+$  372.1101, found 372.1118.

**(Z)-N,N-Dimethyl-4-((1-oxo-2,3-dihydropyrrolo[1,2-a]pyrazin-4(1H)-ylidene)methyl)-1H-imidazole-1-sulfonamide (28):** The pyrazine derivative **15** (800 mg, 1.42 mmol)

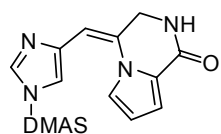

was dissolved in mixture of  $\text{CH}_2\text{Cl}_2$  (5 mL), TFA (7 mL) and  $\text{H}_2\text{O}$  (2.5 mL) and stirred for 1.5 h and then it was concentrated. The residue was dissolved in  $\text{CH}_2\text{Cl}_2$  and neutralized with  $\text{NaHCO}_3$  solution. The organic layer was washed with brine solution, dried ( $\text{Na}_2\text{SO}_4$ ) and purified on column ( $\text{EtOAc} \rightarrow \text{EtOAc/MeOH}$ , 90:10) to give amide **28** (355 mg, 78%) as a white solid; m.p 172-175 °C;  $^1\text{H}$  NMR:  $\delta$  = 7.87 (s, 1H), 7.59 (s, 1H), 7.47-7.46 (m, 1H), 7.18 (s, 1H), 6.97-6.96 (m, 1H), 6.26 (t,  $J$  = 3.2 Hz, 1H), 5.99 (s, 1H), 4.19 (s, 2H), 2.84 (s, 6H);  $^{13}\text{C}$  NMR:  $\delta$  = 161.3, 137.2, 136.5, 129.4, 124.6, 124.1, 116.6, 114.6, 110.8, 106.3, 47.6, 38.3; IR (neat,  $\text{cm}^{-1}$ ): 3294, 3191, 3127, 3059, 2928, 1659, 1556, 1431, 1387, 1230, 1173, 1081, 999, 843, 725, 668; HR-ESIMS ( $m/z$ ): Calcd. for  $\text{C}_{13}\text{H}_{16}\text{N}_5\text{O}_3\text{S}$   $[\text{M}+\text{H}]^+$  322.0968, found 322.0963; Calcd. for  $\text{C}_{13}\text{H}_{15}\text{N}_5\text{O}_3\text{SNa}$   $[\text{M}+\text{Na}]^+$  344.0788, found 344.0794.

**N,N-Dimethyl-4-((1-oxo-1,2,3,4-tetrahydropyrrolo[1,2-a]pyrazin-4-yl)methyl)-1H-imidazole-1-sulfonamide (29):** The olefin **28** (100 mg, 0.31 mmol) was subjected to

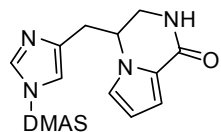

reduction by dissolving it in ethanol (4 mL) in presence of 10% Pd/C (30 mg, 0.03 mmol) with stirring at r.t. under 1 atm  $\text{H}_2$  (balloon) for 5 h. The reaction mixture was filtered through a pad of Celite and the filtrate was concentrated. The residue was purified on silica gel ( $\text{EtOAc/MeOH}$ , 90:10) to provide pyrazine derivative **29** (75 mg, 75%) as a white powder;  $^1\text{H}$  NMR:  $\delta$  = 7.86 (s, 1H), 6.91 (dd,  $J$  = 4.0, 1.4 Hz, 1H), 6.76 (s 1H), 6.55-6.54 (m, 1H), 6.11-6.10 (s, 1H),



5.84 (brs, 1H), 4.64-4.62 (m, 1H), 3.92 (dd,  $J = 12.6, 4.6$  Hz, 1H), 3.53-3.50 (m, 1H), 3.11-3.07 (m, 1H), 3.04-3.00 (m, 1H), 2.81 (s, 6H);  $^{13}\text{C}$  NMR:  $\delta = 161.2, 139.1, 136.9, 123.3, 123.2, 115.6, 113.9, 109.4, 53.6, 44.2, 38.2, 32.3$ .

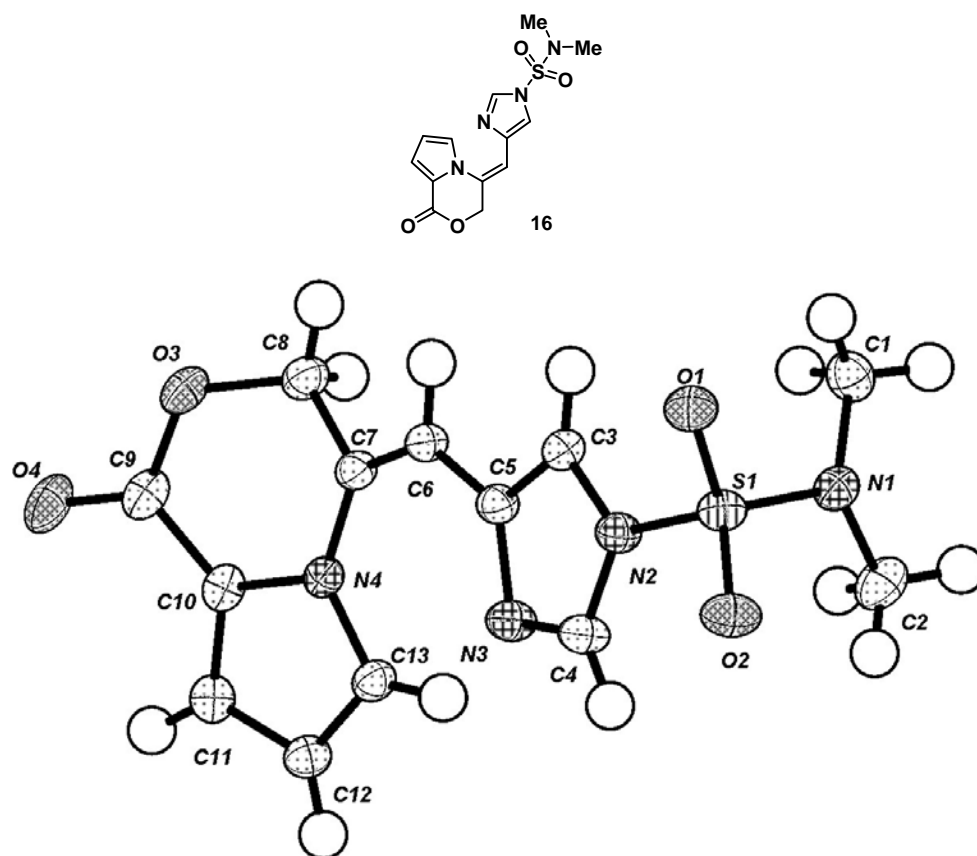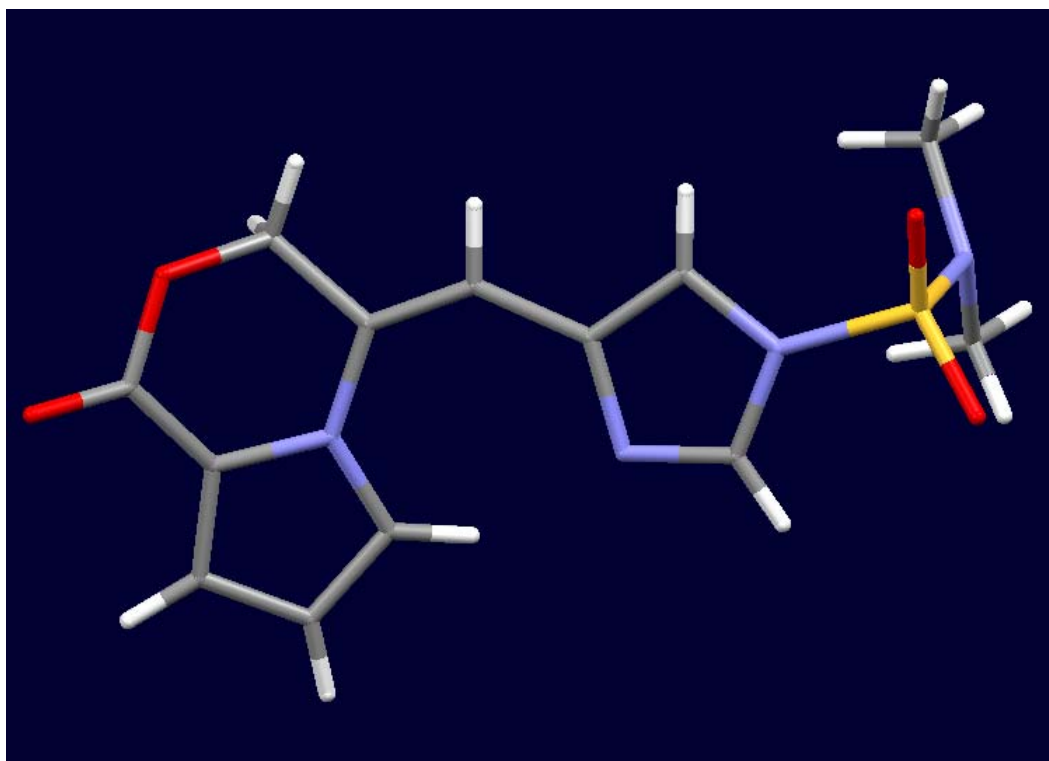

**Figure S1:** X-ray crystal structure of compound **16** (CIF = compound 16)

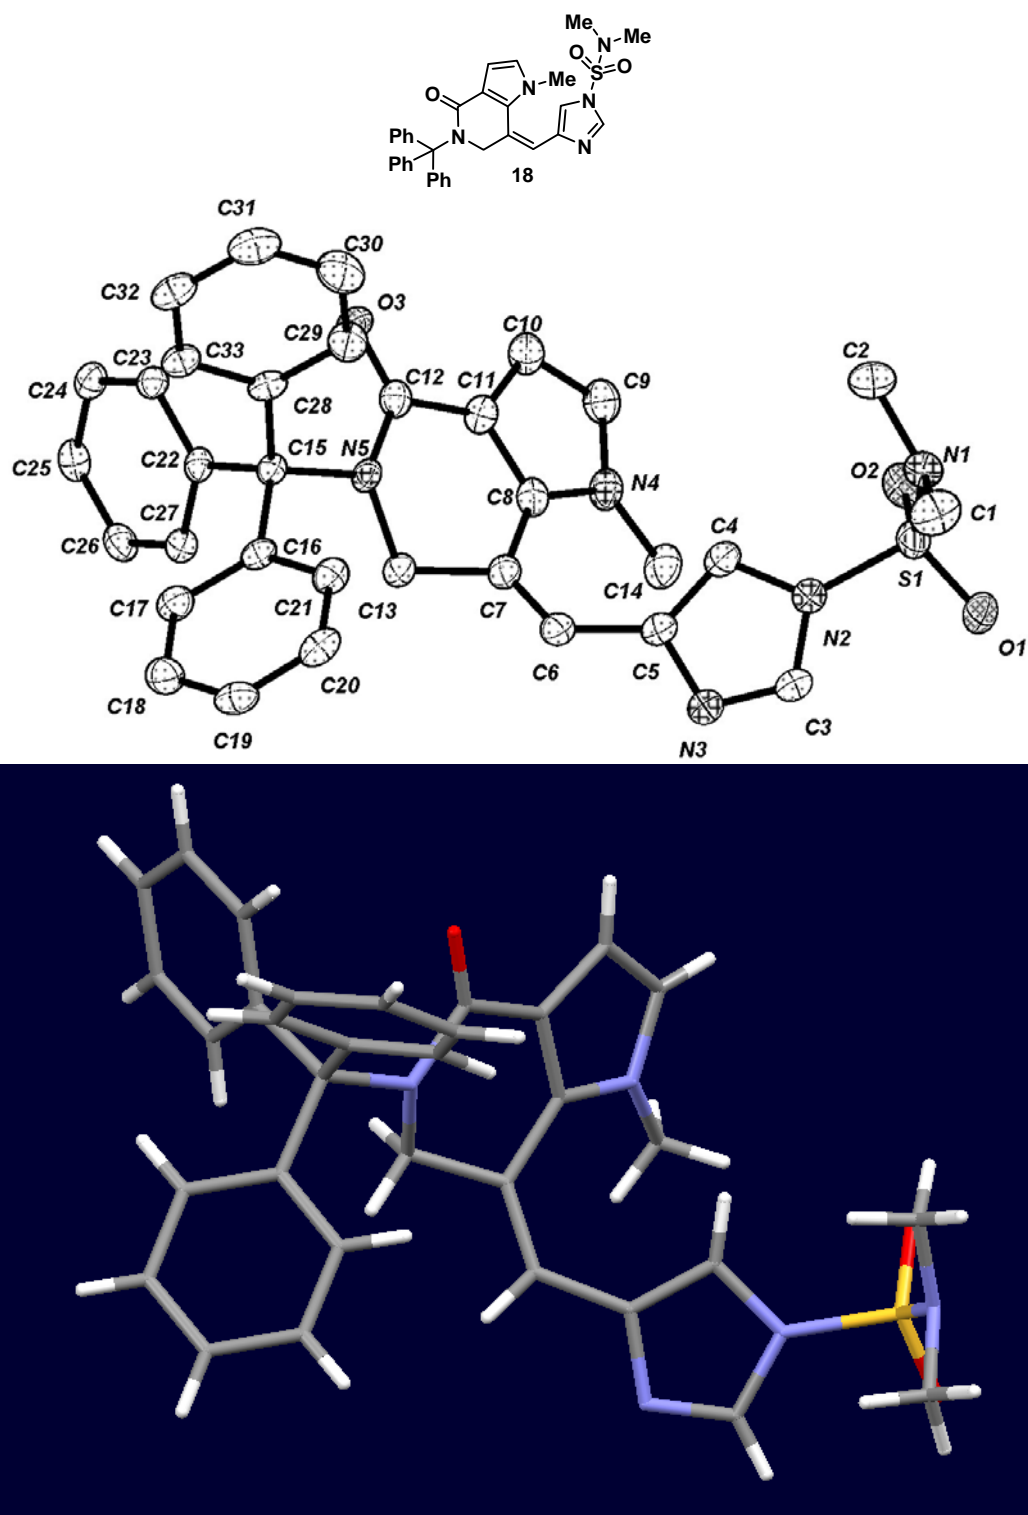

Figure S2: X-ray crystal structure of compound **18** (Cif = compound 18)

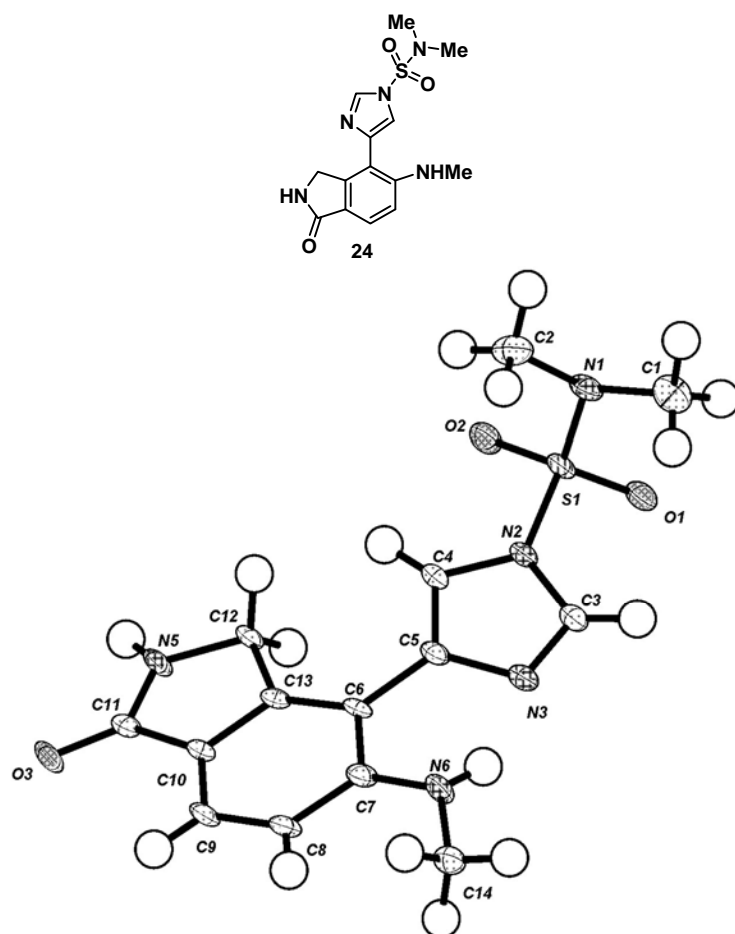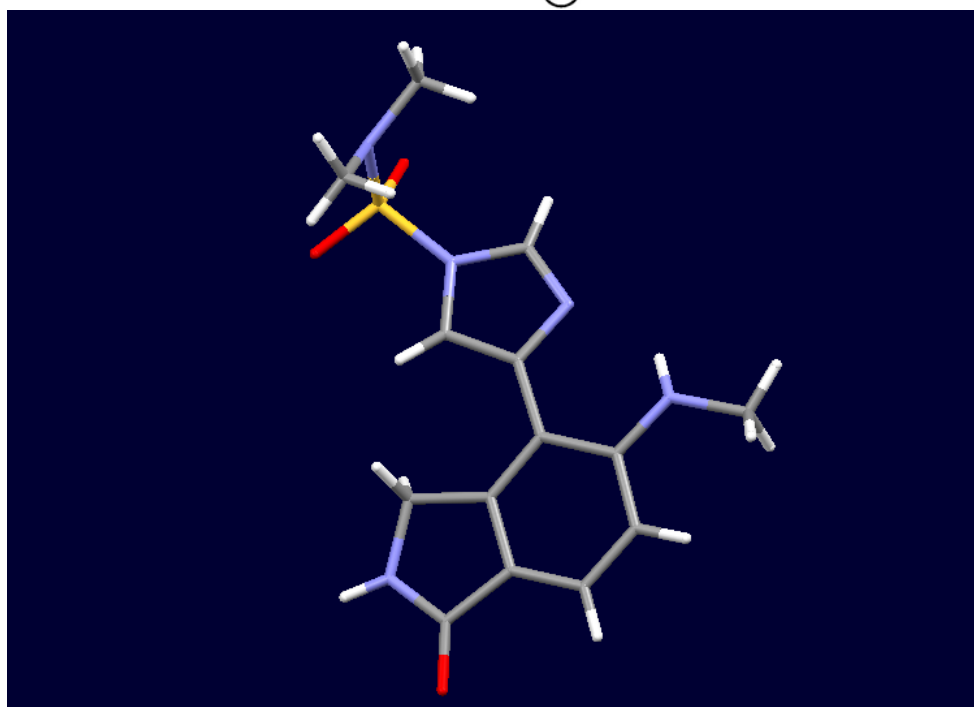

**Figure S3:** X-ray crystal structure compound **24** (Cif = compound 24)

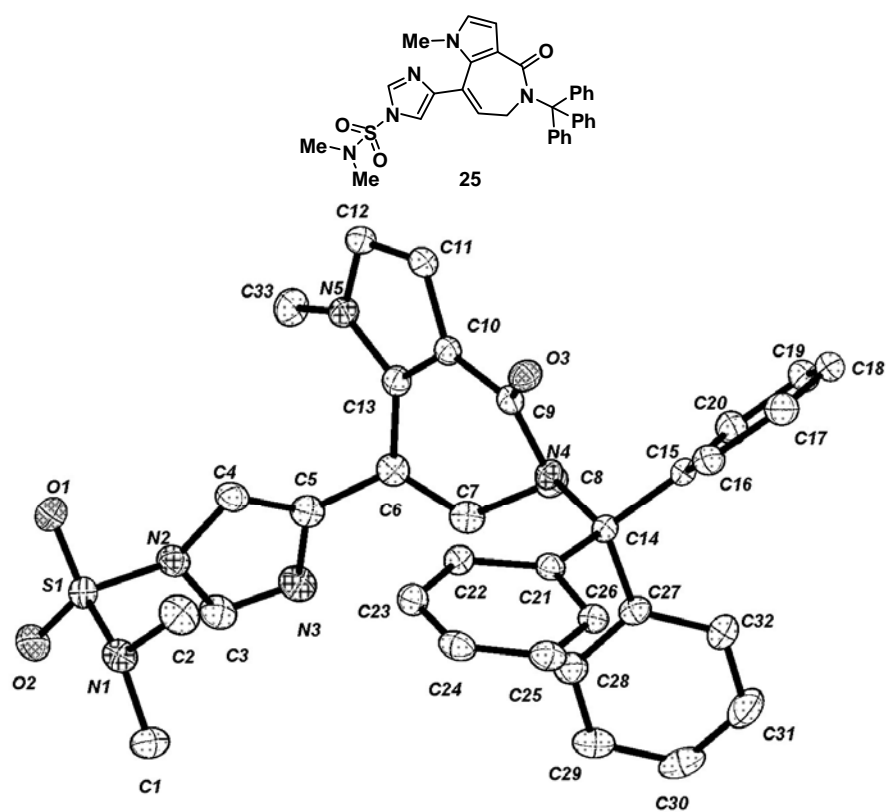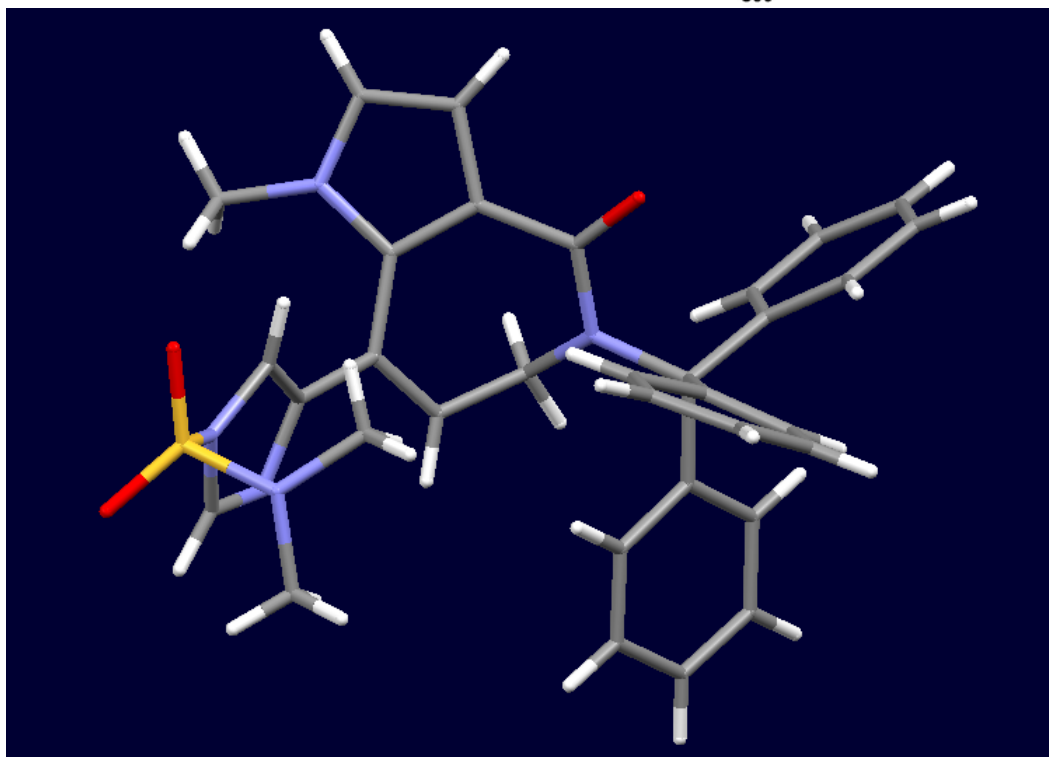

**Figure S4:** X-ray structure of compound 25 (Cif = compound 25)

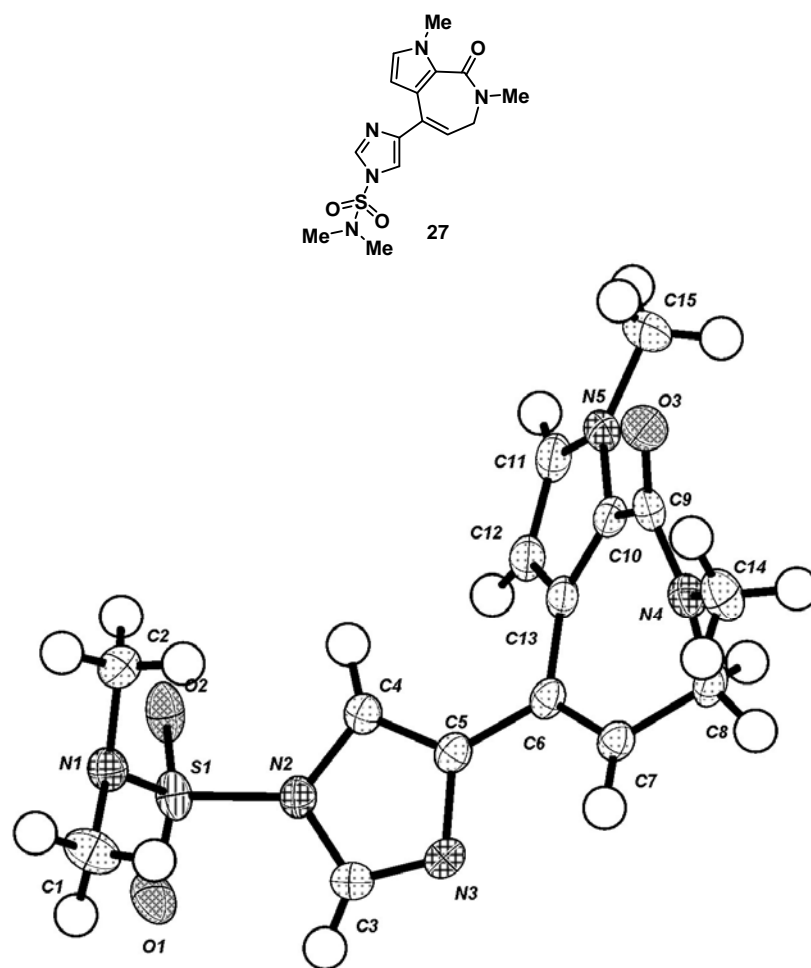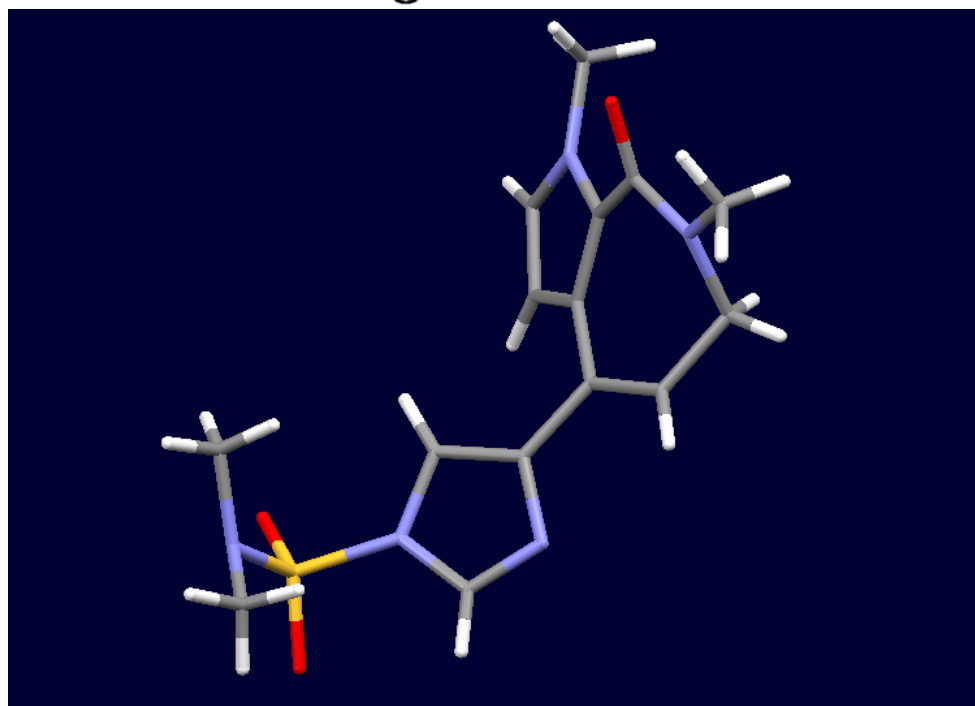

**Figure S5:** X-ray crystal structure of compound **27** (Cif = compound 27)

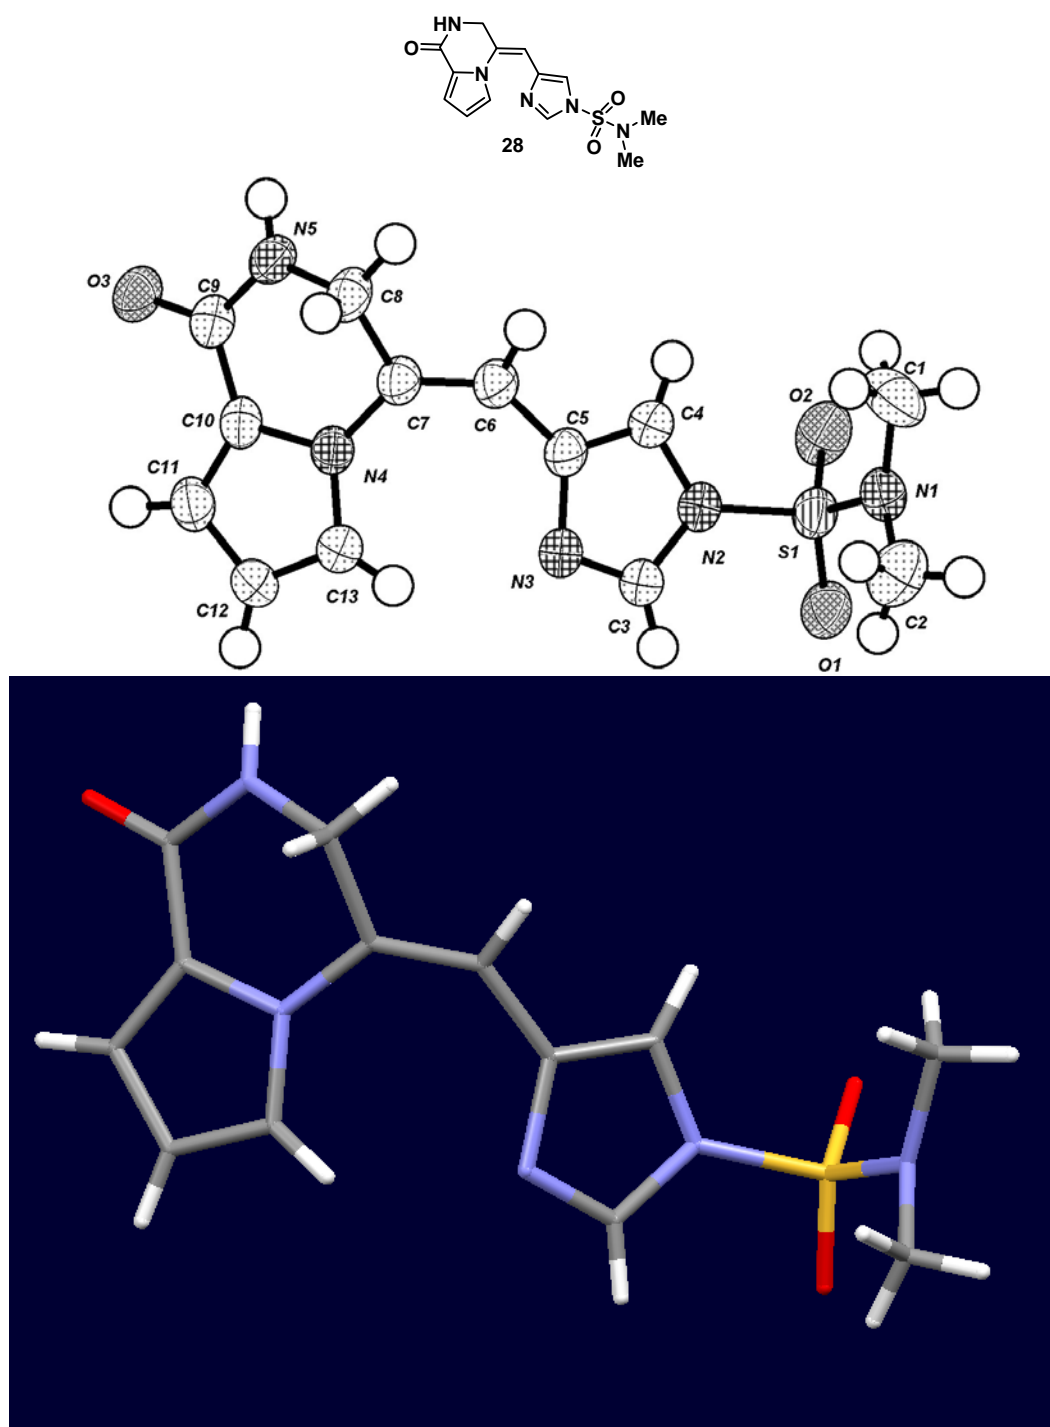

**Figure S6:** X-ray crystal structure of compound **28** (Cif = compound 28)

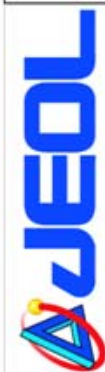

Filename = MSB\_I\_264\_dmas\_prepar  
Author = delta  
Experiment = single\_pulse.ex2  
Sample\_id = S8747160  
Solvent = CHLOROFORM-D  
Creation\_time = 15-FEB-2007 21:21:19  
Revision\_time = 17-OCT-2010 01:43:07  
Current\_time = 6-NOV-2010 22:29:44  
Comment = single\_pulse  
Data\_format = 1D REAL  
Dim\_size = 13107  
Dim\_title = 1H  
Dim\_units = [ppm]  
Dimensions = X  
Site = EXY 300  
Spectrometer = DELTA2\_NMR  
Field\_strength = 7.0586013[T] (300[MHz]  
X\_acq\_duration = 2.90717696[s]  
X\_domain = 1H  
X\_freq = 300.52965592[MHz]  
X\_offset = 5[ppm]  
X\_points = 16384  
X\_prescans = 0  
X\_resolution = 0.34397631[Hz]  
X\_resolution = 5.63570784[kHz]  
X\_resolution = 1H  
Irr\_domain = 300.52965592[MHz]  
Irr\_freq = 300.52965592[MHz]  
Irr\_offset = 5[ppm]  
Tri\_domain = 1H  
Tri\_freq = 300.52965592[MHz]  
Tri\_offset = 5[ppm]  
Clipped = FALSE  
X\_return = 1H  
Scan\_return = 16  
Total\_scans = 16  
X\_90\_width = 13.01[us]  
X\_acq\_time = 2.90717696[s]  
X\_angle = 45[deg]  
X\_atn = 4[db]  
X\_pulse = 0.505[us]  
Tri\_mode = Off  
Dante\_presat = FALSE  
Initial\_wait = 1[s]  
Recvr\_gain = 50  
Relaxation\_delay = 5[s]  
Repetition\_time = 7.90717696[s]  
Temp\_get = 22.1[dC]

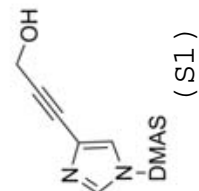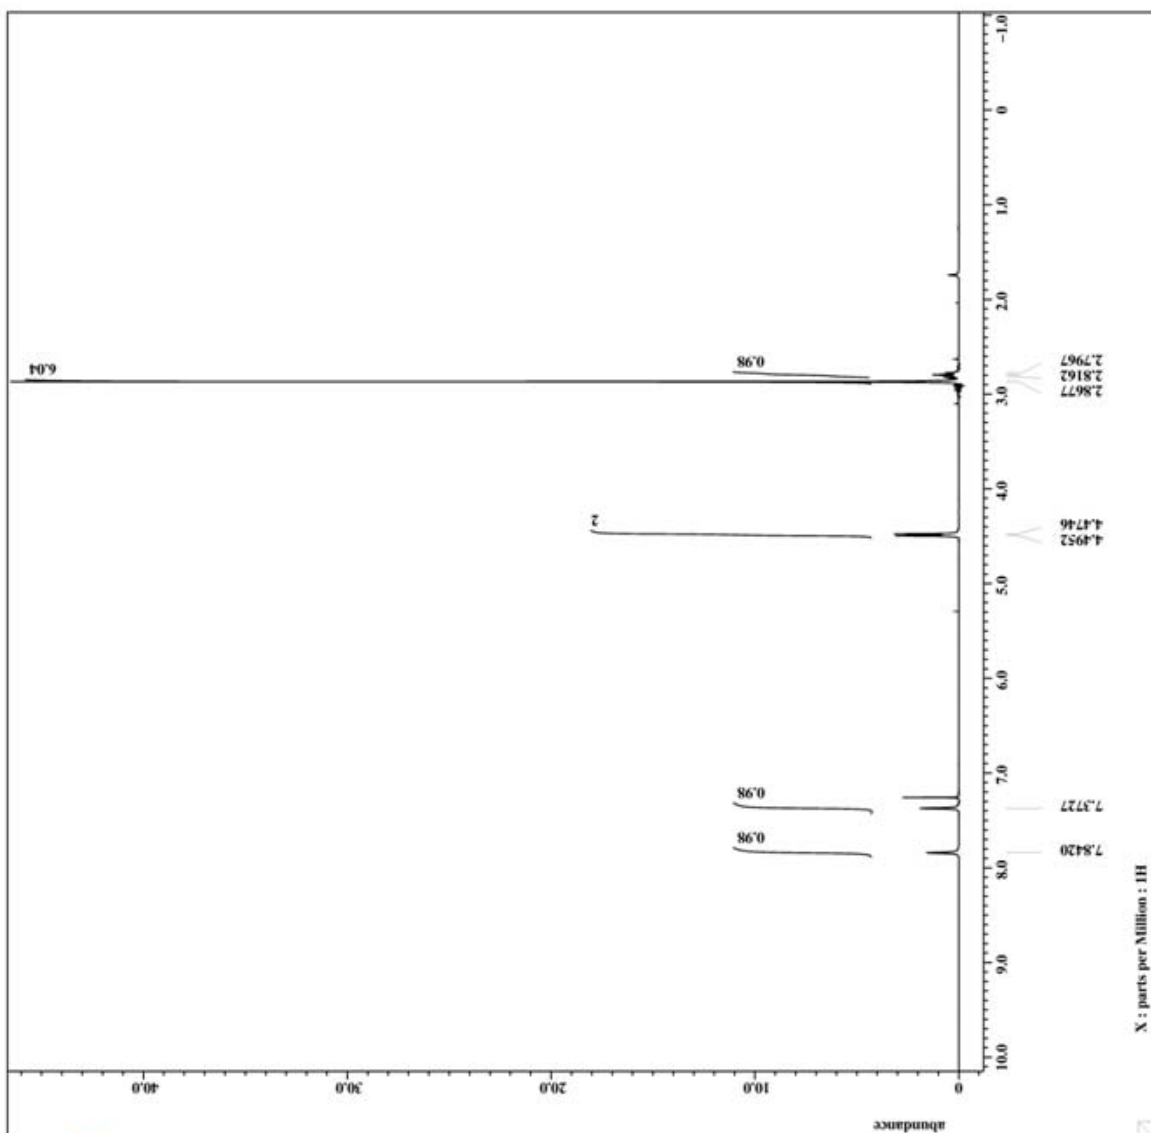





Filename = MRS\_I\_264\_dmas\_propar  
Author = delta  
Experiment = single\_pulse\_dec  
Sample\_id = S8747198  
Solvent = CHLOROFORM-D  
Creation\_time = 15-FEB-2007 21:47:41  
Revision\_time = 10-OCT-2010 10:14:11  
Current\_time = 6-NOV-2010 22:30:16  
Comment = single pulse decouple  
Data\_format = 1D COMPLEX  
Dim\_size = 52428  
Dim\_title = 13C  
Dim\_units = [ppm]  
Dimensions = X  
Site = EXC 300  
Spectrometer = DELTA2\_NMR  
Field\_strength = 7.0586013[T] (300[MHz]  
X\_acq\_duration = 2.76824064[s]  
X\_domain = 13C  
X\_freq = 75.56823426[MHz]  
X\_offset = 100[ppm]  
X\_points = 65536  
X\_prescans = 6  
X\_resolution = 6.36124027[Hz]  
X\_resolution2 = 21.67424242[kHz]  
X\_sweep = 18  
X\_domain2 = 13C  
Irr\_freq = 300.52965592[MHz]  
Irr\_offset = 5[ppm]  
Clipped = FALSE  
Mod\_return = 10  
Scans = 324  
Total\_scans = 324  
X\_90\_width = 9.75[us]  
X\_acq\_time = 2.76824064[s]  
X\_angle = 30[deg]  
X\_atn = 8[db]  
X\_pulse = 3.25[us]  
Irr\_atn\_dec = 25[db]  
Irr\_atn\_noe = 25[db]  
Irr\_noise = 10[db]  
Irr\_noise2 = 10[db]  
Recoupling = 1[us]  
Initial\_wait = TRUE  
Noe\_time = 2[s]  
Recvr\_gain = 50  
Relaxation\_delay = 2[s]  
Repetition\_time = 4.76824064[s]  
Temp\_get = 22.7[degC]

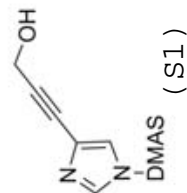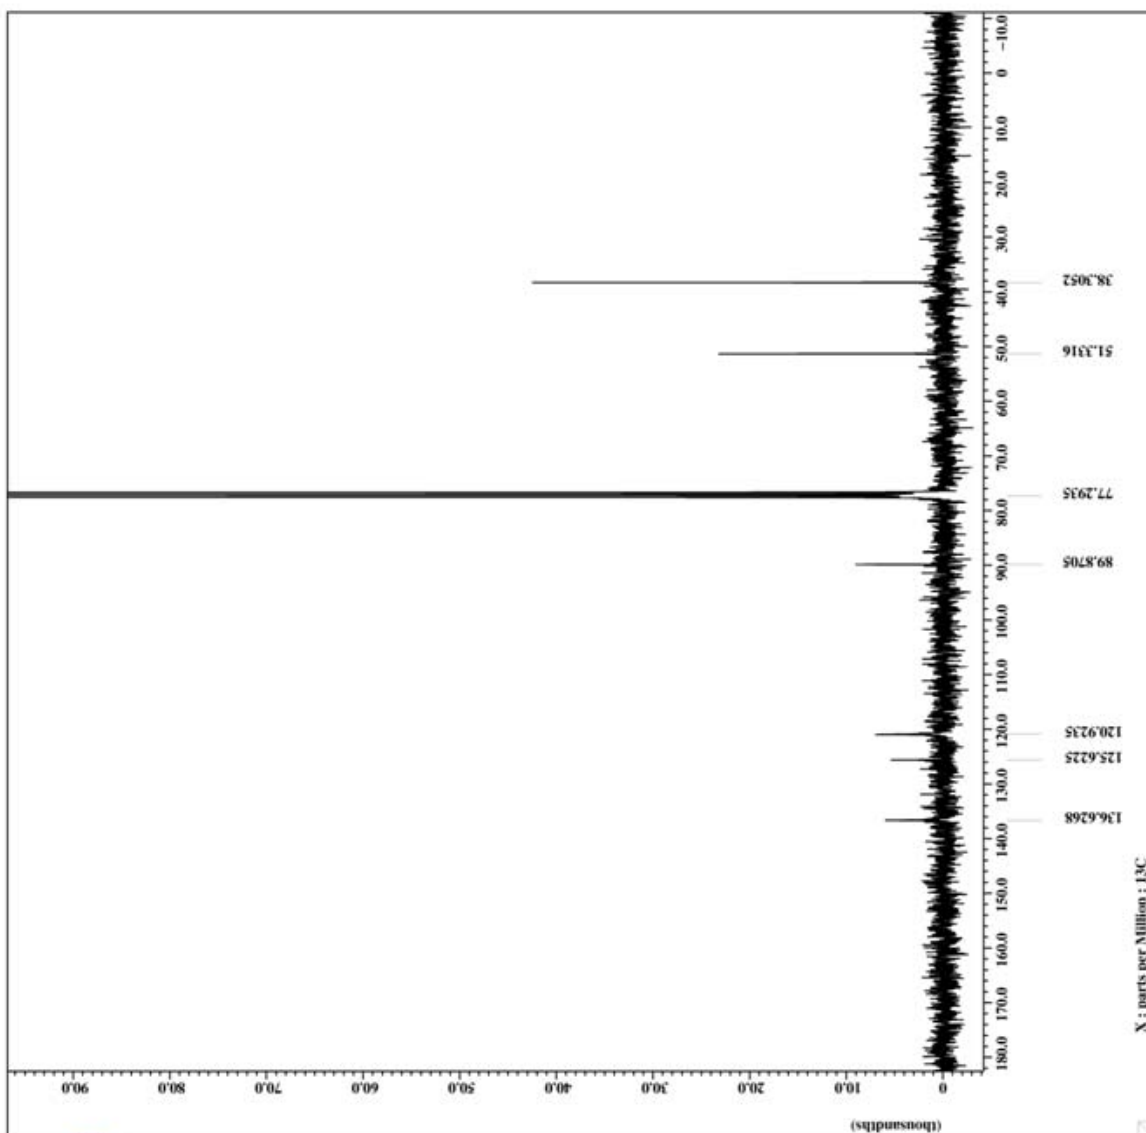

X : parts per Million : 13C

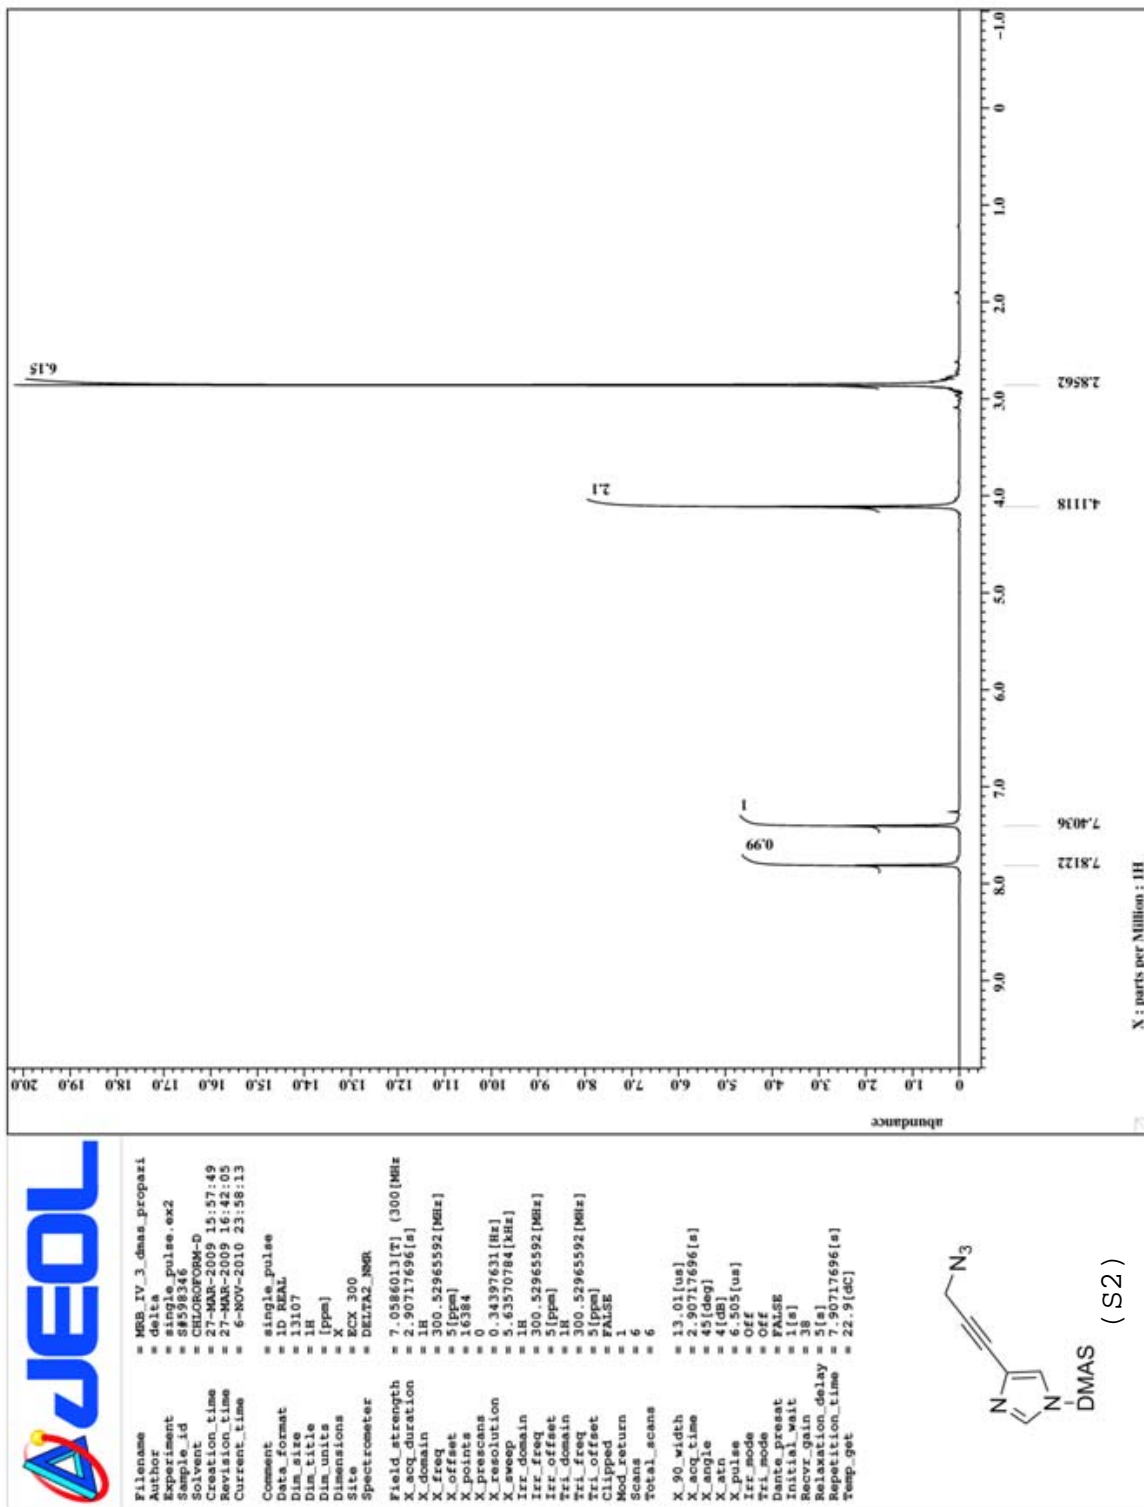

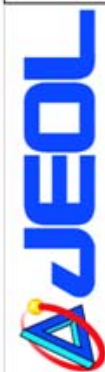

```

Filename = MSB_IV_3_dmas_propazi
Author = delta
Experiment = single_pulse_dec
Sample_id = S858918
Solvent = CHLOROFORM-D
Creation_time = 27-MAR-2009 16:03:41
Revision_time = 27-MAR-2009 16:45:05
Current_time = 6-NOV-2010 23:38:38

Comment = single pulse decouple
Data_format = 1D REAL
Dim_size = 52428
Dim_title = 13C
Dim_units = [ppm]
Dimensions = X
Site = DCX 300
Spectrometer = DELTA2_NMR

Field_strength = 7.0586013[T] (300[MHz]
X_acq_duration = 2.76824064[s]
X_domain = 13C
X_freq = 75.56823426[MHz]
X_offset = 100[ppm]
X_points = 65536
X_prescans = 1
X_resolution = 0.36124027[Hz]
X_sweep = 23.67424242[kHz]
X_domain = 1H
Irr_domain = 300.52965592[MHz]
Irr_freq = 5[ppm]
Irr_offset = FALSE
Mod_return = 10
Scans = 68
Total_scans = 68

X_90_width = 9.75[us]
X_acq_time = 2.76824064[s]
X_angle = 30[deg]
X_atn = 8[db]
X_atn = 3.25[us]
X_pulse = 25[db]
Irr_atn_dec = 15[db]
Irr_atn_noe = 15[db]
Irr_atn = 15[db]
Decoupling = TRUE
Initial_wait = 1[s]
Noe_time = TRUE
Noe_time = 2[s]
Recvr_gain = 50
Relaxation_delay = 2[s]
Repetition_time = 4.76824064[s]
Temp_get = 22.8[dc]

```

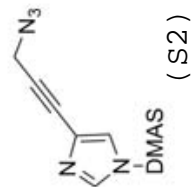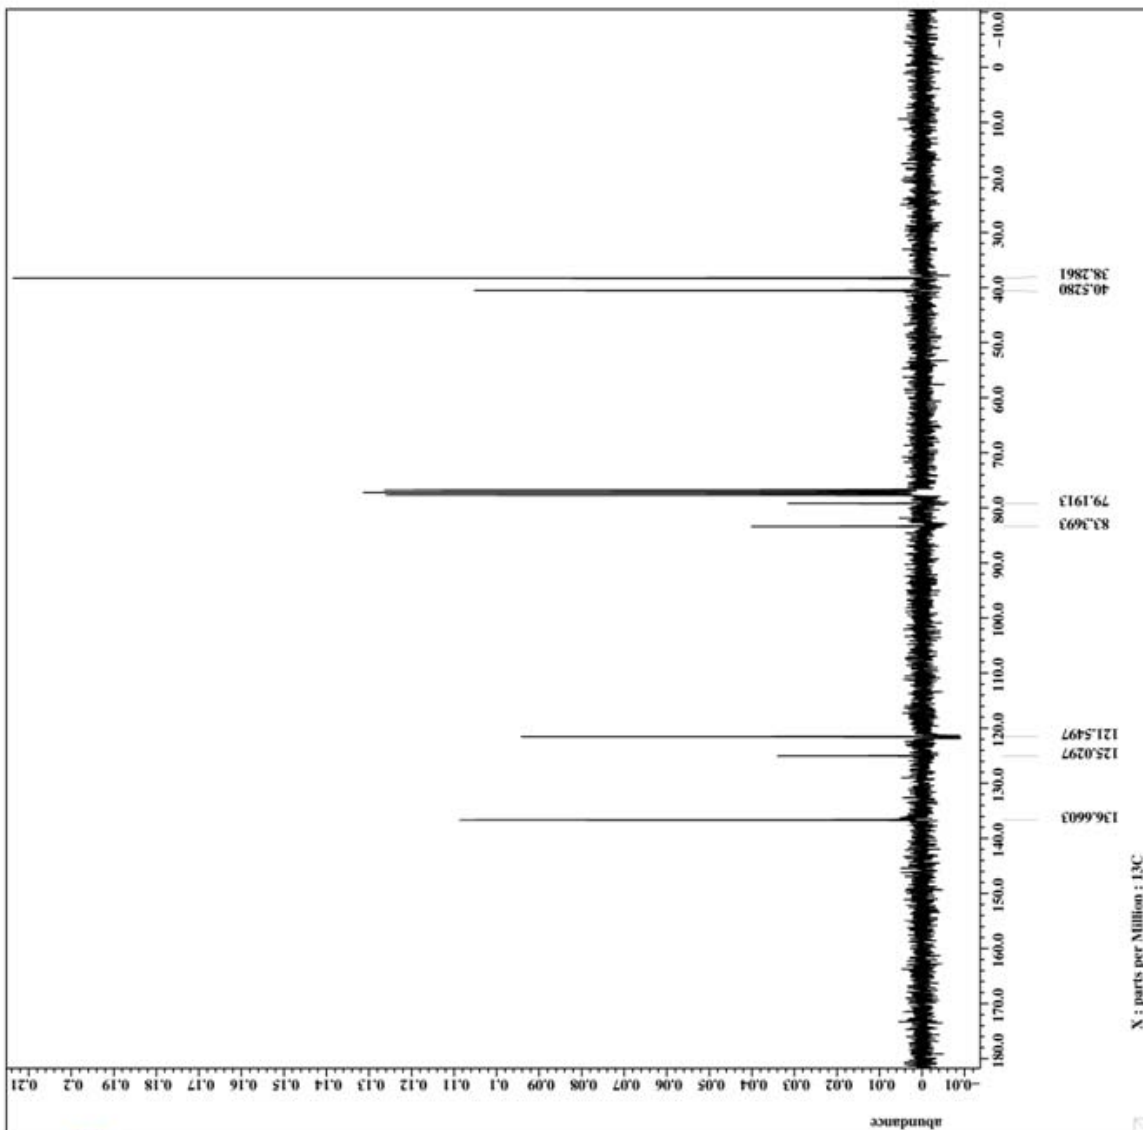

X : parts per Million : 13C



```

Filename = MSB_IV_6_dmas_propant
Author = delta
Experiment = single_pulse.ex2
Sample_id = S83419
Solvent = CHLOROFORM-D
Creation_time = 30-MAR-2009 08:54:10
Revision_time = 30-MAR-2009 09:40:01
Current_time = 6-NOV-2010 23:59:36

Comment = single_pulse
Data_format = 1D REAL
Dim_size = 13107
Dim_title = 1H
Dim_units = [ppm]
Dimensions = X
Site = DCX 300
Spectrometer = DELTA2_NMR

Field_strength = 7.0586013[T] (300)[MHz]
X_acq_duration = 2.90717696[s]
X_domain = 1H
X_freq = 300.52965592[MHz]
X_offset = 5[ppm]
X_points = 16384
X_prescans = 0
X_resolution = 0.34397631[Hz]
X_sweep = 5.63570784[kHz]
X_domain = 1H
Irr_freq = 300.52965592[MHz]
Irr_offset = 5[ppm]
Tri_domain = 1H
Tri_freq = 300.52965592[MHz]
Tri_offset = 5[ppm]
Clipped = FALSE
Mod_return = 1
Scans = 13
Total_scans = 13

X_90_width = 13.01[us]
X_acq_time = 2.90717696[s]
X_angle = 45[deg]
X_atn = 6[db]
X_pulse = 6.005[us]
X_pulse = Off
Tri_mode = Off
Dante_presat = FALSE
Initial_wait = 1[s]
Recvr_gain = 40
Relaxation_delay = 5[s]
Repetition_time = 7.90717696[s]
Temp_get = 23.2[dc]
  
```

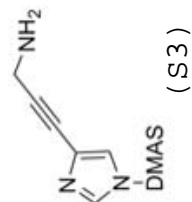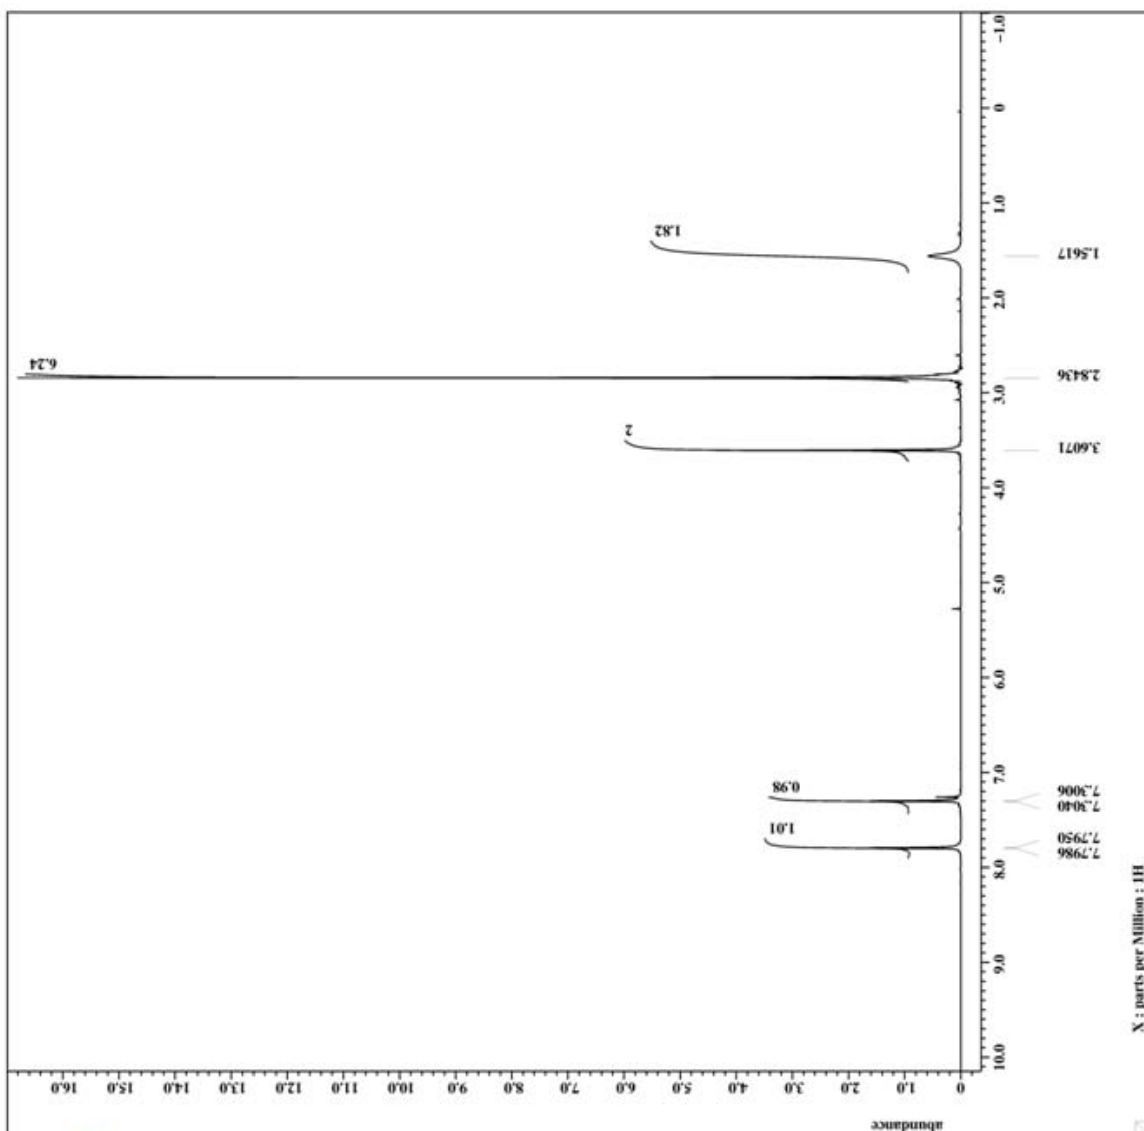



```

Filename = MSB_IV_6_dmas_propami
Author = delta
Experiment = single pulse dec
Sample_id = S8344587
Solvent = CHLOROFORM-D
Creation_time = 30-MAR-2009 09:06:29
Revision_time = 10-OCT-2010 10:06:25
Current_time = 7-NOV-2010 00:00:01

Comment = single pulse decouple
Data_format = 1D COMPLEX
Dim_size = 52428
Dim_title = 13C
Dim_units = [ppm]
Dimensions = X
Site = EXY 300
Spectrometer = DELTA2_NMR

Field_strength = 7.0586013[T] (300[MHz]
X_acq_duration = 2.76824064[s]
X_domain = 13C
X_freq = 75.56823425[MHz]
X_offset = 100[ppm]
X_points = 65536
X_prescans = 4
X_resolution = 0.36124027[Hz]
X_sweep = 23.67424242[kHz]
X_domain = 18
Irr_domain = 300.52965592[MHz]
Irr_freq = 5[ppm]
Irr_offset = FALSE
Mod_return = 10
Scans = 150
Total_scans = 150

X_90_width = 9.75[us]
X_acq_time = 2.76824064[s]
X_angle = 30[deg]
X_atn = 8[db]
X_atn = 3.25[us]
X_pulse = 25[db]
Irr_atn_dec = 25[db]
Irr_atn_noe = 25[db]
Irr_atn_noe = 25[db]
Decoupling = TRUE
Initial_wait = 1[s]
Noe_time = TRUE
Noe_time = 2[s]
Recvr_gain = 50
Relaxation_delay = 2[s]
Repetition_time = 4.76824064[s]
Temp_get = 25.4[dc]
  
```

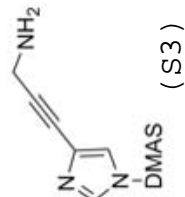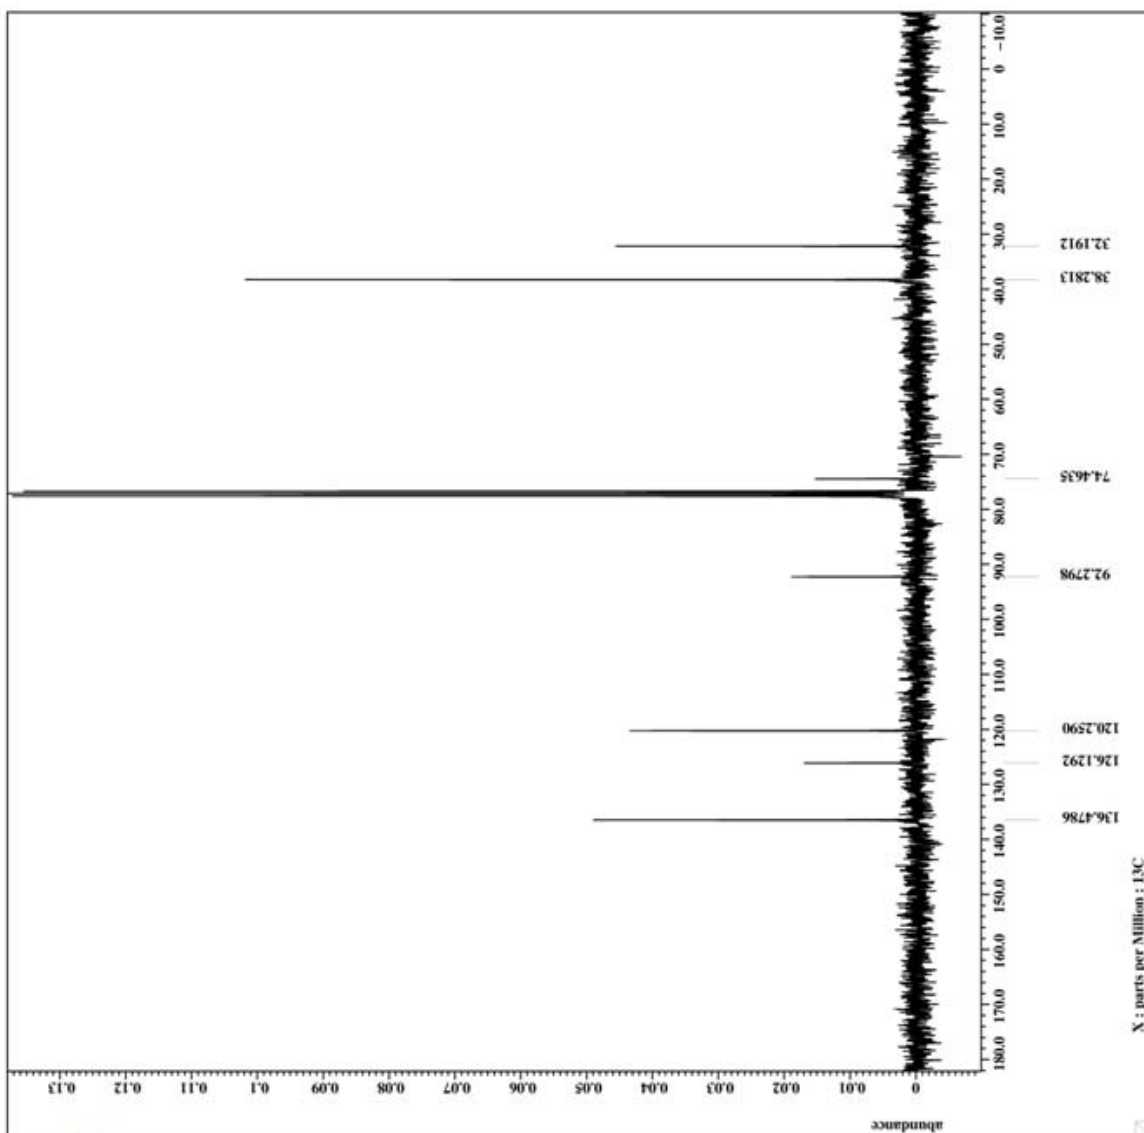



```

=====
Filename      = M88_IV_7_propacylatio
Author        = delta
Experiment    = single_pulse.ex2
Sample_id     = M88_IV_7
Solvent       = DMSO-d6
Creation time  = 8-OCT-2010 12:07:13
Revision time  = 20-OCT-2010 22:38:29
Current time   = 7-NOV-2010 00:04:13

=====
Comment       = single_pulse
Data format   = 1D REAL
Dim_size      = 13107
Dim_title     = 1H
Dim_units     = [ppm]
Dimensions    = X
Site          = DCX 300
Spectrometer  = DELTA2_NMR

=====
Field strength = 7.0586013[T] (300[MHz]
X_acq.duration = 2.90717696[s]
X_domain       = 1H
X_freq         = 300.52965592[MHz]
X_offset       = 5[ppm]
X_points       = 16384
X_prescans     = 0
X_resolution   = 0.34397631[Hz]
X_sweep        = 5.63570784[kHz]
X_domain       = 1H
Irr_domain     = 300.52965592[MHz]
Irr_freq       = 5[ppm]
Irr_offset     = 18
Tri_domain     = 300.52965592[MHz]
Tri_freq       = 5[ppm]
Tri_offset     = 5[ppm]
Clipped        = FALSE
Mod            = 1
Scales         = 12
Total_scans    = 12

=====
X_90_width     = 13.01[us]
X_acq.time      = 2.90717696[s]
X_angle         = 45[deg]
X_atn          = 6[db]
X_pulse         = 6.005[us]
X_pulses        = 6
Irr_pulse       = Off
Tri_mode        = Off
Dante_presat    = FALSE
Initial_wait    = 1[s]
Recvr_gain      = 50
Relaxation_delay = 5[s]
Repetition_time = 7.90717696[s]
Temp_get        = 20.2[dc]
=====

```

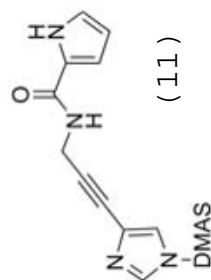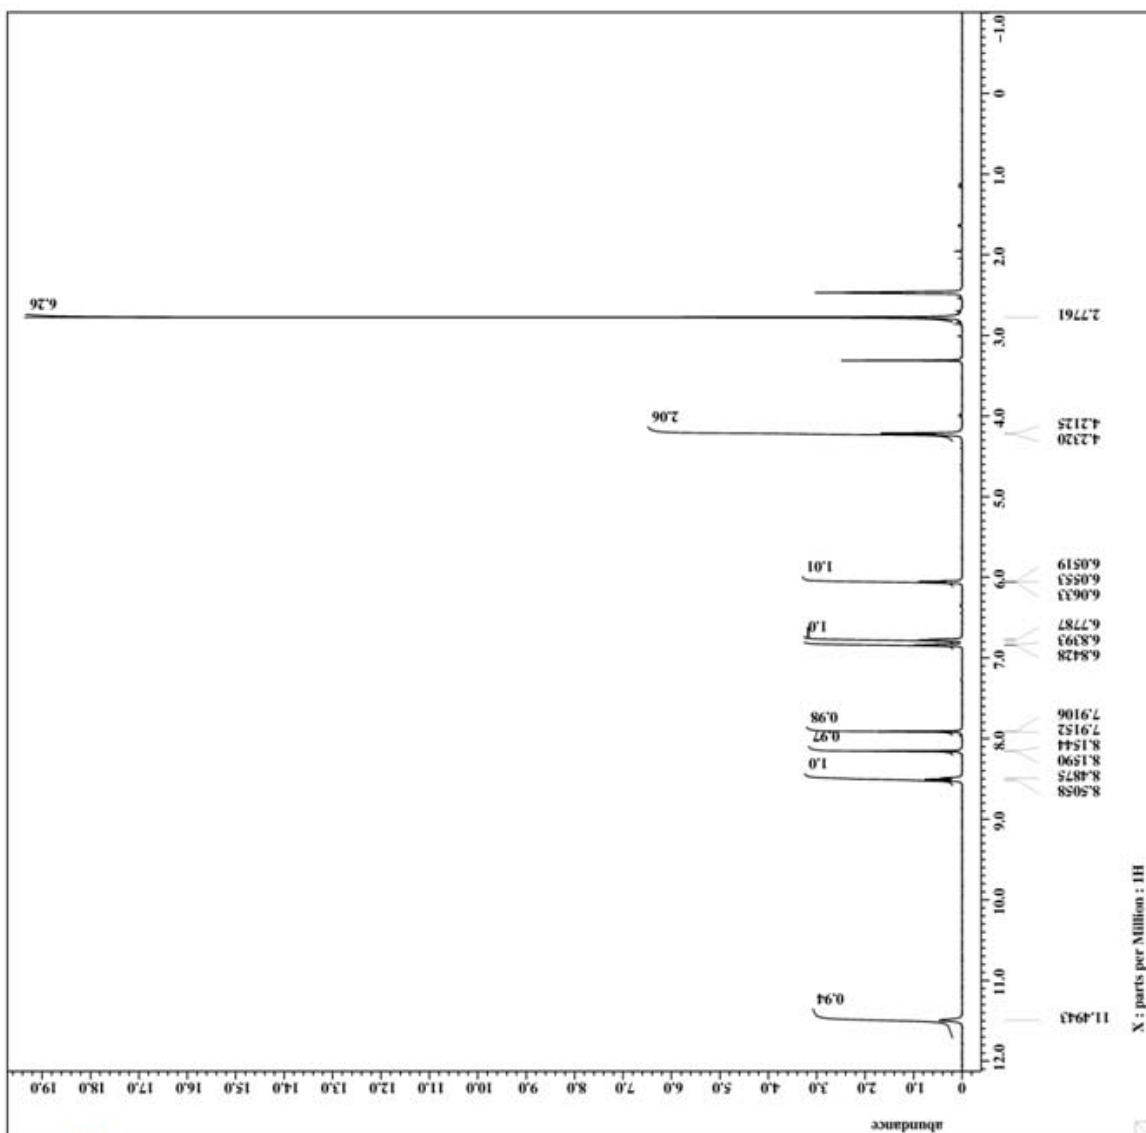



```

=====
File Name      = MSB_IV_7_propacylatio
Author         = delta
Experiment     = single_pulse_dec
Sample_id      = S8525712
Solvent        = DMSO-D6
Creation time   = 1-APR-2009 14:11:21
Revision time  = 1-APR-2009 14:52:01
Current time   = 7-NOV-2010 00:05:02
=====
Comment        = single pulse decouple
Data format    = 1D REAL
Dim_size       = 52428
Dim_title      = 13C
Dim_units      = [ppm]
Dimensions     = X
Site           = EXY 300
Spectrometer   = DELTA2_NMR
=====
Field strength = 7.0586013[T] (300[MHz]
X_acq_duration = 2.76824064[s]
X_domain       = 13C
X_freq         = 75.56823426[MHz]
X_offset       = 100[ppm]
X_points       = 65536
X_prescans     = 4
X_resolution   = 0.36124027[Hz]
X_sweep        = 23.67424242[kHz]
X_domain       = 1H
Irr_domain     = 300.52965592[MHz]
Irr_freq       = 5[ppm]
Irr_offset     = FALSE
Clipped        = 10
Mod_return     = 170
Scans          = 170
Total_scans    = 170
=====
X_90_width     = 9.75[us]
X_acq_time     = 2.76824064[s]
X_angle        = 30[deg]
X_atn          = 8[db]
X_atn          = 3.25[us]
X_pulse        = 25[db]
Irr_atn_dec    = 25[db]
Irr_atn_noe    = 25[db]
Irr_atn_noe    = TRUE
Decoupling     = 1[s]
Initial_wait   = TRUE
Noe_time       = 2[s]
Recvr_gain     = 50
Relaxation_delay = 2[s]
Repetition_time = 4.76824064[s]
Temp_get       = 25.3[dc]
=====

```

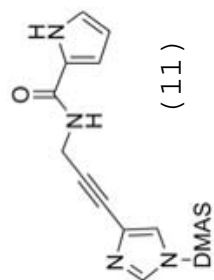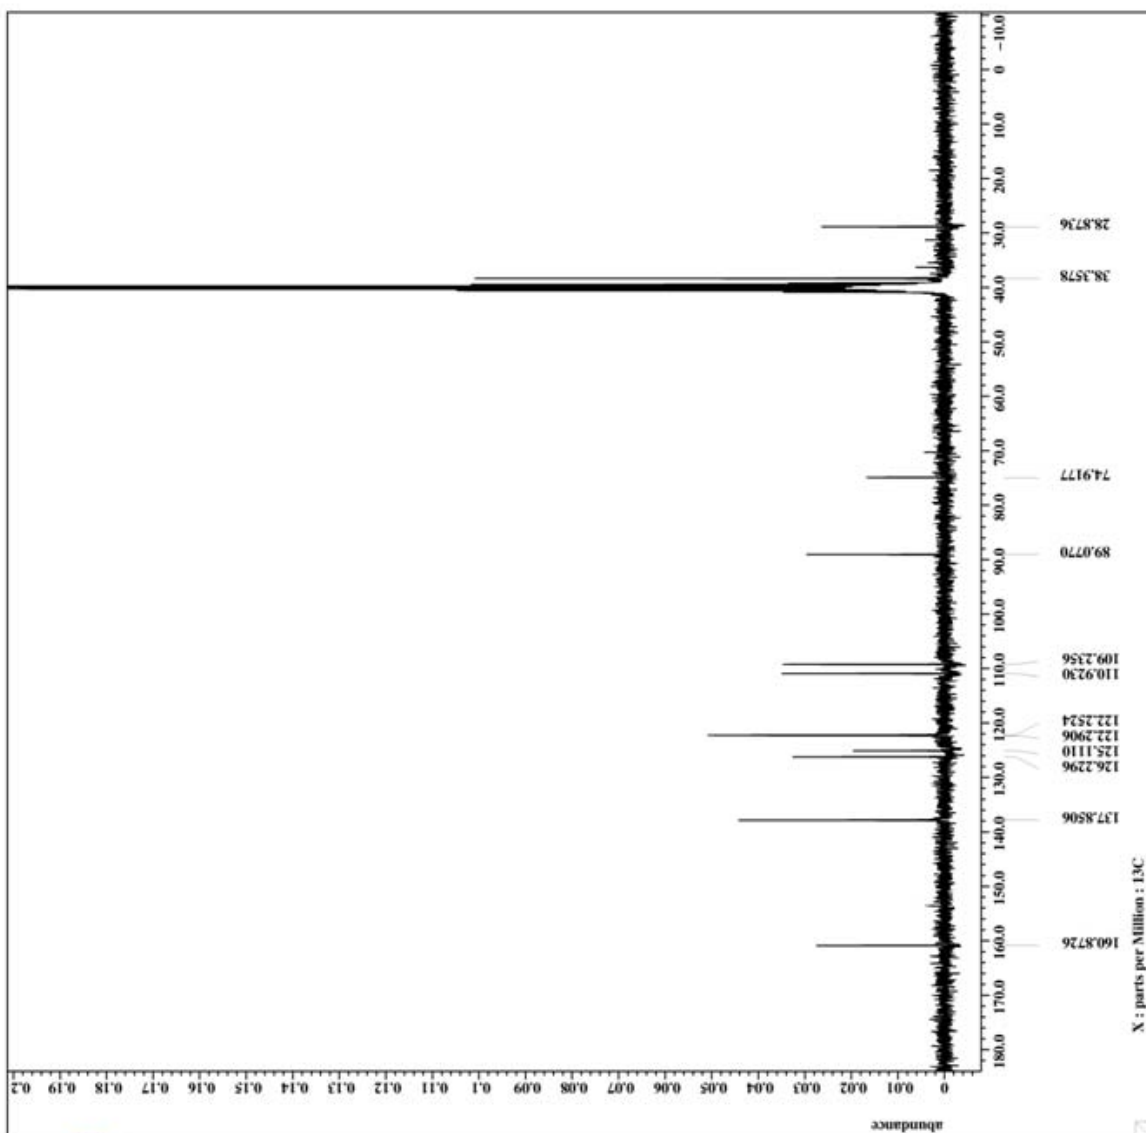



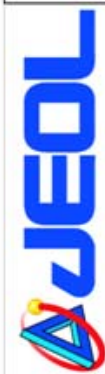

```

Filename = MSB_III_36_pdcyclizat
Author = delta
Experiment = single_pulse.ex2
Sample_id = S8606596
Solvent = DMSO-D6
Creation_time = 19-MAR-2009 17:15:42
Revision_time = 10-OCT-2010 10:35:42
Current_time = 7-NOV-2010 00:06:16

Comment = single pulse
Data_format = 1D COMPLEX
Dim_size = 13107
Dim_title = 1H
Dim_units = [ppm]
Dimensions = X
Site = DCX 300
Spectrometer = DELTA2_NMR

Field_strength = 7.0586013[T] (300[MHz]
X_acq_duration = 2.90717696[s]
X_domain = 1H
X_freq = 300.52965592[MHz]
X_offset = 5[ppm]
X_points = 16384
X_prescans = 0
X_resolution = 0.34397631[Hz]
X_sweep = 5.63570784[kHz]
Irr_domain = 1H
Irr_freq = 300.52965592[MHz]
Irr_offset = 5[ppm]
Tri_domain = 1H
Tri_freq = 300.52965592[MHz]
Tri_offset = 5[ppm]
Clipped = FALSE
Mod_return = 1
Scans = 8
Total_scans = 8

X_90_width = 13.01[us]
X_acq_time = 2.90717696[s]
X_angle = 45[deg]
X_atn = 6[db]
X_pulse = 6.005[us]
X_pulses = 1
Tri_mode = Off
Dante_preset = FALSE
Initial_wait = 1[s]
Recvr_gain = 38
Relaxation_delay = 5[s]
Repetition_time = 7.90717696[s]
Temp_get = 25[dc]

```

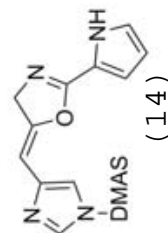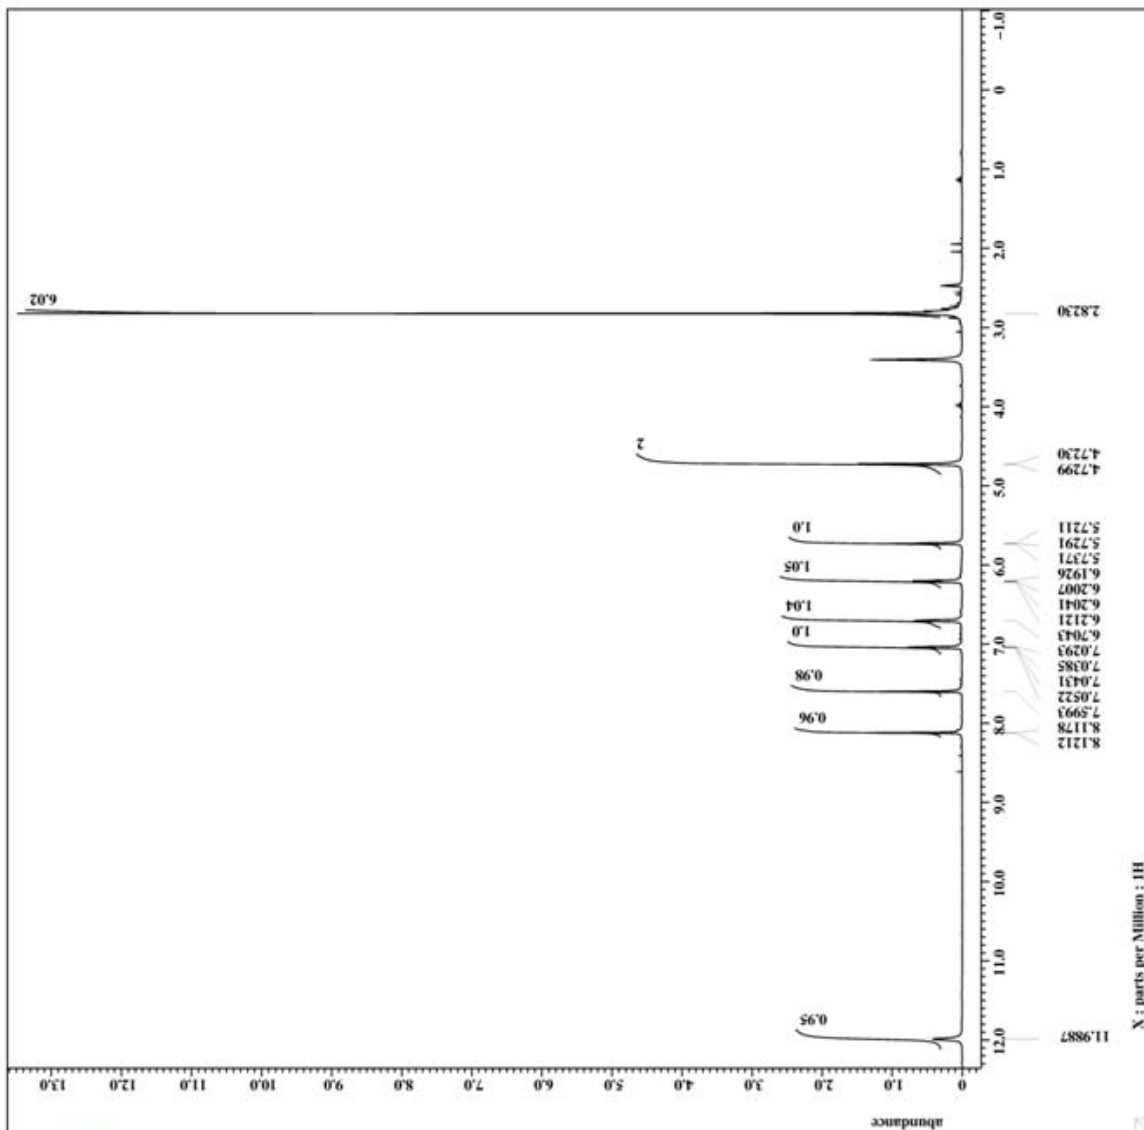





```

Filename = MSB_III_36_pdcyclizat
Author = delta
Experiment = single_pulse_dec
Sample_id = S8606896
Solvent = DMSO-d6
Creation_time = 19-MAR-2009 17:22:27
Revision_time = 10-OCT-2010 10:20:35
Current_time = 7-NOV-2010 00:07:51

Comment = single pulse decouple
Data_format = 1D COMPLEX
Dim_size = 52428
Dim_title = 13C
Dim_units = [ppm]
Dimensions = X
Site = EXX 300
Spectrometer = DELTA2_NMR

Field_strength = 7.0586013[T] (300[MHz]
X_acq_duration = 2.76824064[s]
X_domain = 13C
X_freq = 75.56823426[MHz]
X_offset = 100[ppm]
X_points = 65536
X_prescans = 4
X_resolution = 0.36124027[Hz]
X_sweep = 23.67424242[kHz]
X_domain = 18
Irr_domain = 300.52965592[MHz]
Irr_freq = 5[ppm]
Irr_offset = FALSE
Mod_return = 10
Scans = 80
Total_scans = 80

X_90_width = 9.75[us]
X_acq_time = 2.76824064[s]
X_angle = 30[deg]
X_atn = 8[db]
X_atn = 3.25[us]
X_pulse = 25[db]
Irr_atn_dec = 15[db]
Irr_atn_noe = 15[db]
Irr_atn_noe = TRUE
Decoupling = 1[s]
Initial_wait = TRUE
Noe_time = 2[s]
Noe_time = 50
Relaxation_delay = 2[s]
Repetition_time = 4.76824064[s]
Temp_get = 25[dc]

```

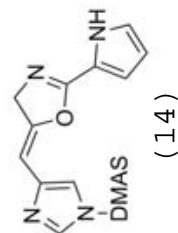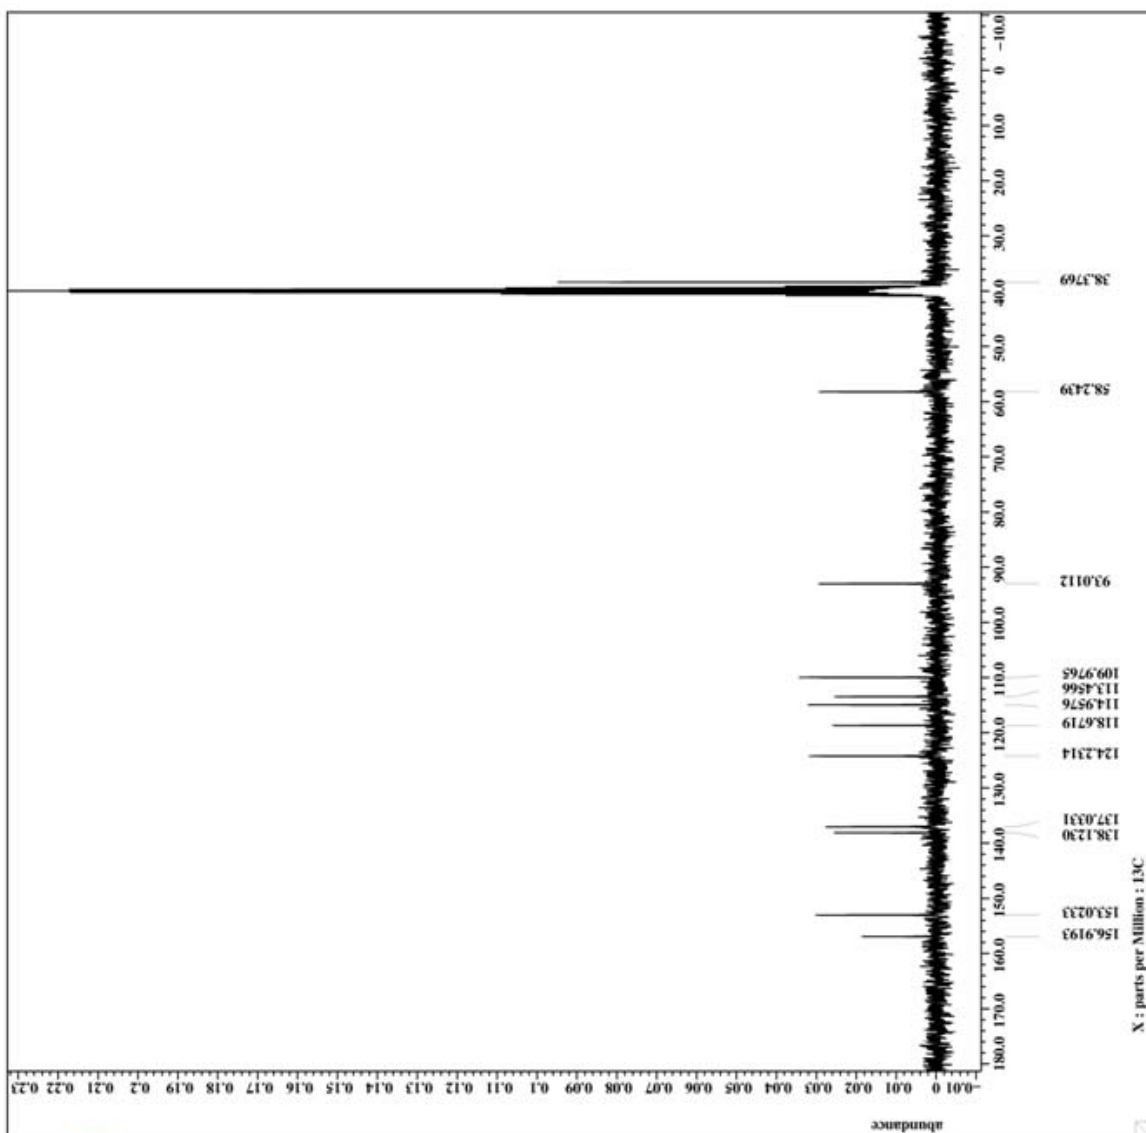



```

=====
Filename = MSB_IV_153_trityl_pro
Author = delta
Experiment = single_pulse_exp
Sample_id = S8675250
Solvent = CHLOROFORM-D
Creation_time = 28-NOV-2009 10:10:15
Revision_time = 28-NOV-2009 18:52:29
Current_time = 8-NOV-2010 23:46:15
=====
Comment = Single Pulse Experiment
Data_format = 1D REAL
Dim_size = 16384
Dim_title = 1H
Dim_units = [ppm]
Dimensions = X
Site = X
Sliceset = 500
Spectrometer = DELTA_NMR
=====
Field_strength = 11.7465928[T] (500[MH]
X_acq_duration = 2.1839872[s]
X_domain = 1H
X_freq = 500.12734003[MHz]
X_offset = 5[ppm]
X_points = 16384
X_prescan = 0.45787814[Hz]
X_resolution = 7.50187547[kHz]
X_sweep = FALSE
Clipped = FALSE
Mod_return = 1
Scans = 8
Total_scans = 8
X_90_width = 18.4[us]
X_acq_time = 2.1839872[s]
X_circ_time = 45[deg]
X_angle = 9.25[us]
X_pulse = 1[s]
Initial_wait = 3[us]
Phase_preset = 17
Recvr_gain = 4[s]
Relaxation_delay = 25.8[dc]
Temp_get = 2[us]
Unblank_time = 2[us]
=====

```

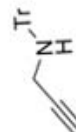

(S4)

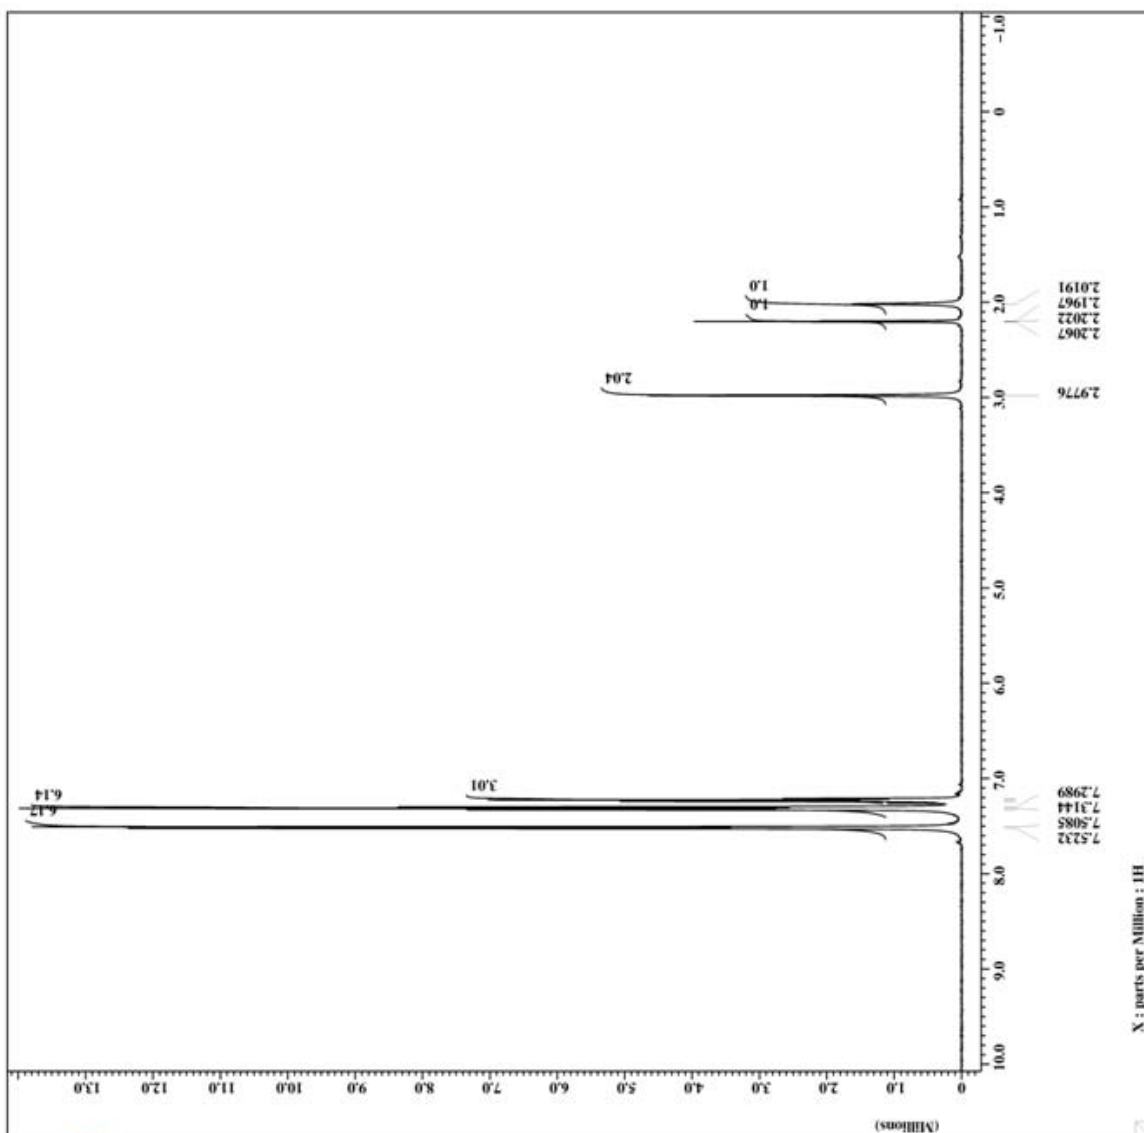

X : parts per Million : 1H



```

Filename = MSB_IV_153_trityl_pro
Author = delta
Experiment = single_pulse_dec
Sample_id = S8676648
Solvent = CHLOROFORM-D
Creation_time = 29-NOV-2009 10:24:48
Revision_time = 28-NOV-2009 19:03:18
Current_time = 8-NOV-2010 23:47:02

Comment = single pulse decouple
Data_format = 1D REAL
Dim_size = 65536
Dim_title = 13C
Dim_units = [ppm]
Dimensions = X
Site = DELTA 500
Spectrometer = DELTA_NMR

Field_strength = 11.7465928[T] (500[MH]
X_acq_duration = 2.0840448[s]
X_domain = 13C
X_freq = 125.75710665[MHz]
X_offset = 100[ppm]
X_points = 65536
X_processing = 1
X_resolution = 0.47983613[MHz]
X_sweep = 31.44654088[kHz]
Irr_domain = 1H
Irr_freq = 500.12734003[MHz]
Irr_offset = 5[ppm]
Clipped = FALSE
Mod_return = 1
Scans = 102
Total_scans = 102

X_90_width = 14.2[us]
X_acq_time = 2.0840448[s]
X_angle = 30[deg]
X_pulse = 4.7333333[us]
Initial_wait = 1[s]
Hoe_time = 1[s]
Phase_preset = 2[us]
Relaxation_delay = 3[s]
Temp_get = 27.4[dC]
Unblank_time = 2[us]

```

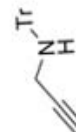

(S4)

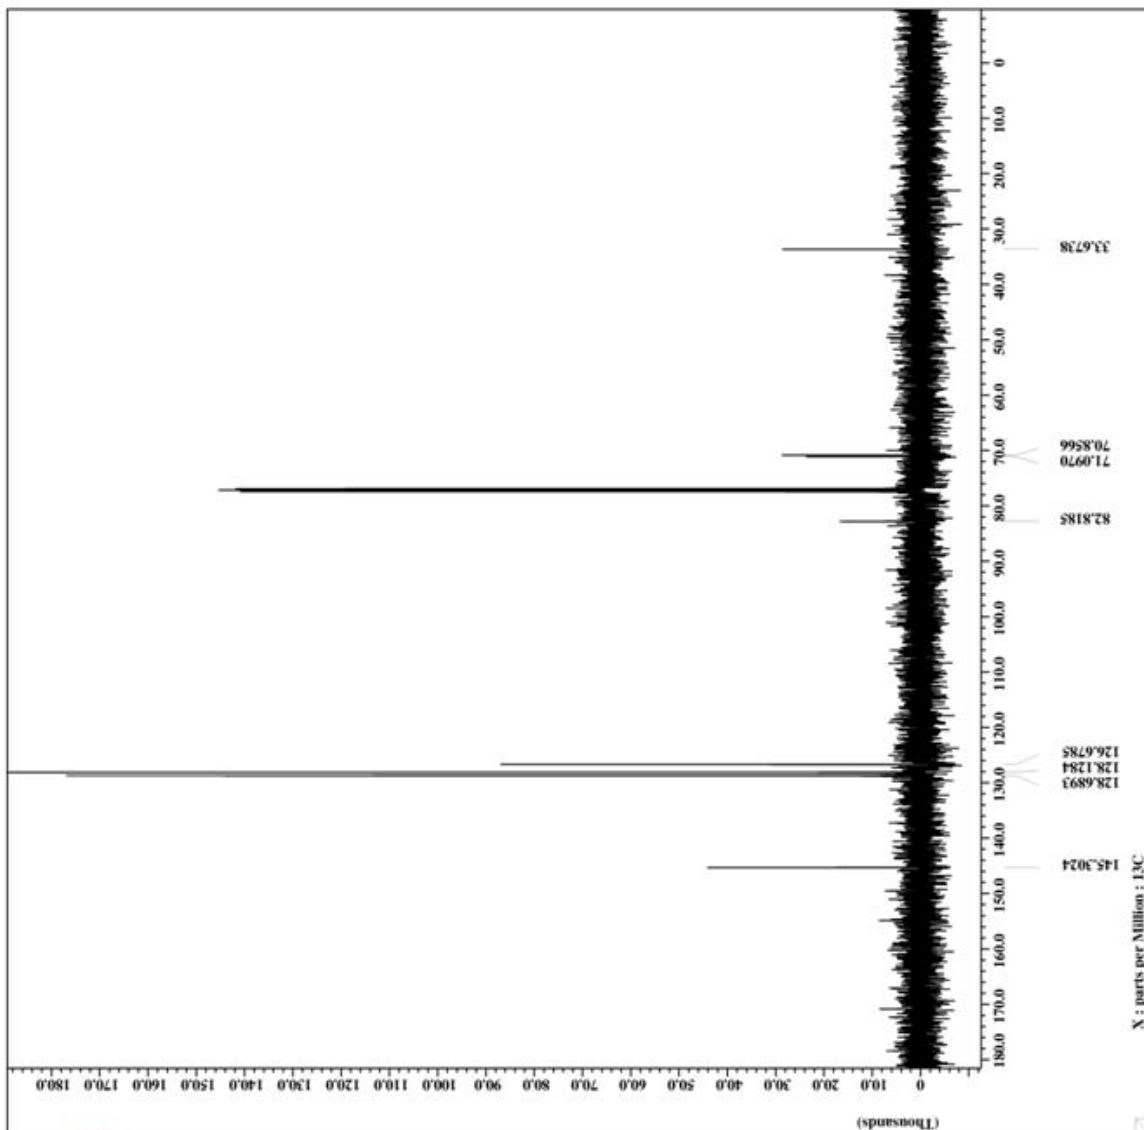

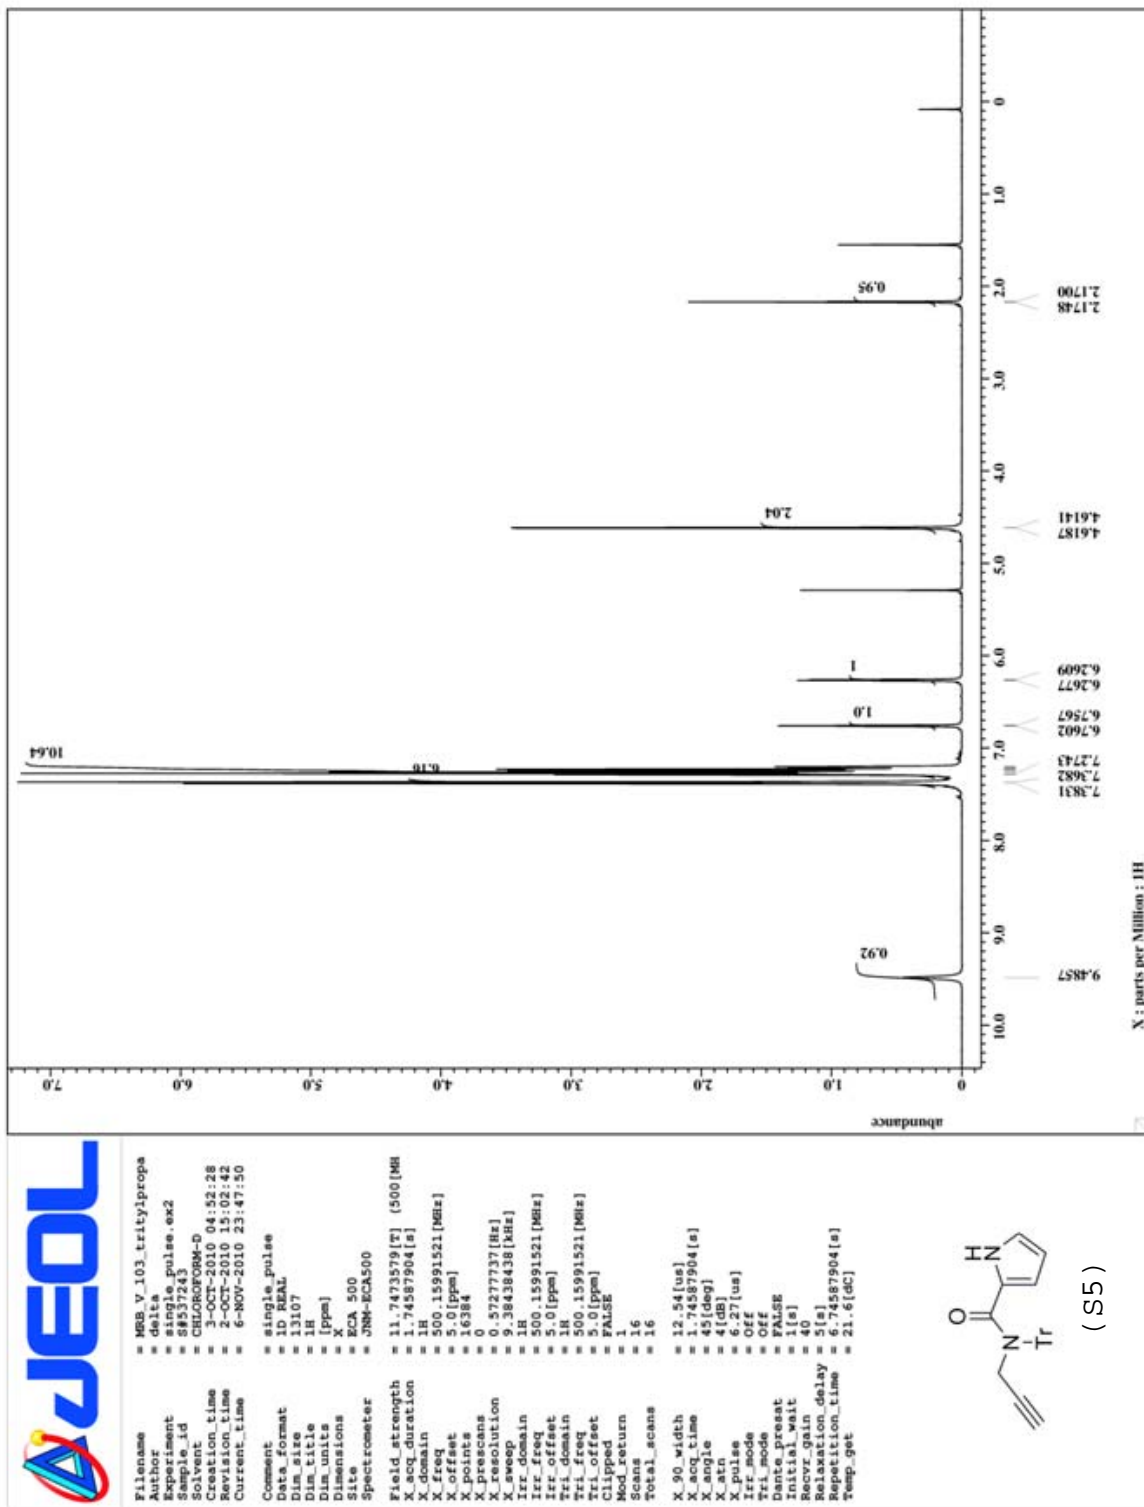

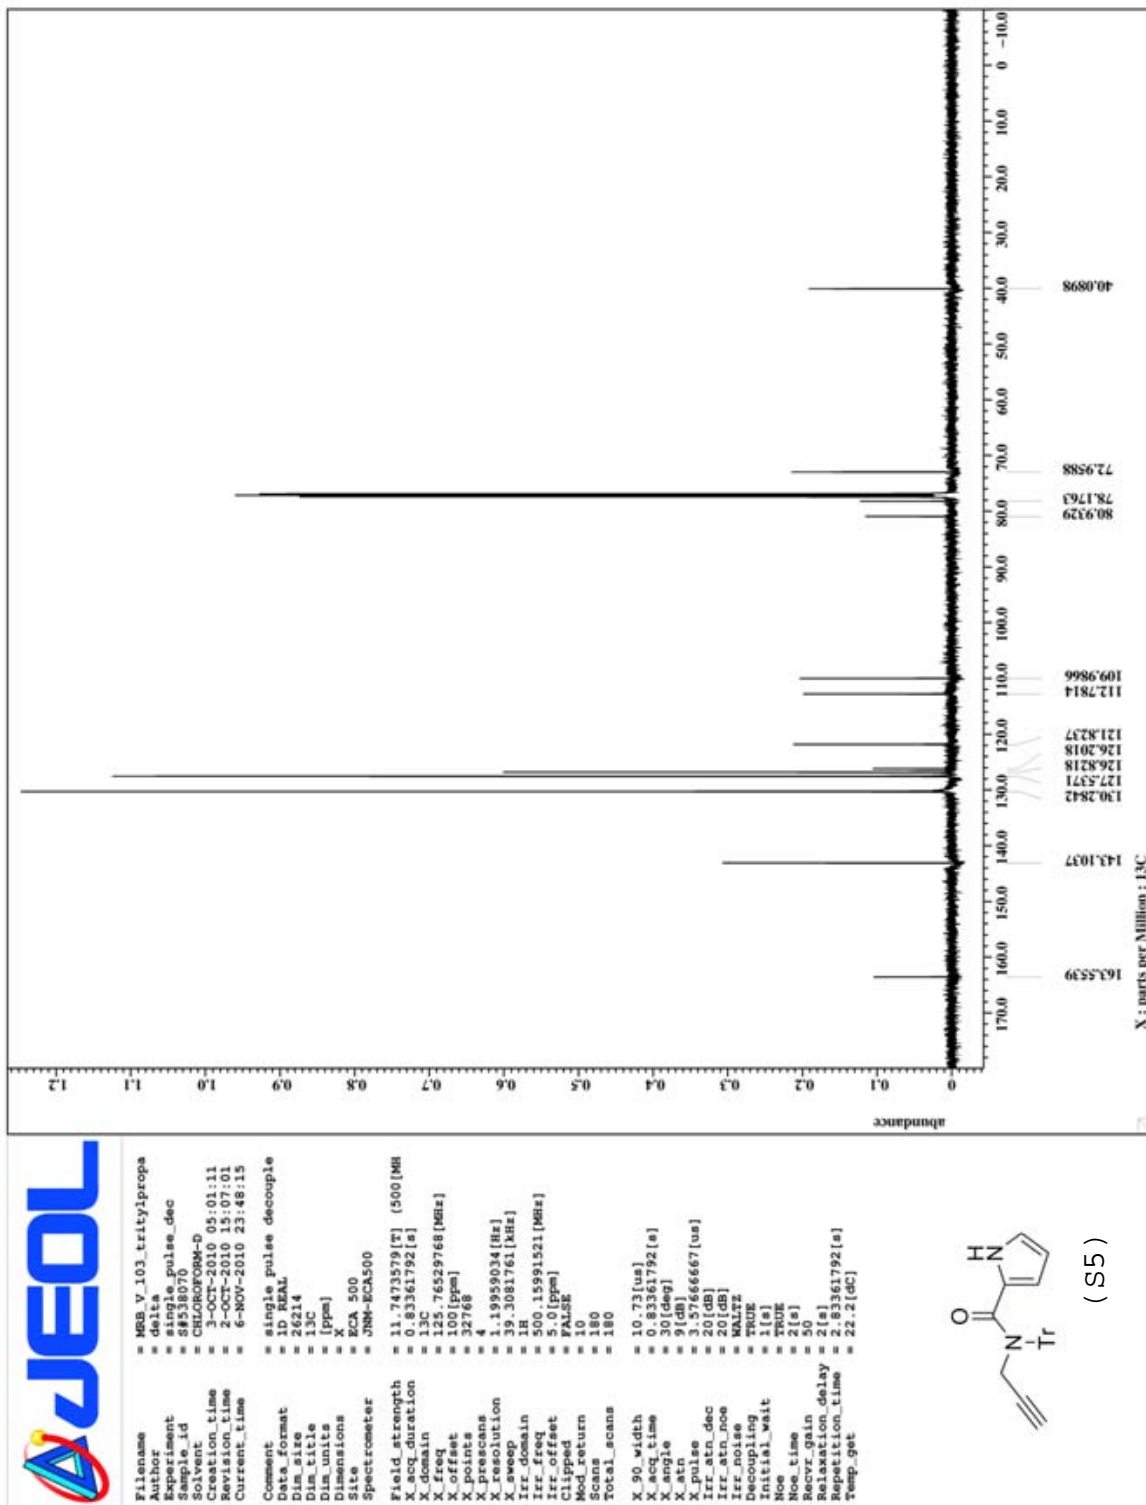

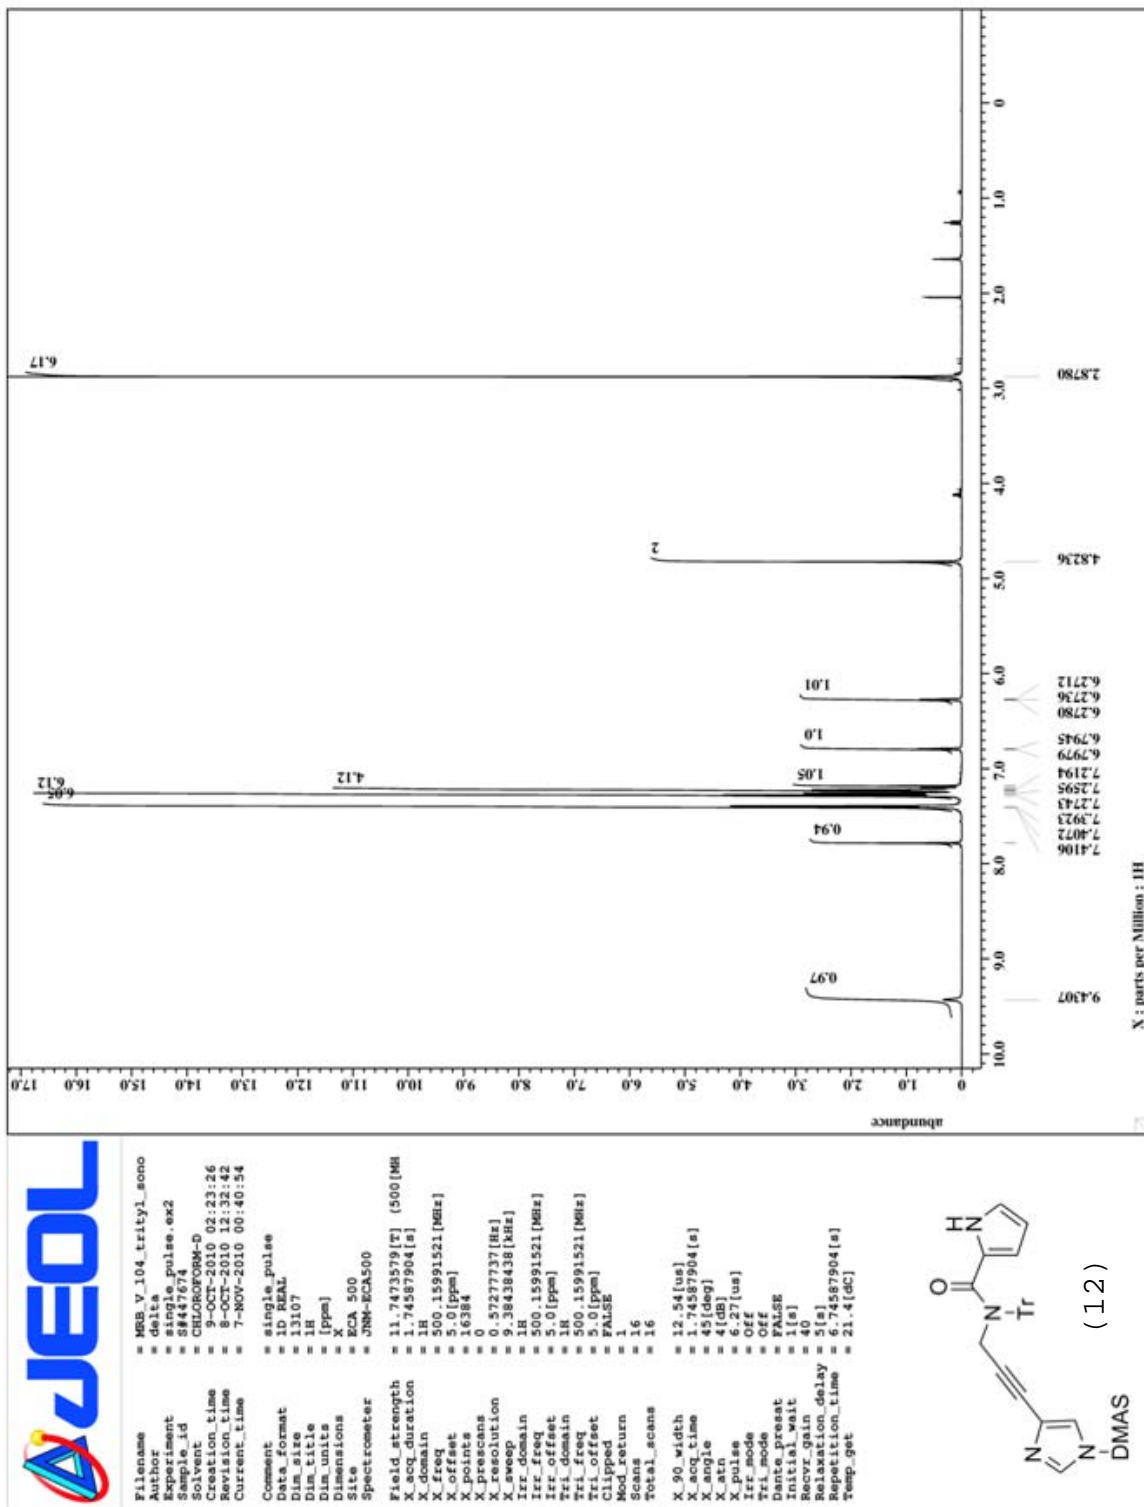

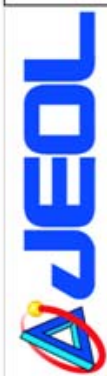

```

=====
Filename = MSB_V_104_trityl_sono
Author = delta
Experiment = single_pulse_dec
Sample_id = S8447702
Solvent = CHLOROFORM-D
Creation_time = 9-OCT-2010 02:34:32
Revision_time = 8-OCT-2010 12:40:17
Current_time = 7-NOV-2010 00:42:24
=====
Comment = single pulse decouple
Data_format = 1D REAL
Dim_size = 26214
Dim_title = 13C
Dim_units = [ppm]
Dimensions = X
Site = XCA 500
Spectrometer = JNM-ECA500
=====
Field_strength = 11.7473579[T] (500[MH]
X_acq_duration = 0.83361792[s]
X_domain = 13C
X_freq = 125.76529768[MHz]
X_offset = 100[ppm]
X_points = 32768
X_prescans = 4
X_resolution = 1.19959034[Hz]
X_sweep = 39.3081761[MHz]
X_domain = 1H
Irr_freq = 500.15991521[MHz]
Irr_offset = 5.0[ppm]
Clipped = FALSE
Mod_return = 10
Scans = 230.0
Total_scans = 230.0
=====
X_90_width = 10.73[us]
X_acq_time = 0.83361792[s]
X_angle = 30[deg]
X_atn = 9[db]
X_atn = 3.57666667[us]
X_pulse = 20[db]
Irr_atn_dec = 20[db]
Irr_atn_noe = 20[db]
Irr_offset = 5.0[ppm]
Decoupling = TRUE
Initial_wait = 1[s]
Noe_time = TRUE
Noe_time = 2[s]
Recvr_gain = 50
Relaxation_delay = 2[s]
Repetition_time = 2.83361792[s]
Temp_get = 22.1[degC]
=====

```

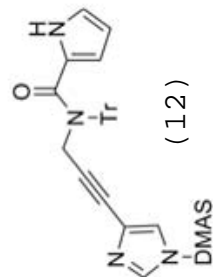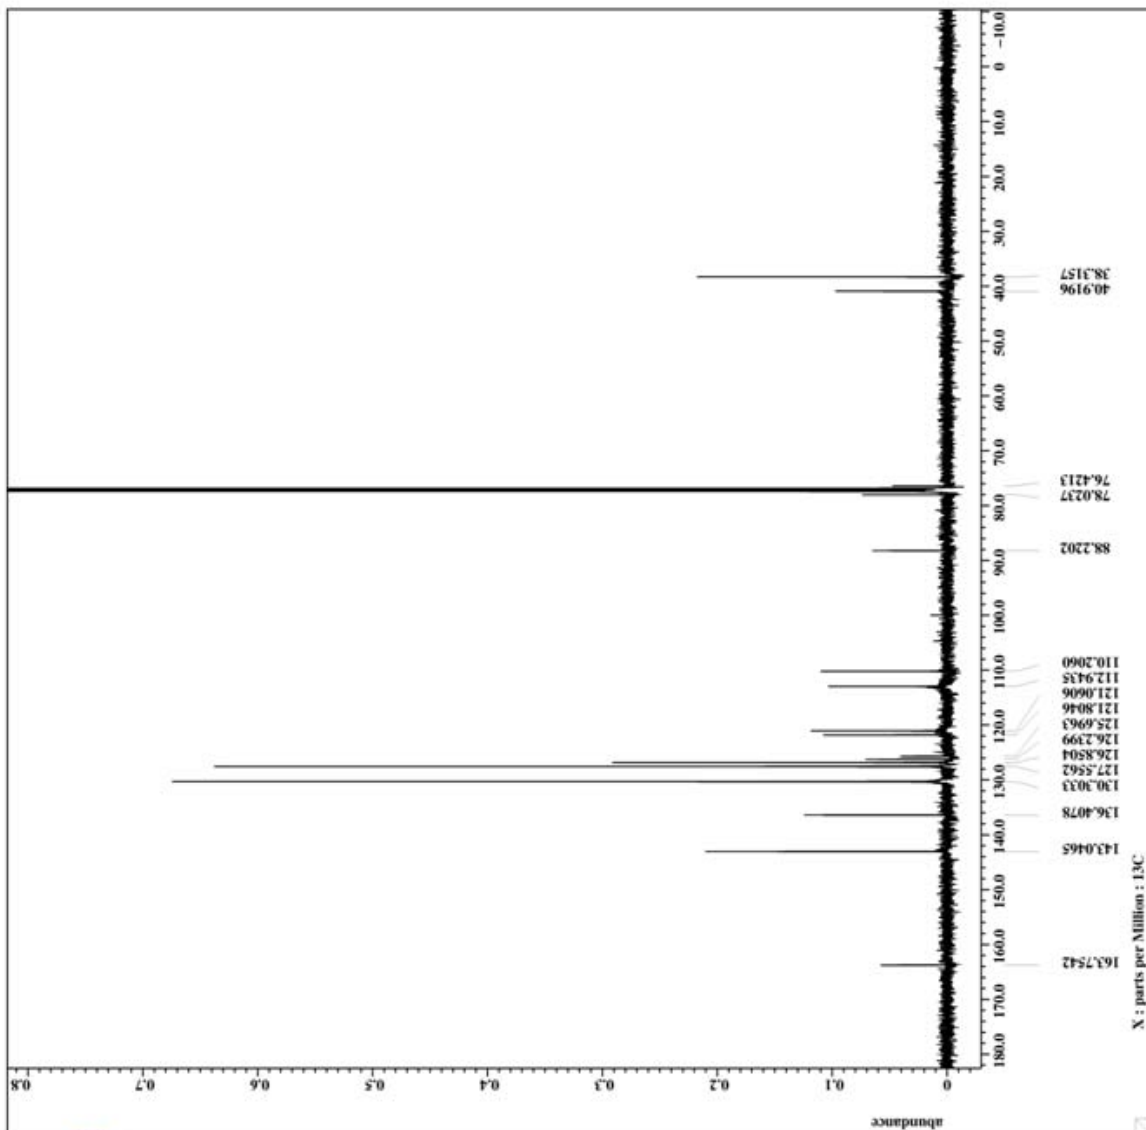



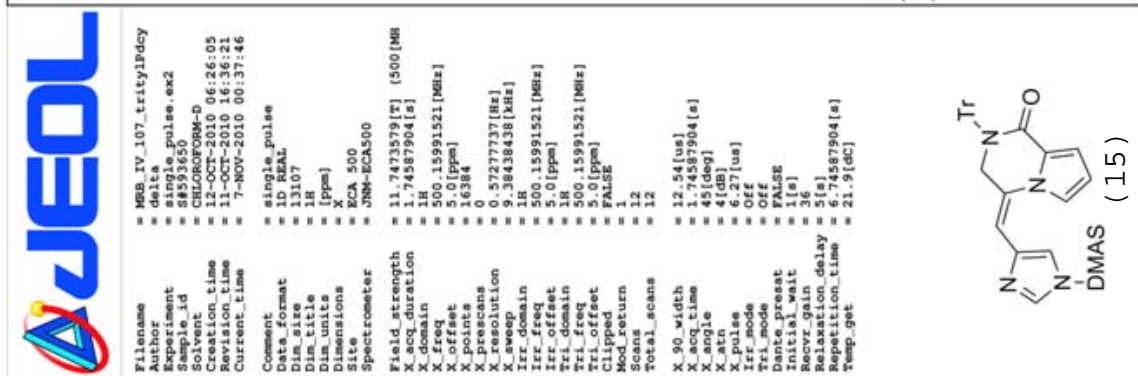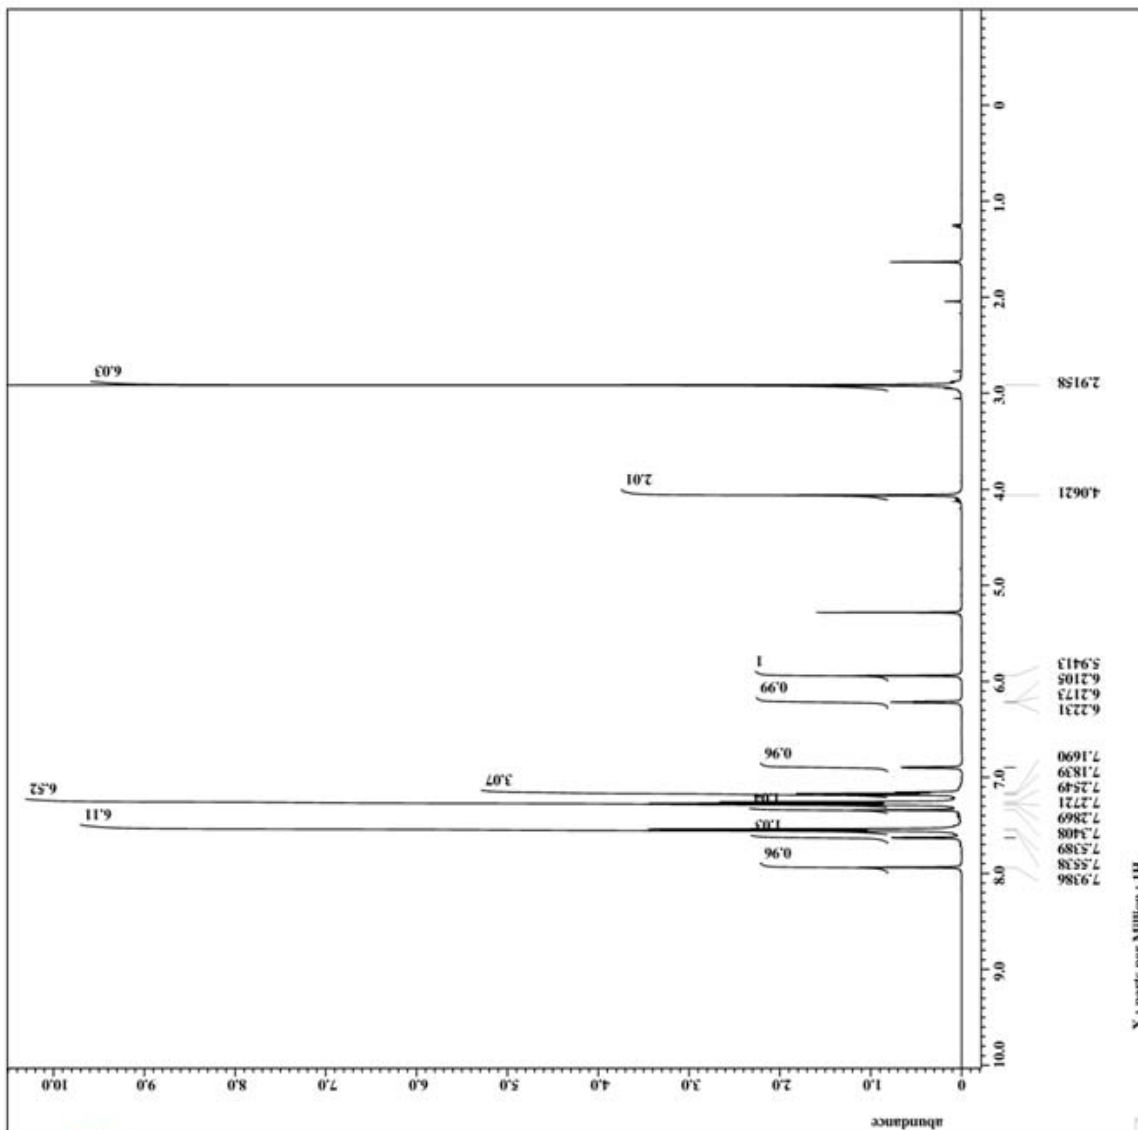



|                  |                           |
|------------------|---------------------------|
| Filename         | = MBF_IV_107_trtityIP4G7  |
| Author           | = delta                   |
| Experiment       | = single pulse.ex2        |
| Sample_id        | = 8853650                 |
| Solvent          | = CHLOROFORM-D            |
| Creation_time    | = 12-OCT-2010 06:26:03    |
| Revision_time    | = 11-OCT-2010 16:36:21    |
| Current_time     | = 6-NOV-2010 23:52:41     |
| Comment          | = single pulse            |
| Data format      | = 1D REAL                 |
| Dim.size         | = 13107                   |
| Dim.title        | = 1H                      |
| Dim.units        | = [ppm]                   |
| Dimensions       | = X                       |
| Site             | = ECA 500                 |
| Spectrometer     | = JNM-ECA500              |
| Field strength   | = 11.7473579 [T] 500 [MH] |
| X.acq.dimension  | = 1.74587904 [Hz]         |
| X.domain         | = 1H                      |
| X.freq           | = 500.15991521 [MHz]      |
| X.offset         | = 5.0 [ppm]               |
| X.points         | = 16384                   |
| X.precans        | = 0                       |
| X.resolution     | = 0.52277737 [Hz]         |
| X.sweep          | = 9.38438438 [kHz]        |
| Ir.domain        | = 500.15991521 [MHz]      |
| Ir.offset        | = 5.0 [ppm]               |
| Ir.domain        | = 1H                      |
| Tr.freq          | = 500.15991521 [MHz]      |
| Tr.offset        | = 5.0 [ppm]               |
| Mod.return       | = FALSE                   |
| Scans            | = 1                       |
| Total_scans      | = 12                      |
| X90_width        | = 12.84 [us]              |
| X.acq.time       | = 1.74587904 [s]          |
| X.angle          | = 45 [deg]                |
| X.atn            | = 4 [dB]                  |
| X.pulse          | = 6.27 [us]               |
| Ir.mode          | = Off                     |
| Tr.mode          | = Off                     |
| Dante.preset     | = FALSE                   |
| Initial.wait     | = 3 [s]                   |
| Relaxation       | = 3 [s]                   |
| Relaxation.delay | = 3 [s]                   |
| Repetition_time  | = 6.74587904 [s]          |
| Temp.set         | = 21.5 [dC]               |

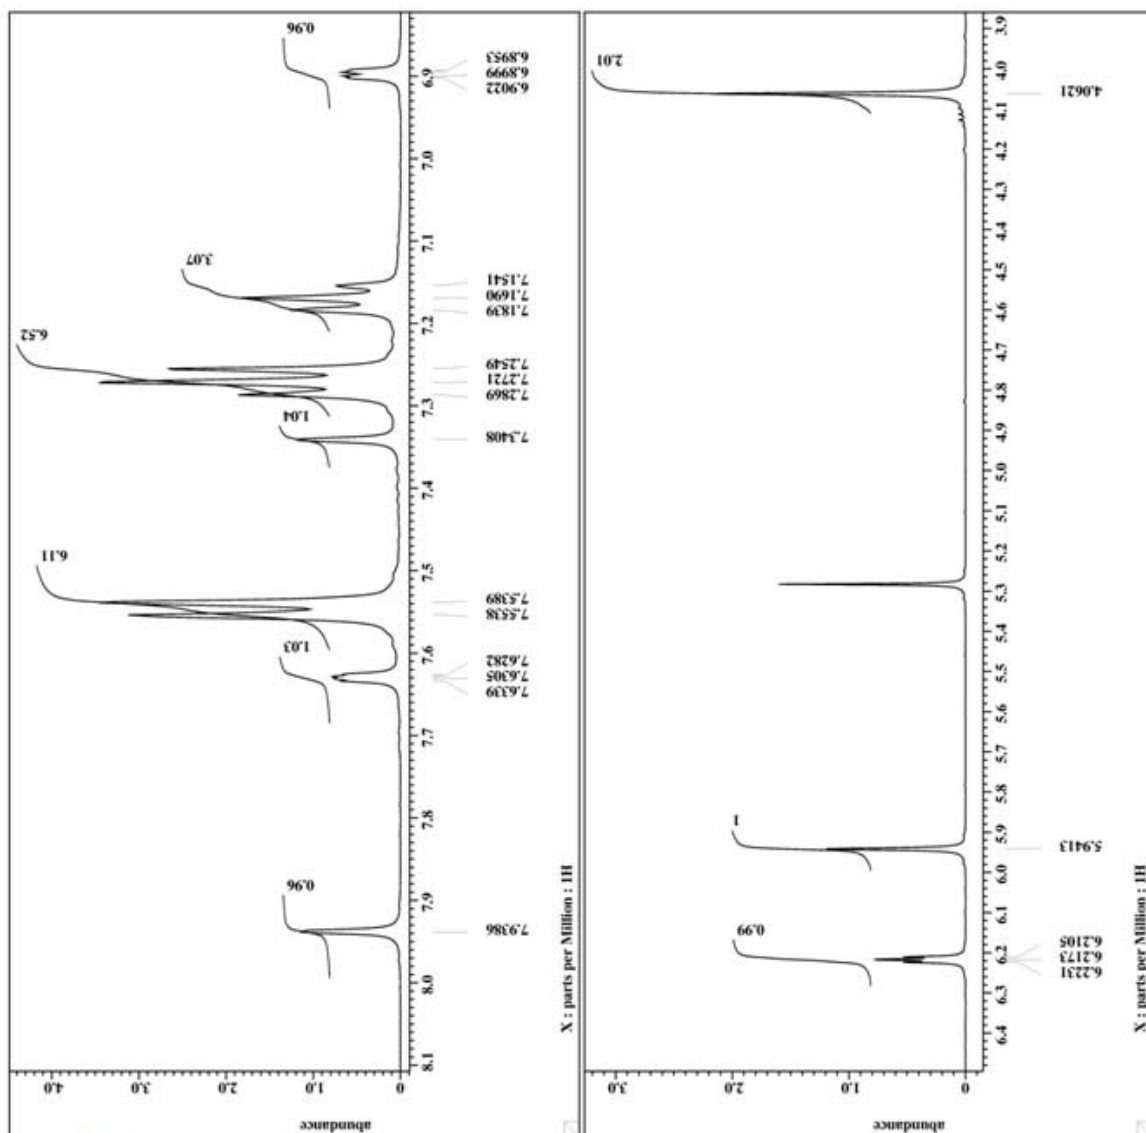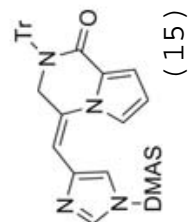



```

=====
Filename      = M88_V_104_trityl_sono
Author        = delta
Experiment    = single_pulse_dec
Sample_id     = S8447702
Solvent       = CHLOROFORM-D
Creation_time = 9-OCT-2010 02:34:32
Revision_time = 8-OCT-2010 12:40:17
Current_time  = 7-NOV-2010 00:41:20

=====
Comment       = single pulse decouple
Data_format   = 1D REAL
Dim_size      = 26214
Dim_title     = 13C
Dim_units     = [ppm]
Dimensions    = X
Site          = XCA 500
Spectrometer  = JNM-ECA500

=====
Field_strength = 11.7473579[T] (500[MH]
X_acq_duration = 0.83361792[s]
X_domain       = 13C
X_freq         = 125.76529768[MHz]
X_offset       = 100[ppm]
X_points       = 32768
X_prescans     = 1
X_resolution   = 1.19959034[Hz]
X_sweep        = 39.3081761[MHz]
X_domain      = 1H
Irr_domain     = 1H
Irr_freq       = 500.15991521[MHz]
Irr_offset     = 5.0[ppm]
Clipped        = FALSE
Mod_return     = 10
Scans          = 230.0
Total_scans    = 230.0

=====
X_90_width    = 10.73[us]
X_acq_time     = 0.83361792[s]
X_angle        = 30[deg]
X_atn          = 9[db]
X_pulse        = 3.57666667[us]
Irr_atn_dec    = 20[db]
Irr_atn_noe    = 30[db]
Irr_atn_noe2   = 40[db]
Decoupling     = TRUE
Initial_wait   = 1[s]
Noe_time       = TRUE
Noe_time       = 2[s]
Recvr_gain     = 50
Relaxation_delay = 2[s]
Repetition_time = 2.83361792[s]
Temp_get       = 22.1[dc]
=====

```

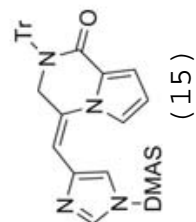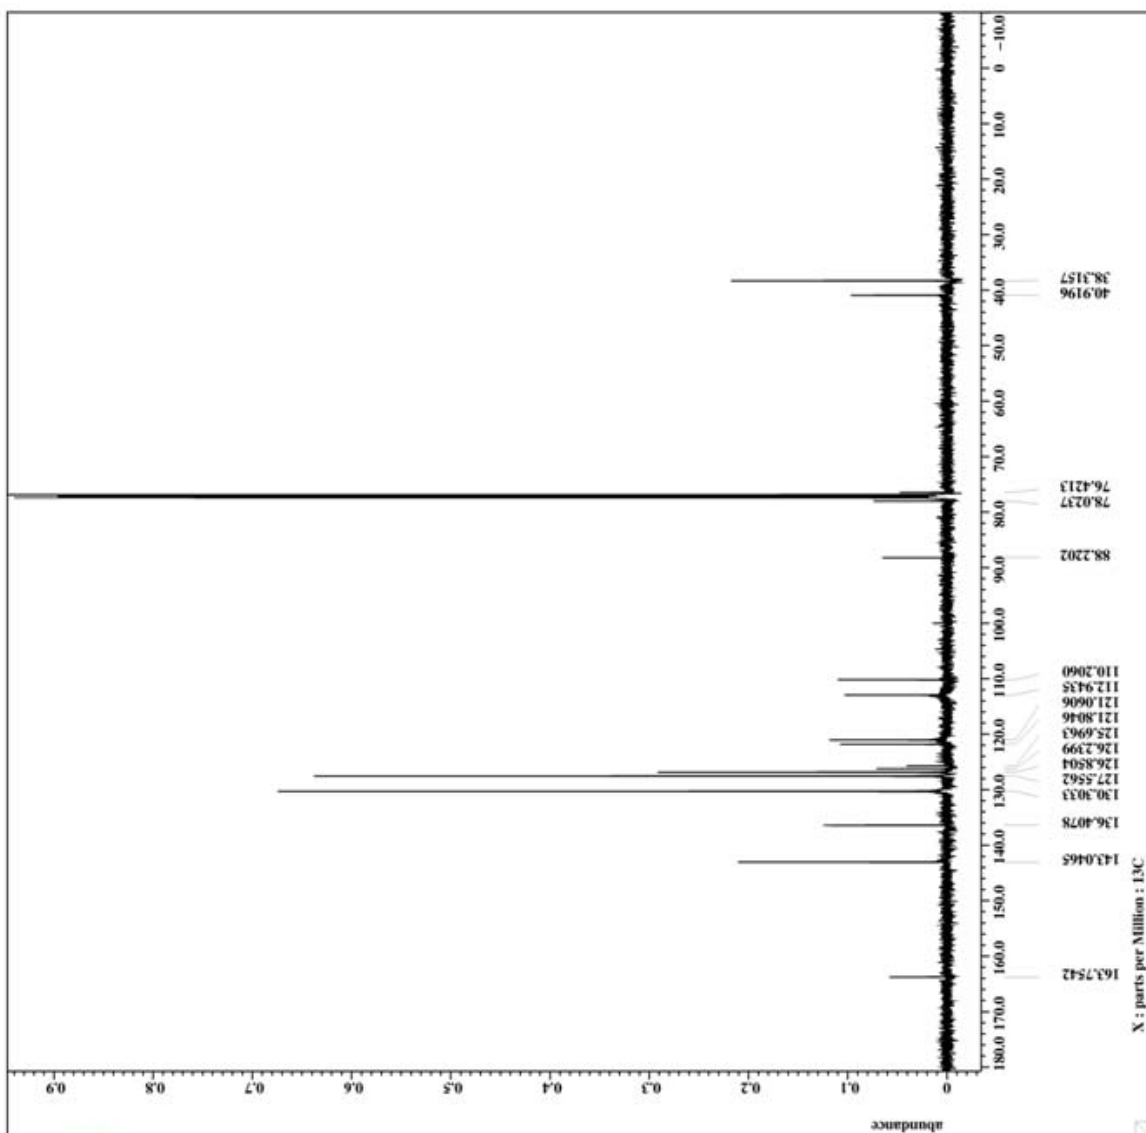

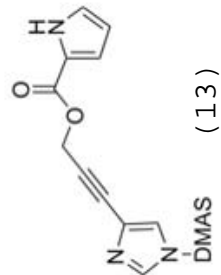



```

=====
File Name      = MRS_IV_10_propaster_o
Author         = delta
Experiment     = single_pulse_dec
Sample_id      = S8575928
Solvent        = CHLOROFORM-D
Creation_time   = 2-APR-2009 17:00:06
Revision_time  = 10-OCT-2010 10:23:24
Current_time   = 6-NOV-2010 23:43:43
=====
Comment        = single pulse decouple
Data Format     = 1D COMPLEX
Data Size      = 52428
Dim. Size      = 13C
Dim. Title     = [ppm]
Dim. Units     = X
Dimensions     = X
Site           = EXY 300
Spectrometer   = DELTA2_NMR
=====
Field strength = 7.0586013[T] (300[MHz]
X_acq_duration = 2.76824064[s]
X_domain       = 13C
X_freq         = 75.56823426[MHz]
X_offset       = 100[ppm]
X_points       = 65536
X_prescans     = 4
X_resolution   = 0.36124027[Hz]
X_sweep        = 23.67424242[kHz]
X_domain       = 1H
Irr_domain     = 1H
Irr_freq       = 300.52965592[MHz]
Irr_offset     = 5[ppm]
Clipped        = FALSE
Mod_return     = 10
Scans          = 1221
Total_scans    = 1221
=====
X_90_width     = 9.75[us]
X_acq_time     = 2.76824064[s]
X_angle        = 30[deg]
X_atn          = 8[db]
X_atn          = 3.25[us]
X_pulse        = 25[db]
Irr_atn_dec    = 25[db]
Irr_atn_noe    = 15[db]
Irr_atn_noe    = 15[db]
Decoupling     = TRUE
Initial_wait   = 1[s]
Noe_time       = TRUE
Noe_time       = 2[s]
Recvr_gain     = 50
Relaxation_delay = 2[s]
Repetition_time = 4.76824064[s]
Temp_get       = 25.3[dc]
=====

```

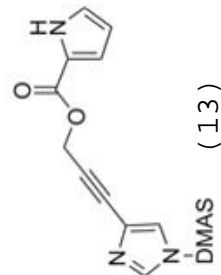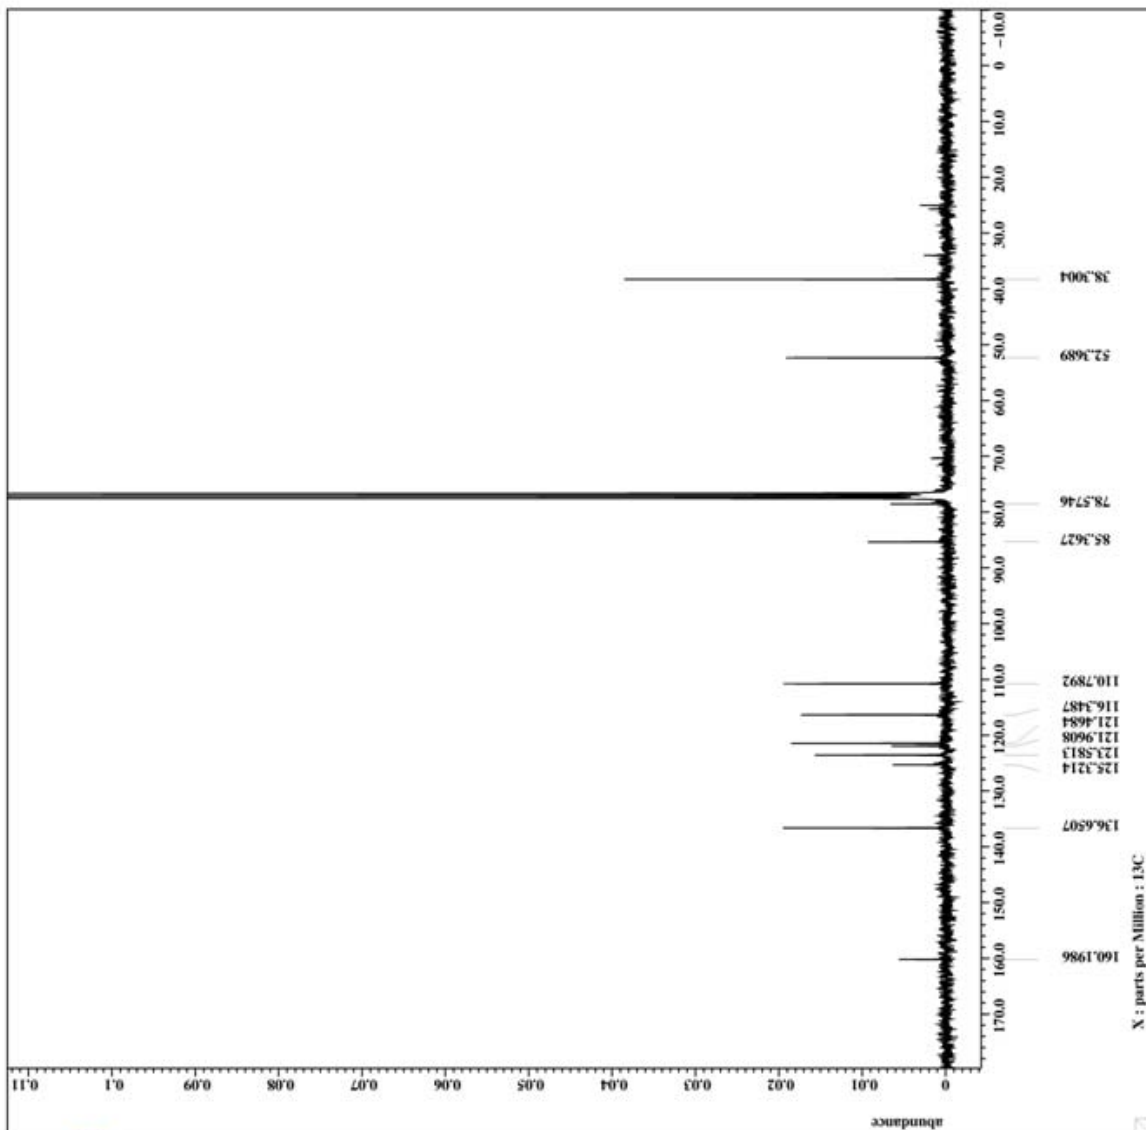

X : parts per Million : 13C

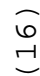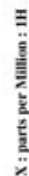



```

=====
Filename = MSB_V_111_estercycliz
Author = delta
Experiment = single_pulse_dec
Sample_id = S8704337
Solvent = CHLOROFORM-D
Creation_time = 29-SEP-2010 09:38:12
Revision_time = 28-SEP-2010 19:40:33
Current_time = 6-NOV-2010 23:45:10
=====
Comment = single pulse decouple
Data_format = 1D REAL
Dim_size = 26214
Dim_title = 13C
Dim_units = [ppm]
Dimensions = X
Site = XCA 500
Spectrometer = JNM-ECA500
=====
Field_strength = 11.7473579[T] (500[MH]
X_acq_duration = 0.83361792[s]
X_domain = 13C
X_freq = 125.76529768[MHz]
X_offset = 100[ppm]
X_points = 32768
X_prescans = 4
X_resolution = 1.19959034[Hz]
X_sweep = 39.3081761[kHz]
X_domain = 1H
Irr_domain = 1H
Irr_freq = 500.15991521[MHz]
Irr_offset = 5.0[ppm]
Clipped = FALSE
Mod_return = 10
Scans = 90
Total_scans = 90
=====
X_90_width = 10.73[us]
X_acq_time = 0.83361792[s]
X_angle = 30[deg]
X_atn = 9[db]
X_pulse = 3.57666667[us]
Irr_atn_dec = 20[db]
Irr_atn_noe = 30[db]
Irr_atn_noe = 30[db]
Decoupling = TRUE
Initial_wait = 1[s]
Noe_time = TRUE
Noe_time = 2[s]
Recvr_gain = 50
Relaxation_delay = 2[s]
Repetition_time = 2.83361792[s]
Temp_get = 22.2[dc]
=====

```

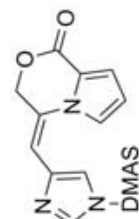

( 16 )

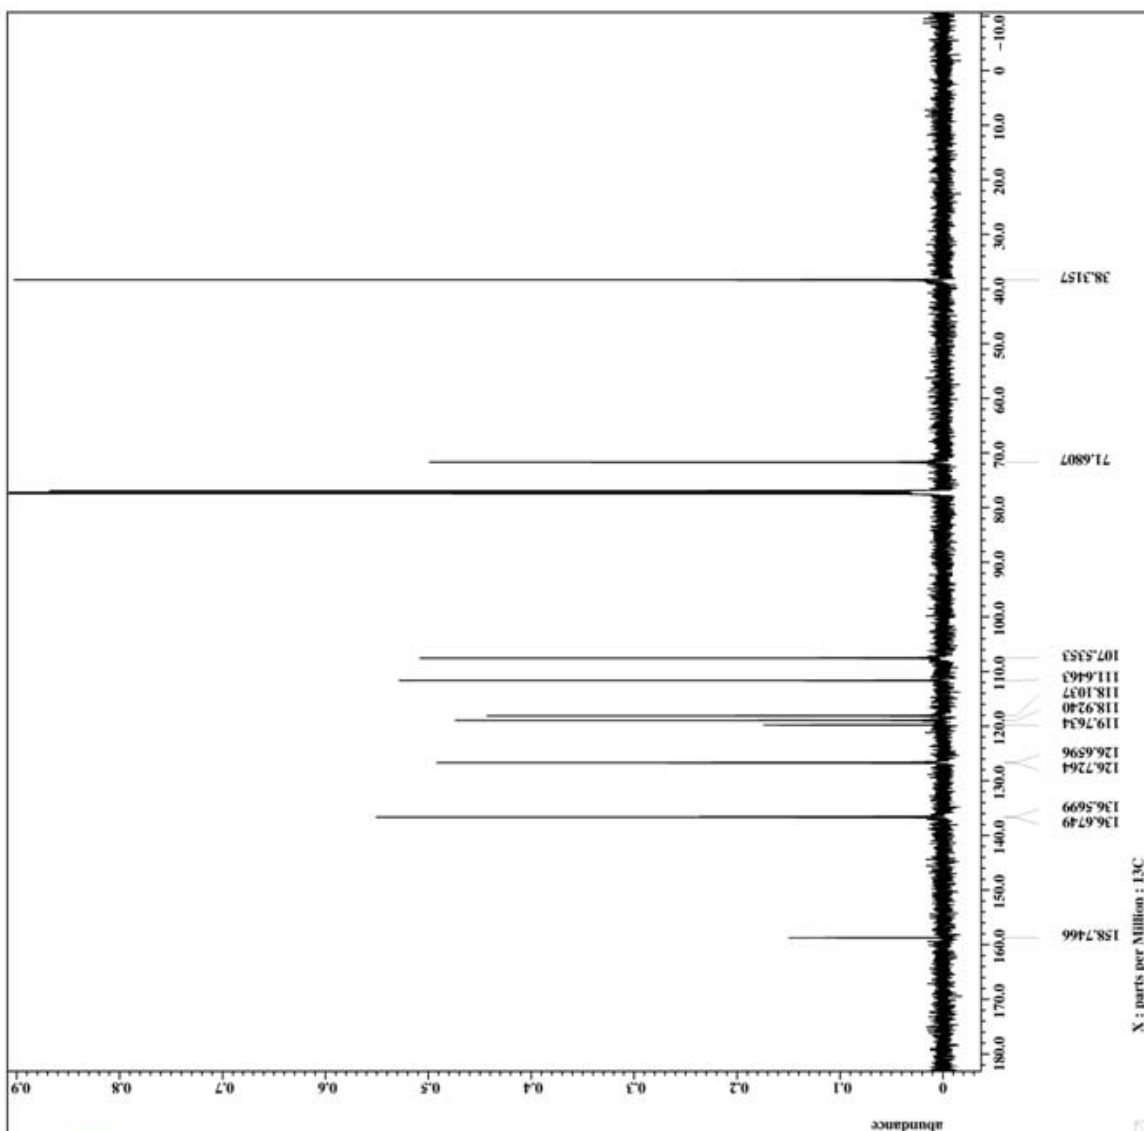

X : parts per Million : 13C

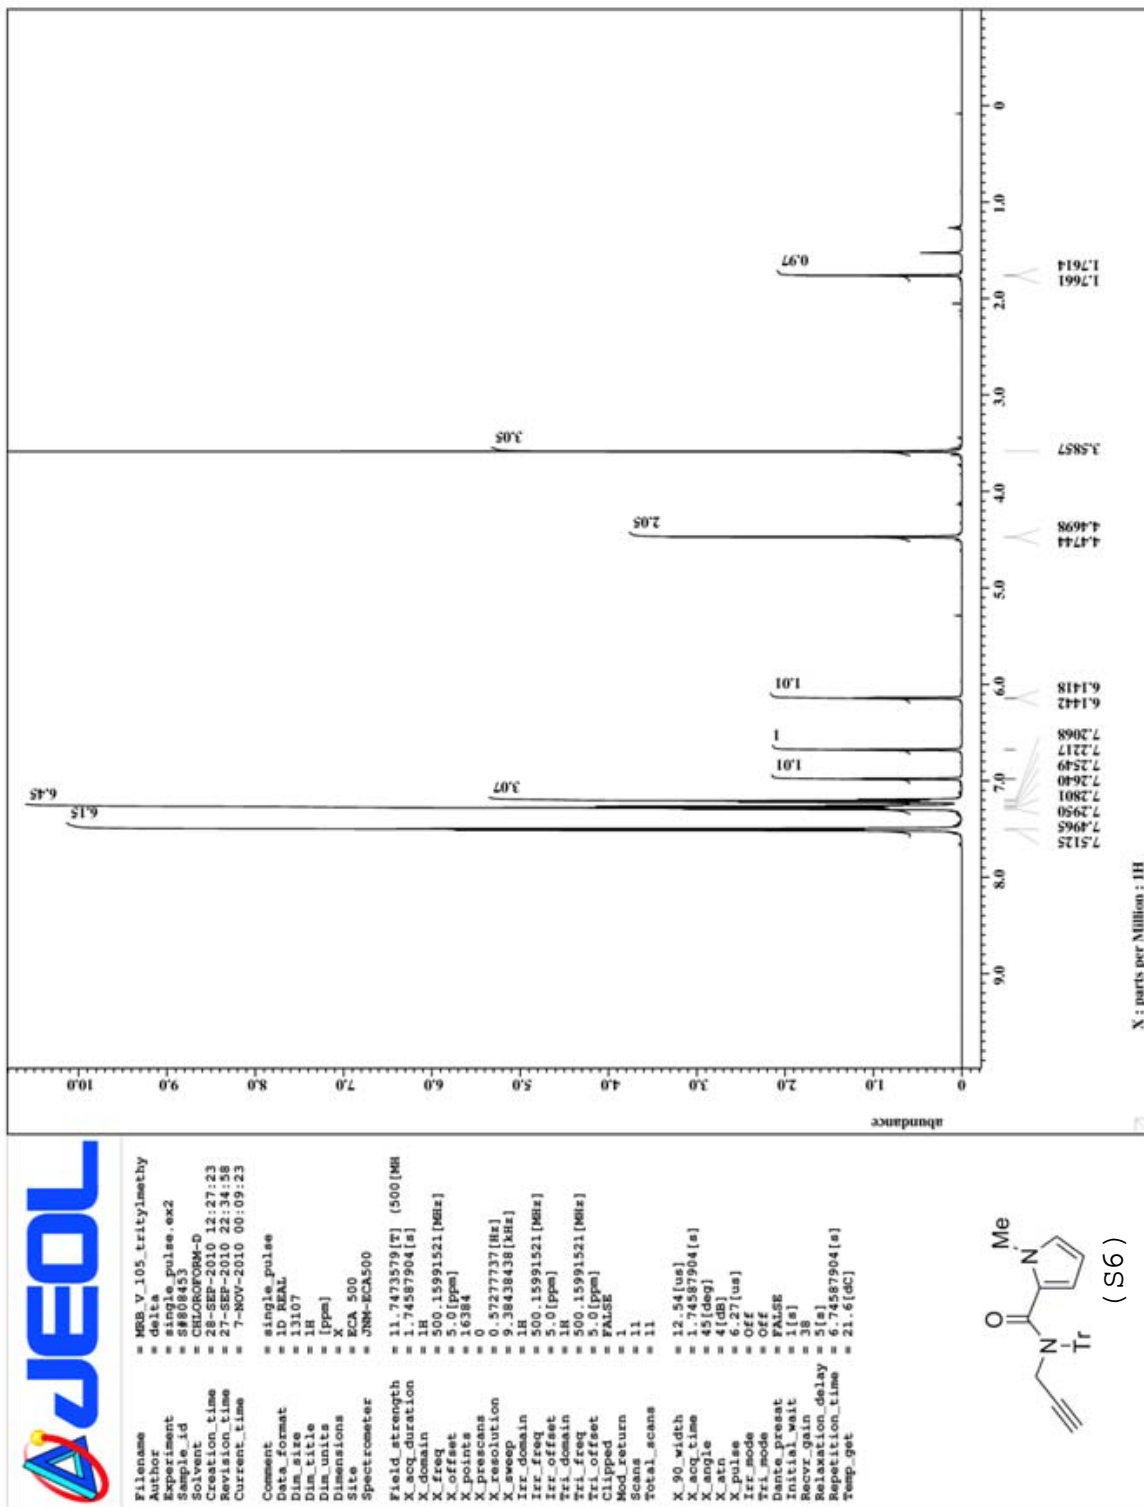



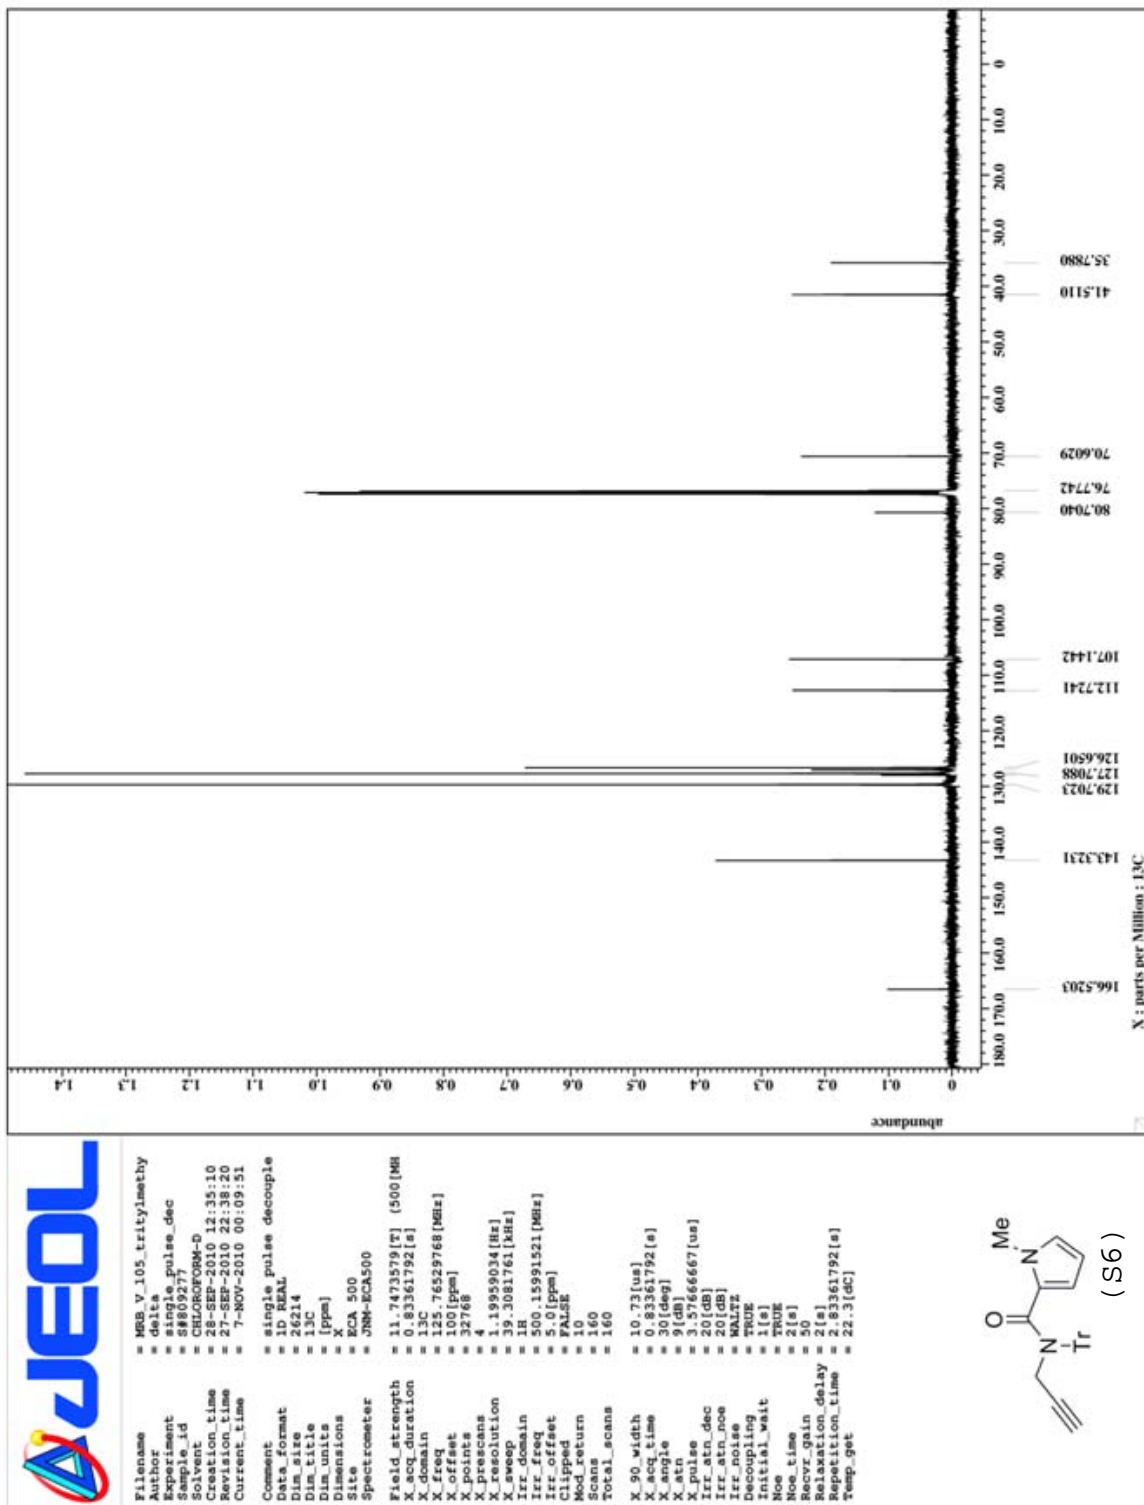



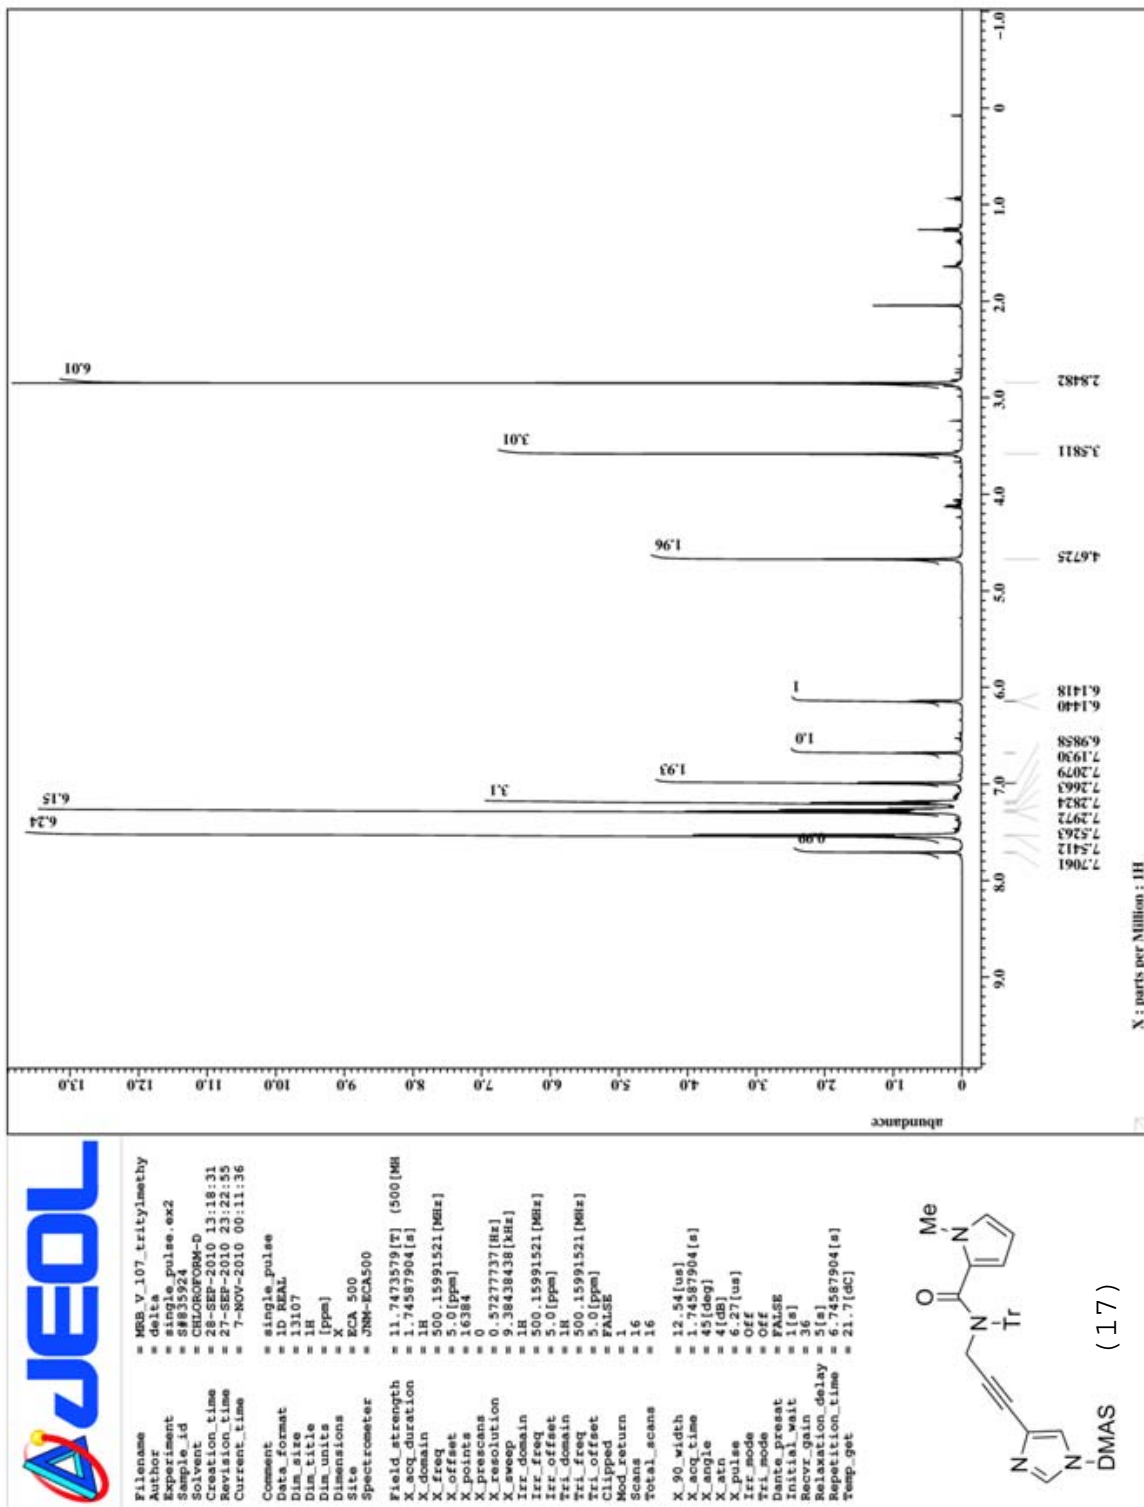

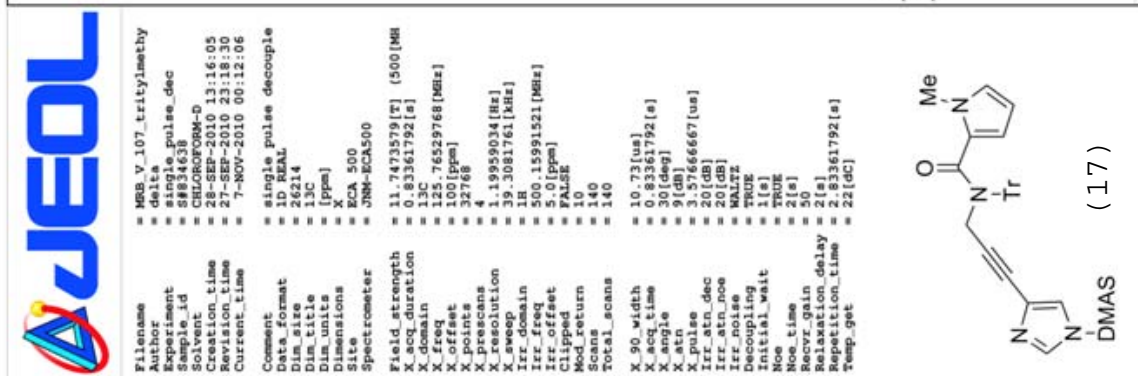



```

Filename = MSB_V_115_tritylmethy
Author = delta
Experiment = single_pulse.ex2
Sample_id = S8671165
Solvent = CHLOROFORM-D
Creation_time = 29-SEP-2010 08:39:08
Revision_time = 28-SEP-2010 18:45:17
Current_time = 7-NOV-2010 00:13:04

Comment = single_pulse
Data_format = 1D REAL
Dim_size = 13107
Dim_title = 1H
Dim_units = [ppm]
Dimensions = X
Site = XCA 500
Spectrometer = JNM-ECA500

Field_strength = 11.7473579[T] (500[MH]
X_acq_duration = 1.74587904[s]
X_domain = 1H
X_freq = 500.15991521[MHz]
X_offset = 5.0[ppm]
X_points = 16384
X_prescans = 0
X_resolution = 0.57277371[Hz]
X_sweep = 9.38438438[MHz]
X_domain = 1H
Irr_domain = 500.15991521[MHz]
Irr_freq = 5.0[ppm]
Irr_offset = 5.0[ppm]
Tri_domain = 1H
Tri_freq = 500.15991521[MHz]
Tri_offset = 5.0[ppm]
Clipped = FALSE
Mod_return = 1
Scans = 16
Total_scans = 16

X_90_width = 12.54[us]
X_acq_time = 1.74587904[s]
X_angle = 45[deg]
X_atn = 6[db]
X_pulse = 6[us]
X_pulse = 6[us]
Tri_mode = Off
Dante_presat = FALSE
Initial_wait = 1[s]
Recvr_gain = 36
Relaxation_delay = 5[s]
Repetition_time = 6.74587904[s]
Temp_get = 21.5[dc]
  
```

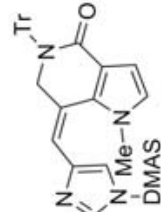

(18)

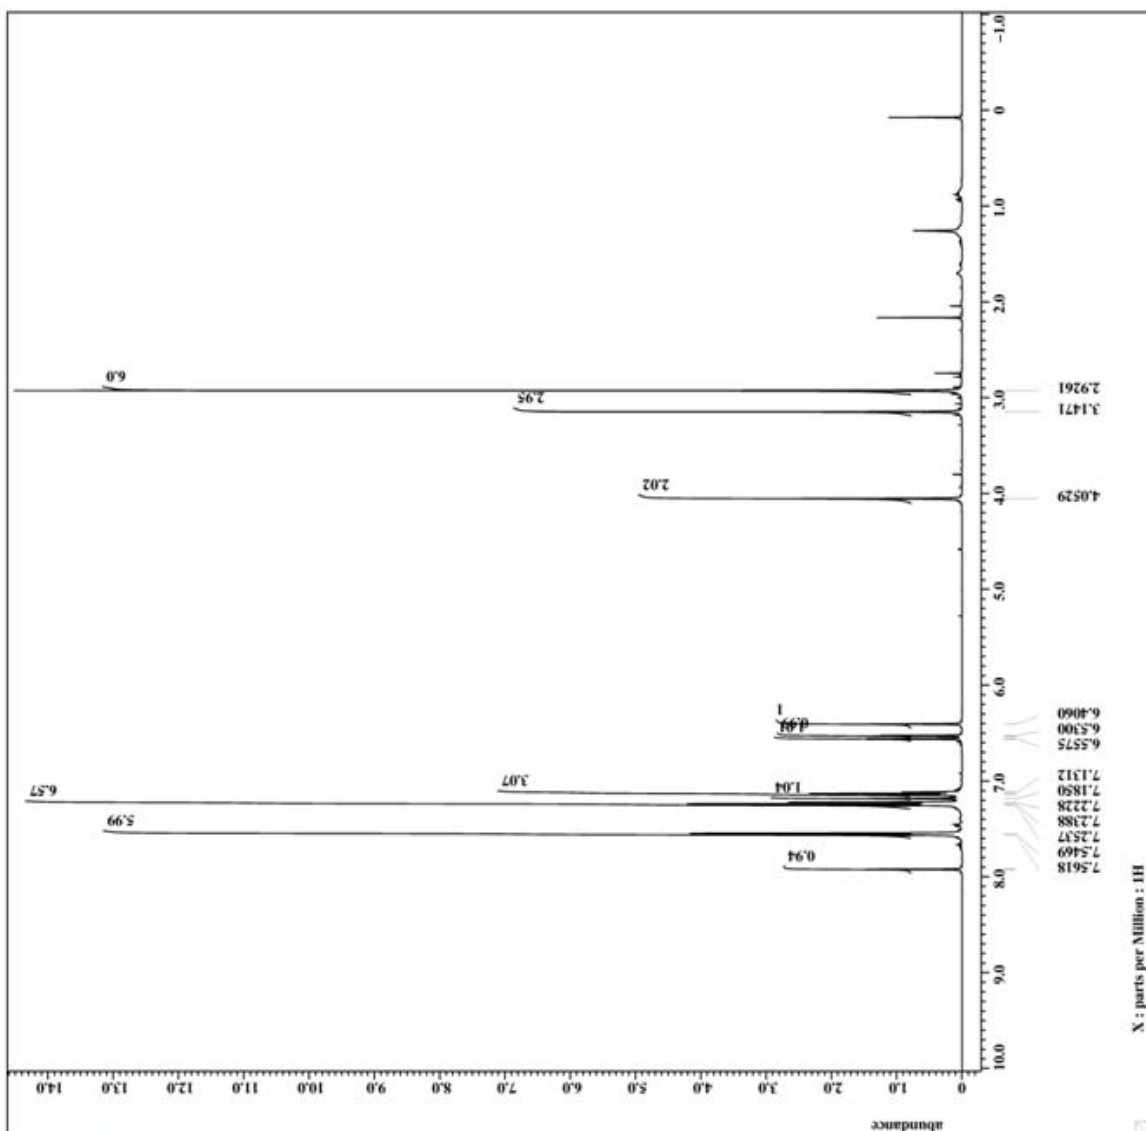

X : parts per Million : 1H



```

=====
Filename = MSB_V_115_tritylmethy
Author = delta
Experiment = single_pulse.ex2
Sample_id = S8671165
Solvent = CHLOROFORM-D
Creation_time = 28-SEP-2010 08:39:08
Revision_time = 28-SEP-2010 18:45:17
Current_time = 7-NOV-2010 00:13:55
=====
Comment = single_pulse
Data_format = 1D REAL
Dim_size = 13107
Dim_title = 1H
Dim_units = [ppm]
Dimensions = X 500
Site = QCA 500
Spectrometer = JNM-ECA500
=====
Field_strength = 11.7473579[T] (500[MH]
X_acq_duration = 1.74587904[s]
X_domain = 1H
X_freq = 500.15991521[MHz]
X_offset = 5.0[ppm]
X_points = 16384
X_prescans = 0
X_resolution = 0.5727737[HHz]
X_sweep = 9.38438438[kHz]
X_domain = 1H
Irr_domain = 500.15991521[MHz]
Irr_freq = 500.15991521[MHz]
Irr_offset = 5.0[ppm]
Tri_domain = 1H
Tri_freq = 500.15991521[MHz]
Tri_offset = 5.0[ppm]
Clipped = FALSE
Mod_return = 1
Scans = 16
Total_scans = 16
=====
X_90_width = 12.54[us]
X_acq_time = 1.74587904[s]
X_angle = 45[deg]
X_atn = 6[db]
X_pulse = 6[us]
X_pulse_off = 6[us]
Tri_mode = Off
Dante_preset = FALSE
Initial_wait = 1[s]
Recvr_gain = 36
Relaxation_delay = 5[s]
Repetition_time = 6.74587904[s]
Temp_get = 21.5[dc]
=====

```

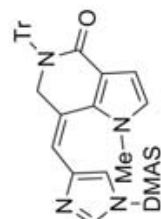

(18)

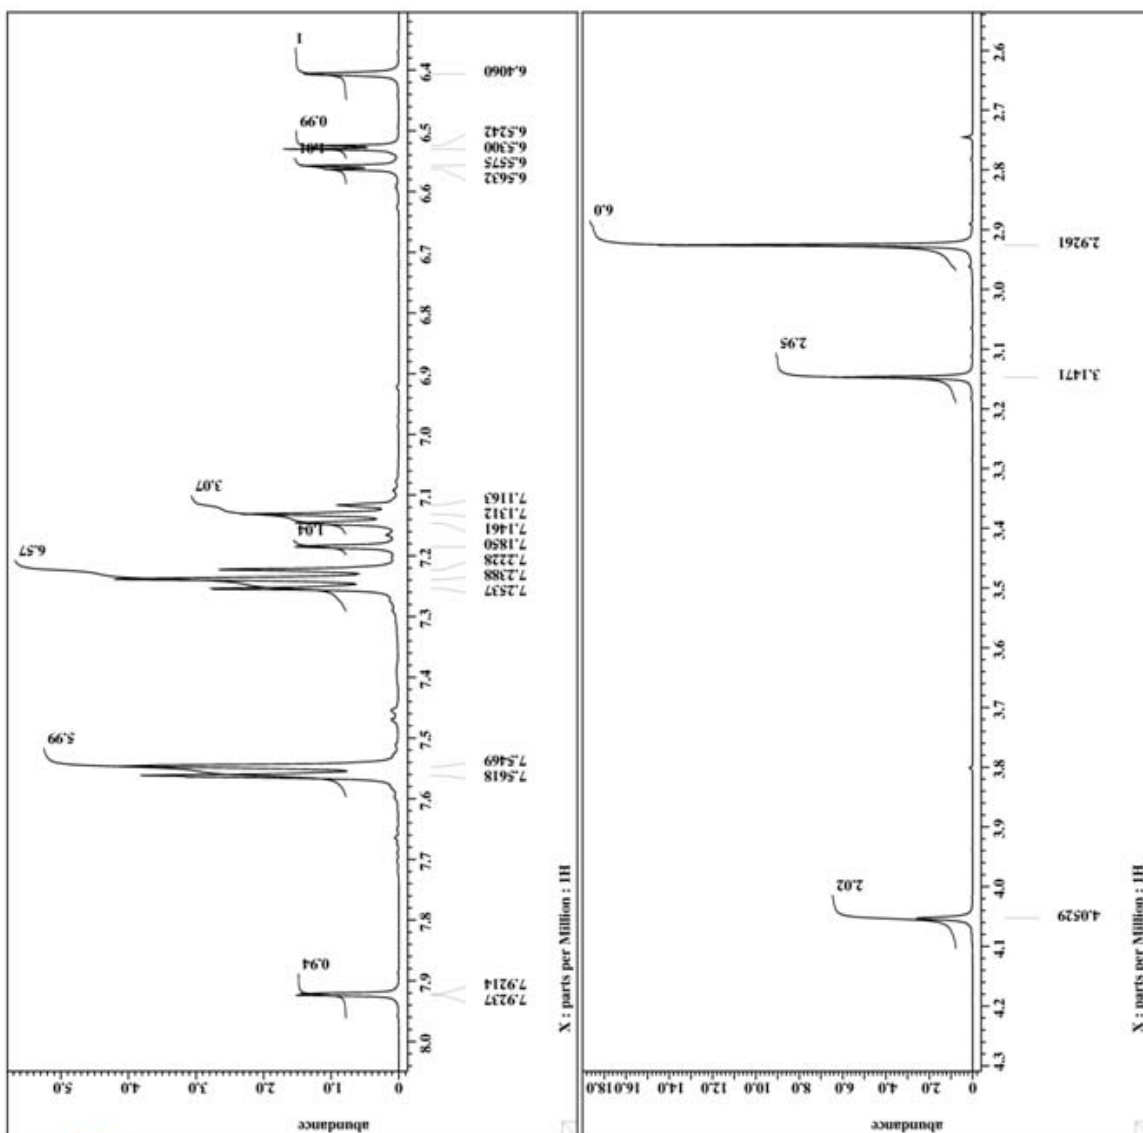

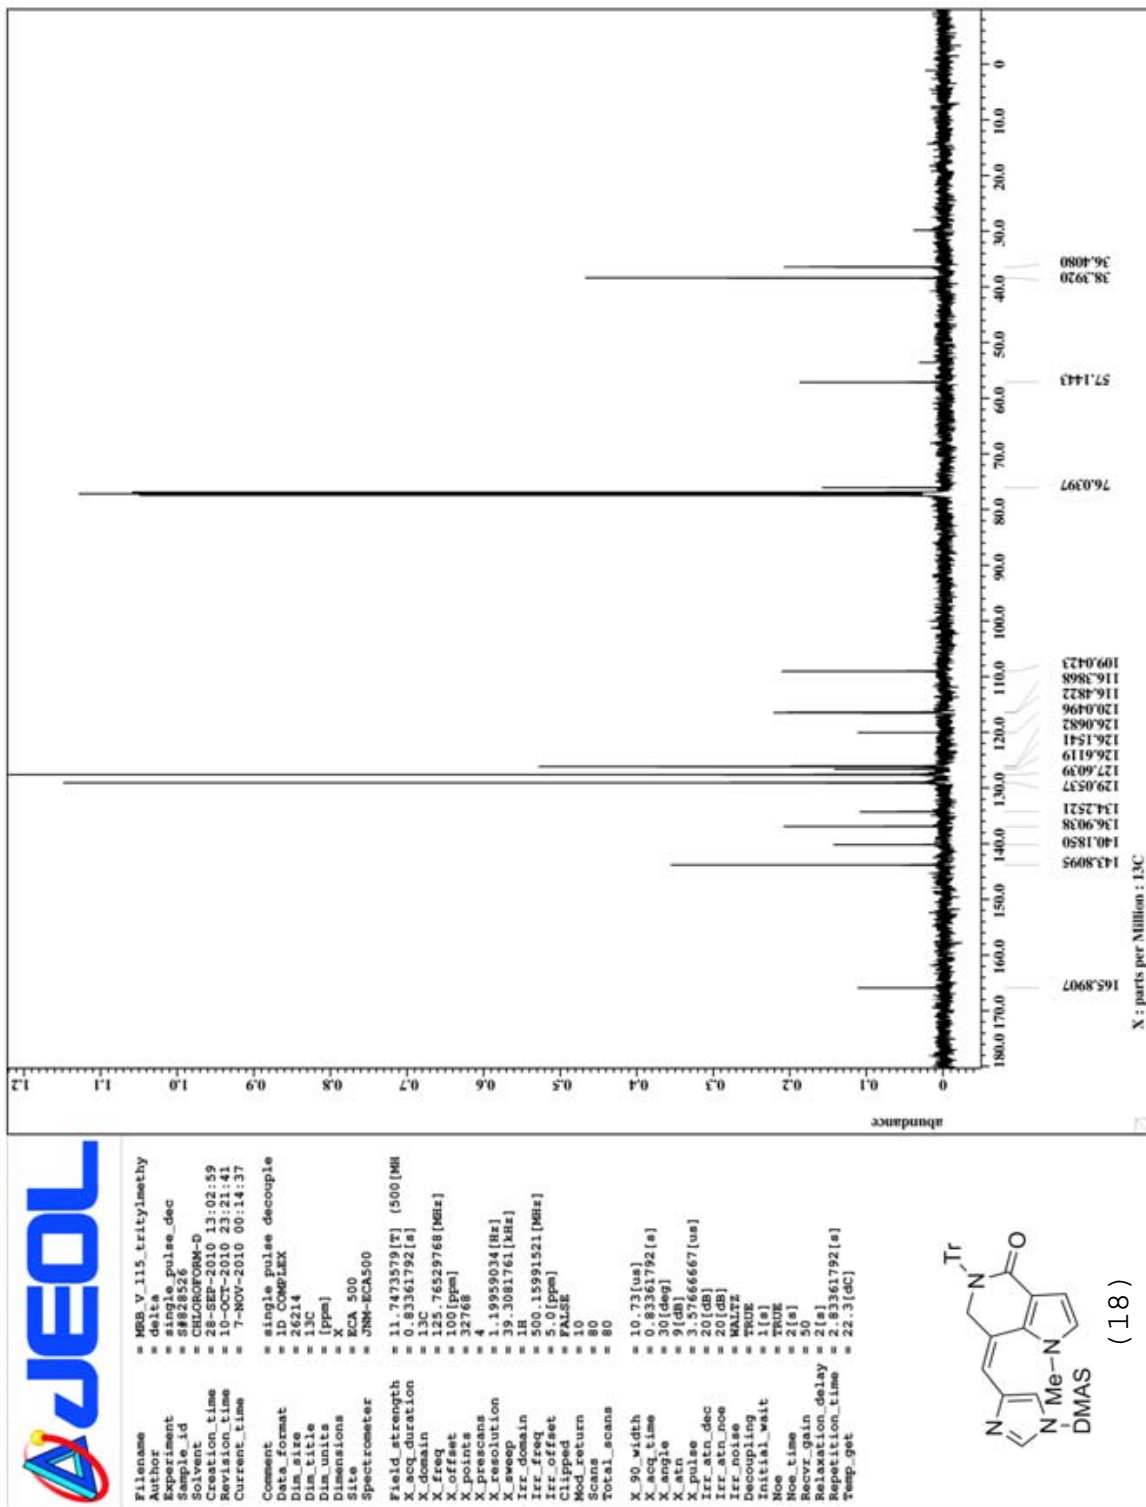

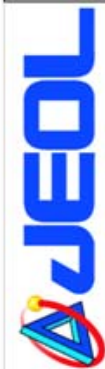

```

Filename = MRB_V_119A_methyltrit
Author = delta
Experiment = single_pulse.ex2
Sample_id = S875695
Solvent = CHLOROFORM-D
Creation_time = 16-OCT-2010 11:04:48
Revision_time = 7-NOV-2010 00:19:33
Current_time = 7-NOV-2010 00:17:13

Comment = single_pulse
Data_format = 1D REAL
Dia_size = 13107
Dia_title = 1H
Dia_units = [ppm]
Dimensions = FCA 500
Site = 500
Spectrometer = JNM-ECAS500

Field_strength = 11.7473579[T] (500[MH]
X_acq_duration = 1.74587904[s]
X_domain = 1H
X_freq = 500.15991521[MHz]
X_offset = 5.0[ppm]
X_points = 16384
X_resolution = 0.5727737[Hz]
X_sweep = 9.38438438[MHz]
Irr_domain = 1H
Irr_freq = 500.15991521[MHz]
Irr_offset = 5.0[ppm]
Tri_domain = 1H
Tri_freq = 500.15991521[MHz]
Tri_offset = 5.0[ppm]
Clip_offset = FALSE
Mod_return = 1
Scans = 16
Total_scans = 16

X_90_width = 12.54[us]
X_acq_time = 1.74587904[s]
X_angle = 45[deg]
X_coupl = 0[Hz]
X_pulse = 6.27[us]
Irr_mode = Off
Tri_mode = Off
Dante_preset = FALSE
Initial_wait = 1[s]
Recvr_gain = 42
Relaxation_delay = 5[s]
Repetition_time = 21.8[dc]
Temp_get =
  
```

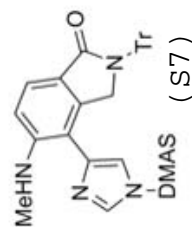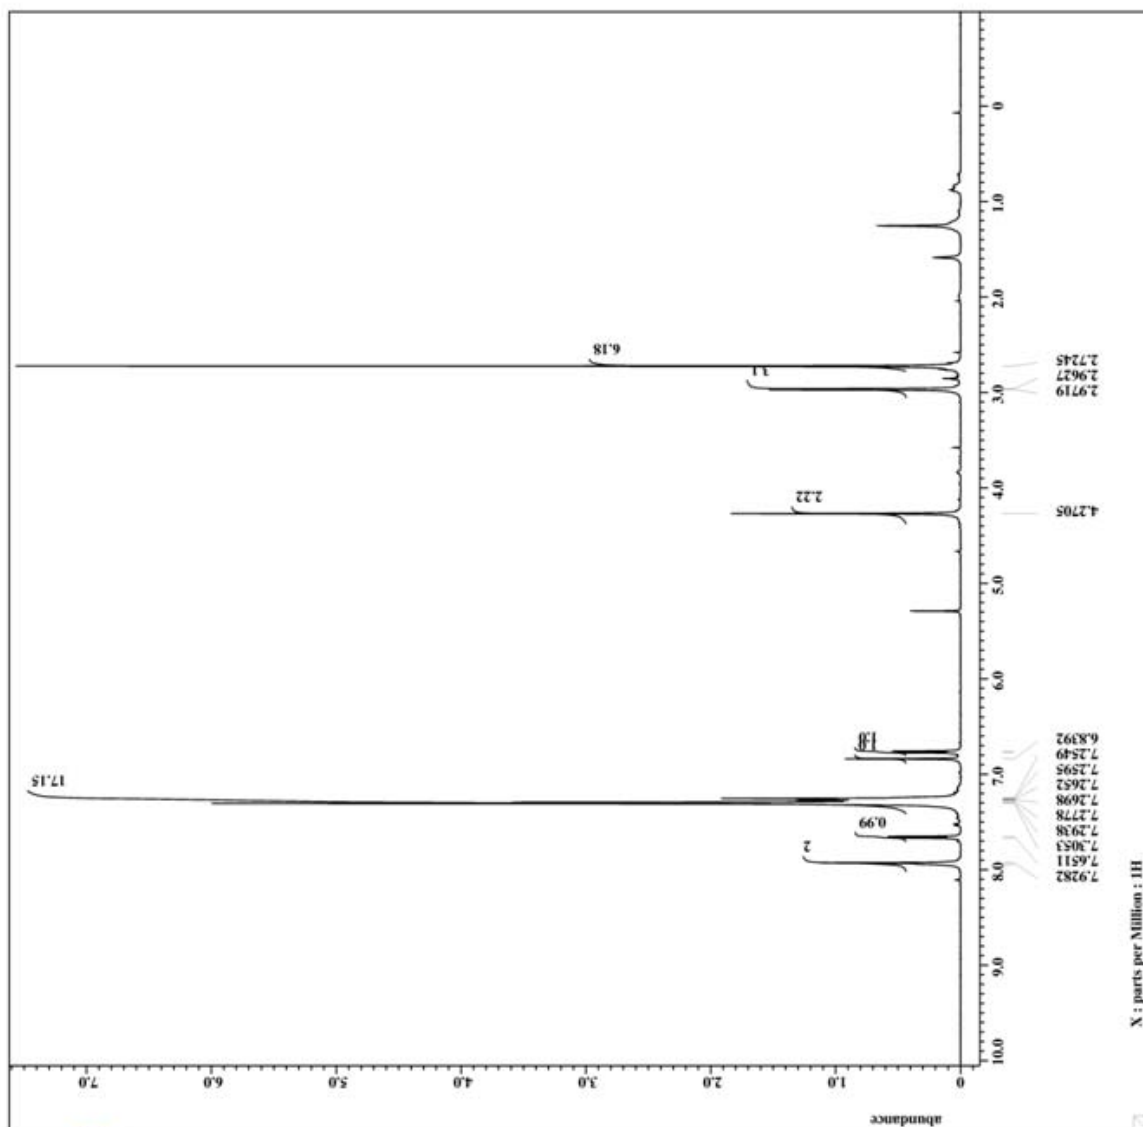



```

Filename = MRB_V_119A_methyltrit
Author = delta
Experiment = single_pulse_dec
Sample_id = S8760932
Solvent = CHLOROFORM-D
Creation_time = 16-OCT-2010 11:16:13
Revision_time = 17-OCT-2010 21:19:35
Current_time = 7-NOV-2010 00:17:49

Comment = single pulse decouple
Data_format = 1D REAL
Dia_size = 26214
Dia_title = 13C
Dia_units = [ppm]
Dimensions = XCA 500
Site = JNM-ECAS500
Spectrometer = JNM-ECAS500

Field_strength = 11.7473579[T] (500[MH]
X_acq_duration = 0.83361792[s]
X_domain = 13C
X_freq = 125.76529768[MHz]
X_offset = 100[ppm]
X_points = 32768
X_resolution = 4.19959034[Hz]
X_sweep = 39.3081761[MHz]
X_domain = 1H
Irr_freq = 500.15991521[MHz]
Irr_offset = 5.0[ppm]
Mod_return = FALSE
Sens = 10
Sens2 = 20
Total_scans = 220

X_90_width = 10.73[us]
X_acq_time = 0.83361792[s]
X_angle = 30[deg]
X_atn = 9[db]
X_pulse = 3.57666667[us]
Irr_atn_dec = 20[db]
Irr_atn_dec2 = 20[db]
Irr_polar = WALTZ
Decoupling = TRUE
Initial_wait = 1[s]
Noe = TRUE
Noe_time = 2[s]
Recvr_gain = 50
Relaxation_delay = 2[s]
Repetition_time = 2.83361792[s]
Temp_get = 22.2[degC]

```

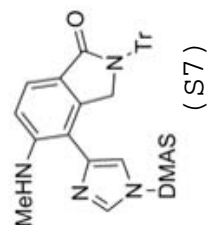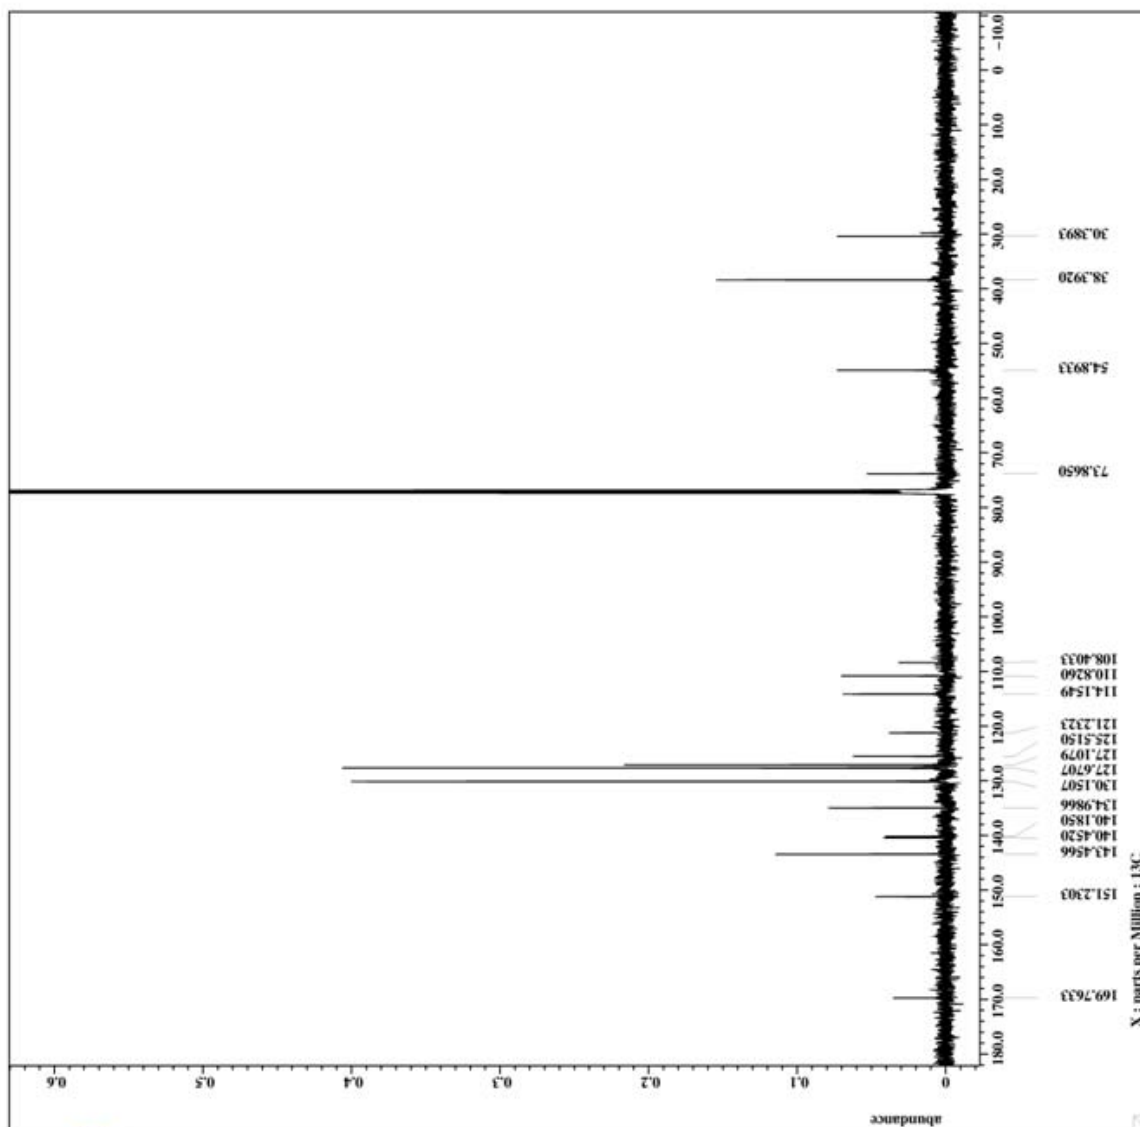



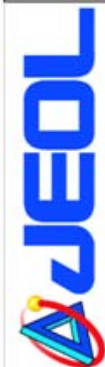

```

Filename = MRB_V_119B_GoldI_trit
Author = delta
Experiment = single_pulse.ex2
Sample_id = S8774232
Solvent = CHLOROFORM-D
Creation_time = 23-OCT-2010 11:28:04
Revision_time = 22-OCT-2010 21:38:31
Current_time = 7-NOV-2010 00:18:34

Comment = single_pulse
Data_format = 1D REAL
Dia_size = 13107
Dia_title = 1H
Dia_units = [ppm]
Dimensions = XCA 500
Site = ECA 500
Spectrometer = JNM-ECAS500

Field_strength = 11.7473579[T] (500[MH]
X_acq_duration = 1.74587904[s]
X_domain = 1H
X_freq = 500.15991521[MHz]
X_offset = 5.0[ppm]
X_points = 16384
X_resolution = 0.57277737[Hz]
X_sweep = 9.38438438[MHz]
Irr_domain = 1H
Irr_freq = 500.15991521[MHz]
Irr_offset = 5.0[ppm]
Tri_domain = 1H
Tri_freq = 500.15991521[MHz]
Tri_offset = 5.0[ppm]
Clip_level = FALSE
Mod_return = 1
Scans = 9
Total_scans = 9

X_90_width = 12.54[us]
X_acq_time = 1.74587904[s]
X_angle = 45[deg]
X_coupl = 0[Hz]
X_pulse = 6.27[us]
Irr_mode = Off
Tri_mode = Off
Dante_preset = FALSE
Initial_wait = 1[s]
Recvr_gain = 46
Relaxation_delay = 5[s]
Repetition_time = 2.1587904[s]
Temp_get = 25.2[degC]
  
```

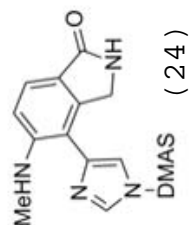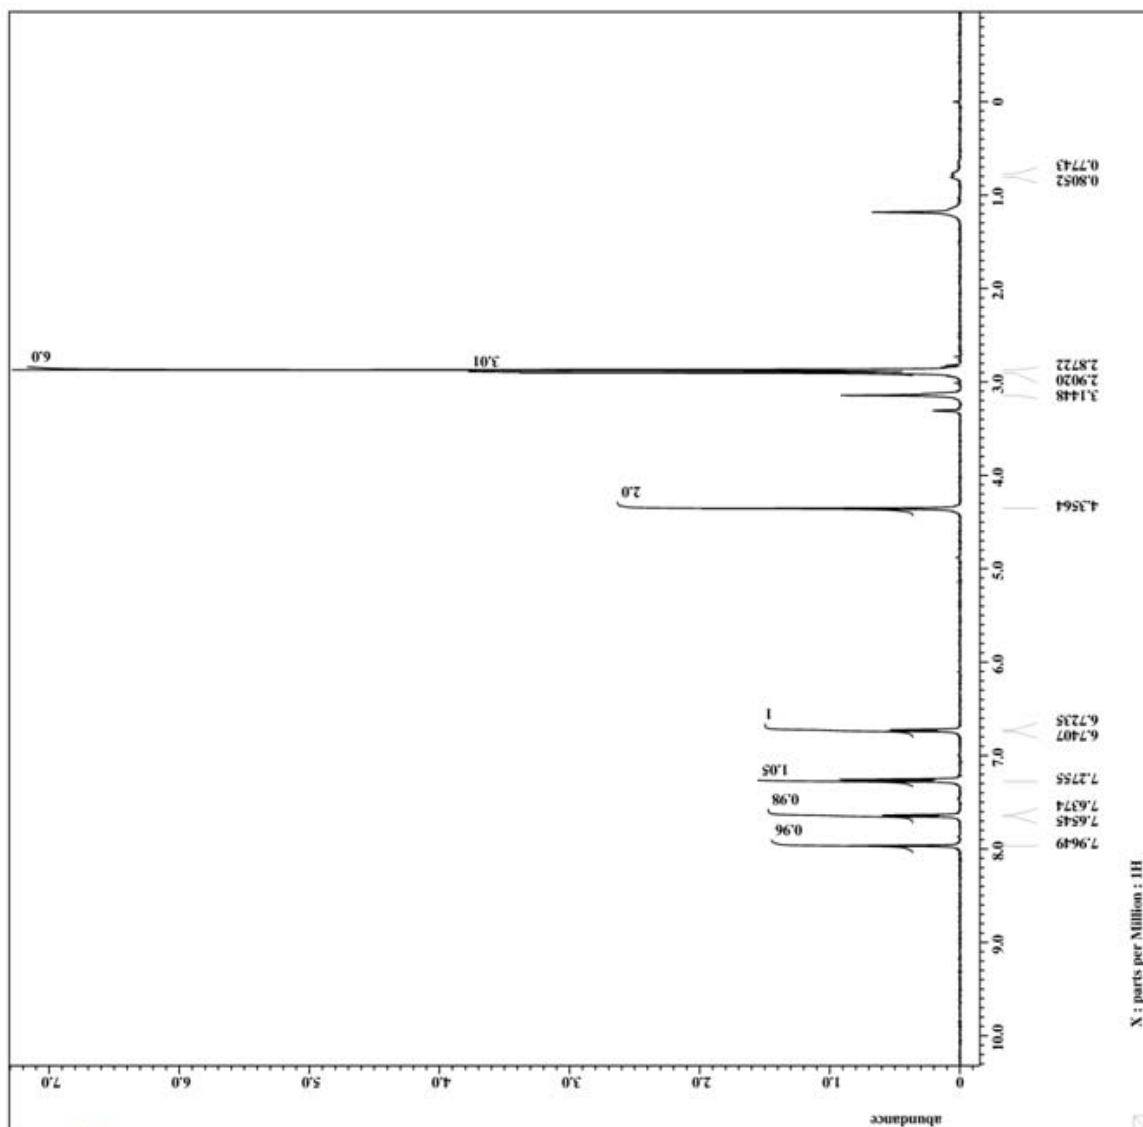





```

Filename = MRB_V_119B_GoldI_trit
Author = delta
Experiment = single_pulse_dec
Sample_id = S839262
Solvent = CHLOROFORM-D
Creation_time = 23-OCT-2010 01:42:58
Revision_time = 22-OCT-2010 11:19:38
Current_time = 7-NOV-2010 00:19:14

Comment = single pulse decouple
Data_format = 1D REAL
Dia_size = 26214
Dia_title = 13C
Dia_units = [ppm]
Dimensions = 2
Site = ECA 500
Spectrometer = JNM-ECAS500

Field_strength = 11.7473579[T] (500[MH]
X_acq_duration = 0.83361792[s]
X_domain = 13C
X_freq = 125.76529768[MHz]
X_offset = 100[ppm]
X_points = 32768
X_resolution = 4
X_sweep = 1.19959034[Hz]
X_domain = 1H
Irr_freq = 39.3081761[MHz]
Irr_domain = 1H
Irr_offset = 500.15991521[MHz]
Mod_return = FALSE
Sens = 10
Total_scans = 1000

X_90_width = 10.73[us]
X_acq_time = 0.83361792[s]
X_angle = 30[deg]
X_atn = 9[db]
X_pulse = 3.57666667[us]
Irr_atn_dec = 20[db]
Irr_atn_swe = 20[db]
Irr_polar = WALTZ
Decoupling = TRUE
Initial_wait = 1[s]
Noe = TRUE
Noe_time = 2[s]
Recvr_gain = 50
Relaxation_delay = 2[s]
Repetition_time = 2.83361792[s]
Temp_get = 25.7[degC]

```

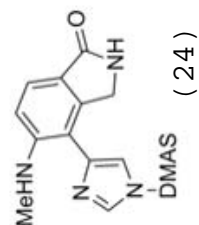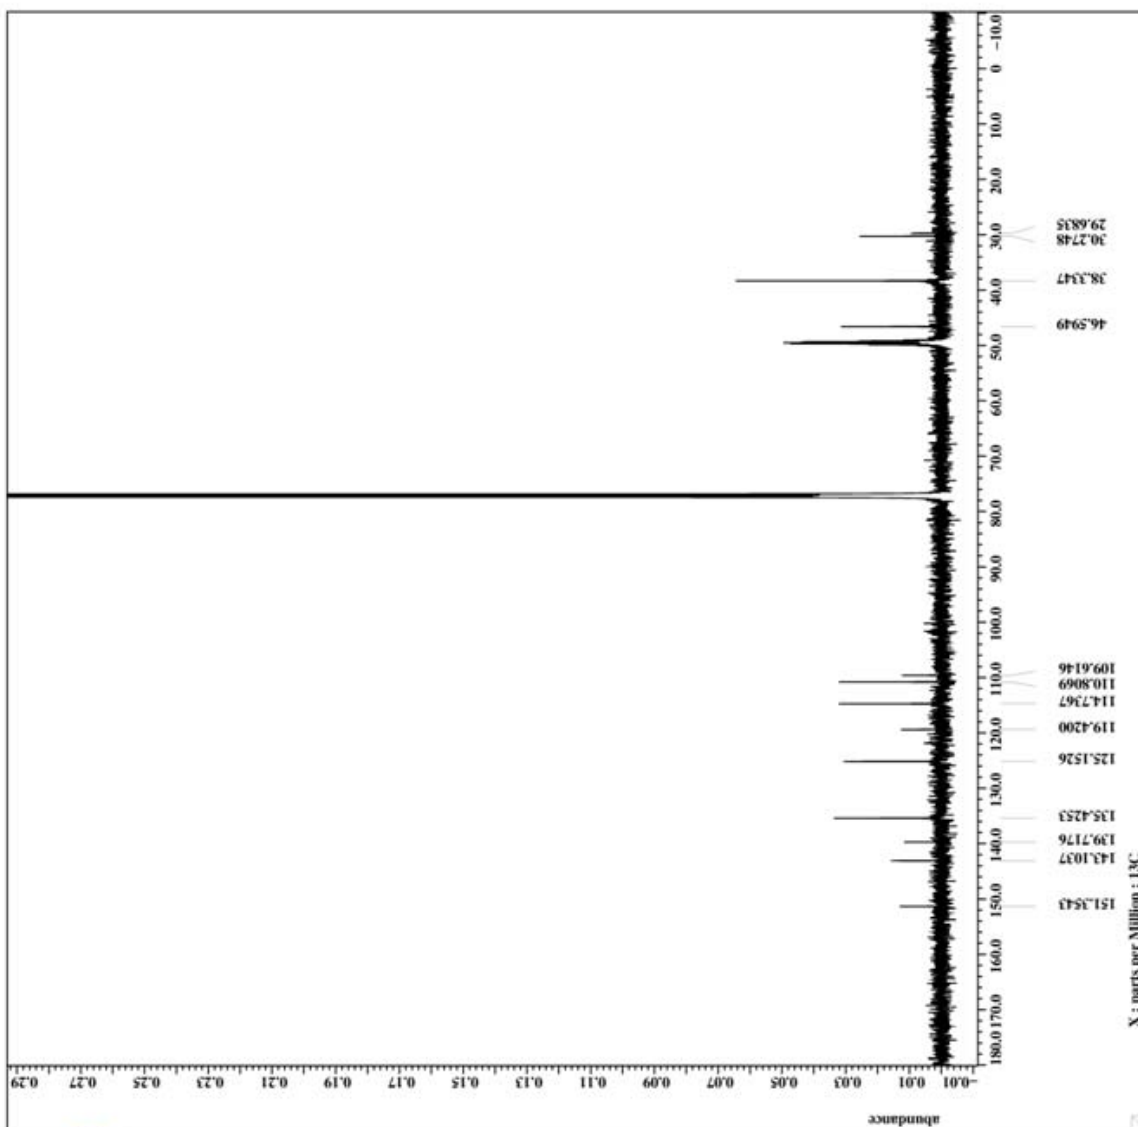



```

Filename = MSB_V_118_tritylmethy
Author = delta
Experiment = single_pulse.ex2
Sample_id = S8670713
Solvent = CHLOROFORM-D
Creation_time = 14-OCT-2010 08:34:46
Revision_time = 13-OCT-2010 18:44:03
Current_time = 7-NOV-2010 00:20:13

Comment = single_pulse
Data_format = 1D REAL
Dim_size = 13107
Dim_title = 1H
Dim_units = [ppm]
Dimensions = X
Site = XCA 500
Spectrometer = JNM-ECA500

Field_strength = 11.7473579[T] (500[MH]
X_acq_duration = 1.74587904[s]
X_domain = 1H
X_freq = 500.15991521[MHz]
X_offset = 5.0[ppm]
X_points = 16384
X_prescans = 0
X_resolution = 0.5727737[HHz]
X_sweep = 9.38438438[kHz]
X_domain = 1H
Irr_domain = 500.15991521[MHz]
Irr_freq = 5.0[ppm]
Irr_offset = 5.0[ppm]
Tri_domain = 1H
Tri_freq = 500.15991521[MHz]
Tri_offset = 5.0[ppm]
Clipped = FALSE
Mod_return = 1
Scans = 16
Total_scans = 16

X_90_width = 12.54[us]
X_acq_time = 1.74587904[s]
X_angle = 45[deg]
X_atn = 6[us]
X_pulse = 6[us]
X_pulse_offset = 6[us]
Tri_mode = Off
Dante_presat = FALSE
Initial_wait = 1[s]
Recvr_gain = 46
Relaxation_delay = 5[s]
Repetition_time = 6.74587904[s]
Temp_get = 21.7[degC]

```

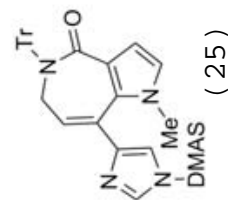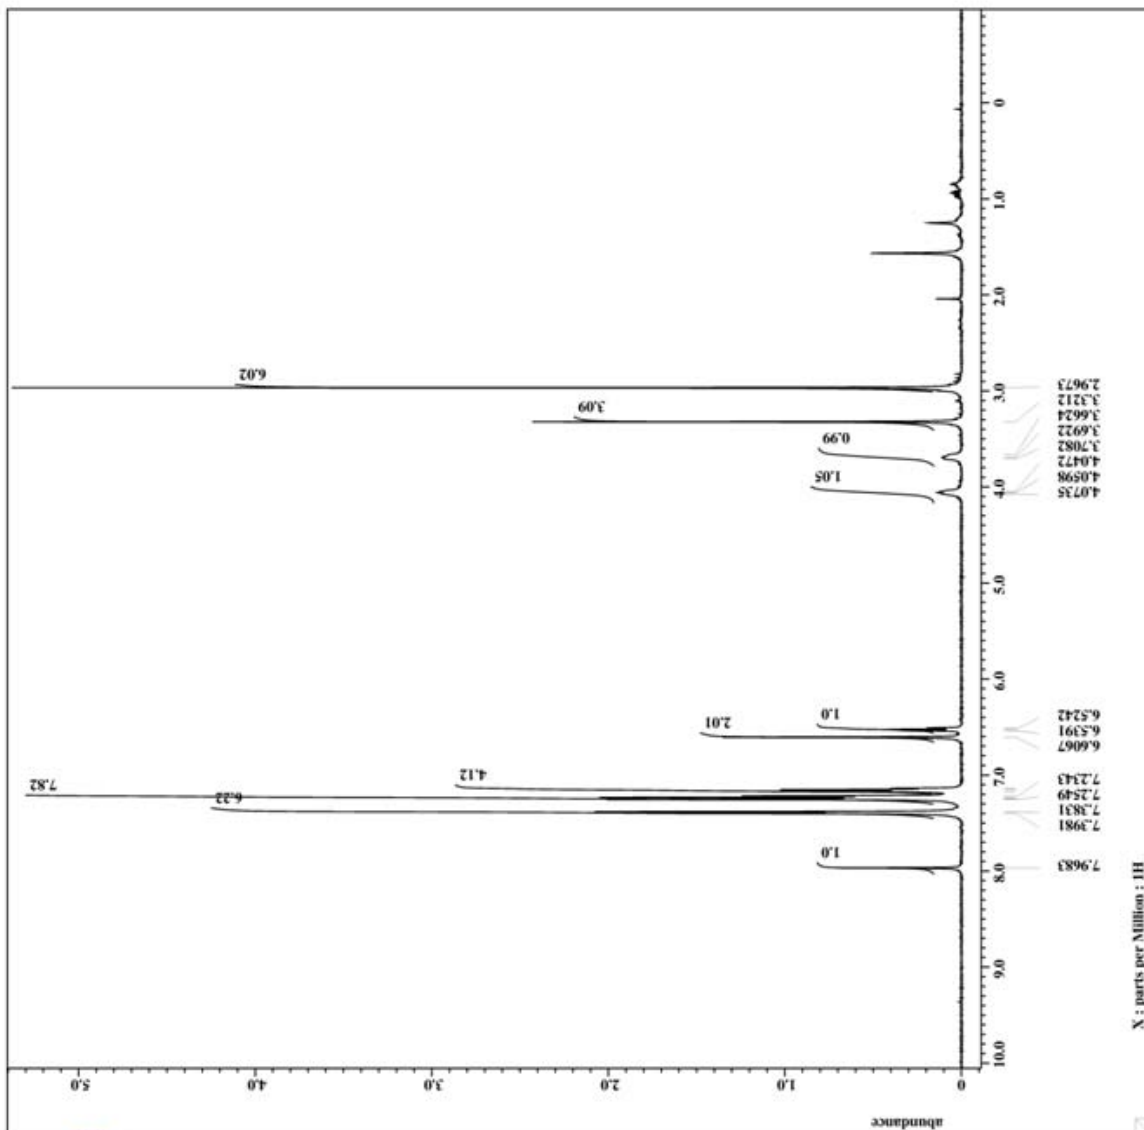



```

=====
Filename      = MSB_V_118_tritylmethy
Author        = delta
Experiment    = single_pulse_dec
Sample_id     = S863707
Solvent       = CHLOROFORM-D
Creation_time = 14-OCT-2010 08:12:30
Revision_time = 13-OCT-2010 18:19:07
Current_time  = 7-NOV-2010 00:20:38
=====
Comment       = single pulse decouple
Data_format   = 1D REAL
Dir_size      = 26214
Dir_title     = 13C
Dir_units     = [ppm]
Dimensions    = X
Site          = XCA 500
Spectrometer  = JNM-ECA500
=====
Field_strength = 11.7473579[T] (500[MH
X_acq_duration = 0.83361792[s]
X_domain       = 13C
X_freq         = 125.76529768[MHz]
X_offset       = 100[ppm]
X_points       = 32768
X_prescans     = 4
X_resolution   = 1.19959034[Hz]
X_sweep        = 39.3081761[MHz]
X_domain       = 1H
Irr_domain     = 1H
Irr_freq       = 500.15991521[MHz]
Irr_offset     = 5.0[ppm]
Clipped        = FALSE
Mod_return     = 10
Scans          = 160
Total_scans    = 160
=====
X_90_width    = 10.73[us]
X_acq_time     = 0.83361792[s]
X_angle        = 30[deg]
X_atn          = 9[db]
X_pulse        = 3.57666667[us]
Irr_atn_dec    = 20[db]
Irr_atn_noe    = 30[db]
Irr_atn_noe    = 30[db]
Decoupling     = TRUE
Initial_wait   = 1[s]
Noe_time       = TRUE
Noe_time       = 2[s]
Recvr_gain     = 50
Relaxation_delay = 2[s]
Repetition_time = 2.83361792[s]
Temp_get       = 22.1[dc]
=====

```

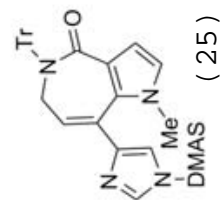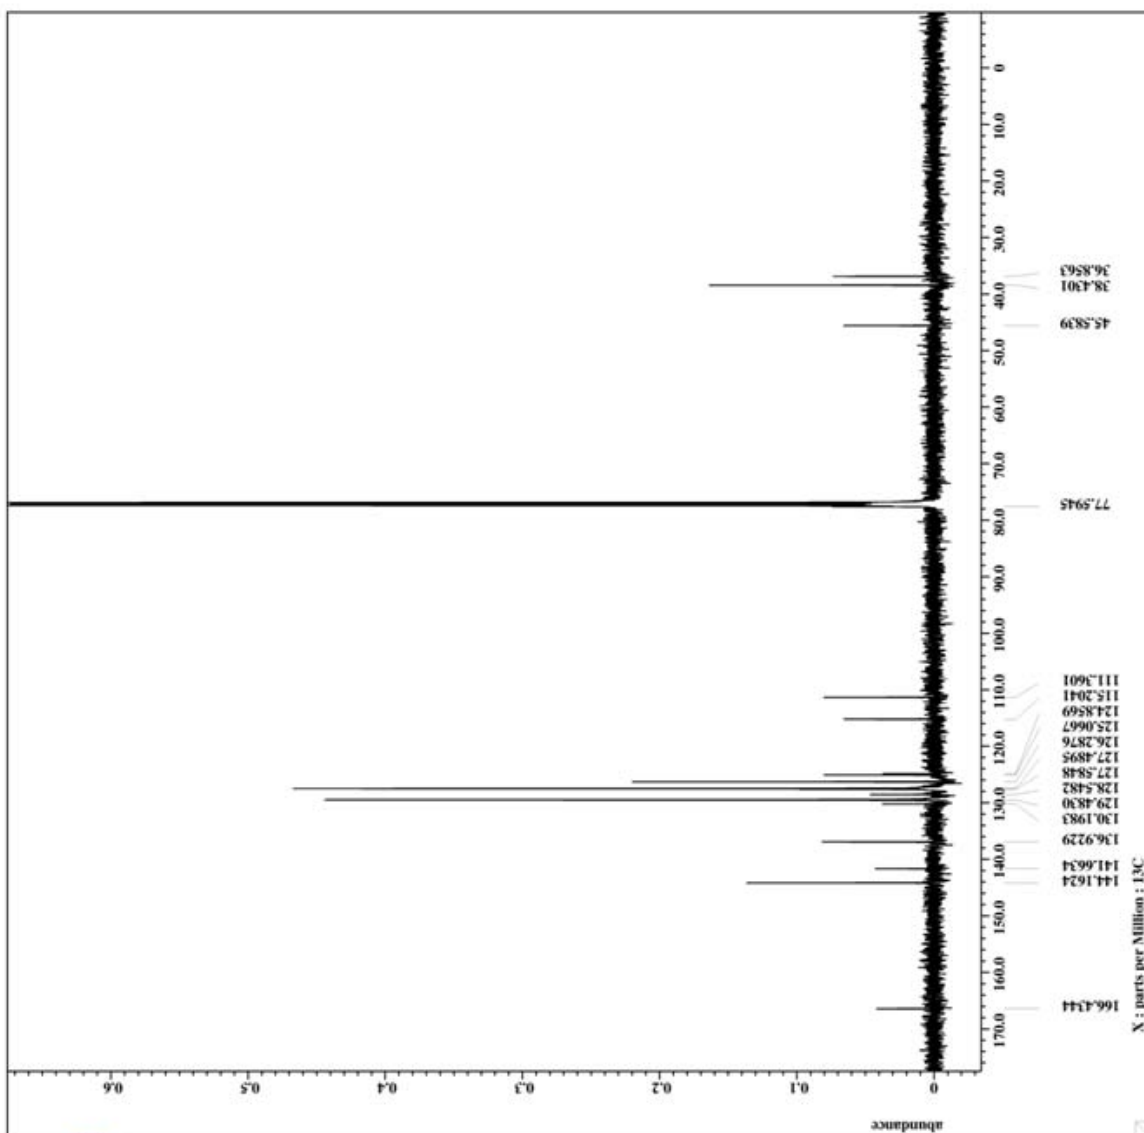

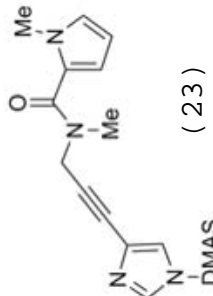

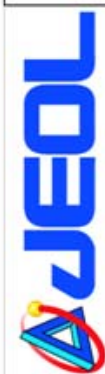

```

=====
Filename = MSB_V_7_methylmethyl_
Author = delta
Experiment = single_pulse_dec
Sample_id = S8818369
Solvent = CHLOROFORM-D
Creation_time = 28-SEP-2010 12:51:02
Revision_time = 10-OCT-2010 23:27:25
Current_time = 7-NOV-2010 00:22:08
=====
Comment = single pulse decouple
Data_format = 1D COMPLEX
Dim_size = 26214
Dim_title = 13C
Dim_units = [ppm]
Dimensions = X
Site = XCA 500
Spectrometer = JNM-ECA500
=====
Field_strength = 11.7473579[T] (500[MH
X_acq_duration = 0.83361792[s]
X_domain = 13C
X_freq = 125.76529768[MHz]
X_offset = 100[ppm]
X_points = 32768
X_prescans = 1
X_resolution = 1.19959034[Hz]
X_sweep = 39.3081761[kHz]
X_domain = 1H
Irr_domain = 1H
Irr_freq = 500.15991521[MHz]
Irr_offset = 5.0[ppm]
Clipped = FALSE
Mod_return = 10
Scans = 160
Total_scans = 160
=====
X_90_width = 10.73[us]
X_acq_time = 0.83361792[s]
X_angle = 30[deg]
X_atn = 9[db]
X_atn = 3.57666667[us]
X_pulse = 20[db]
Irr_atn_dec = 20[db]
Irr_atn_noe = 20[db]
Irr_atn_noe = 20[db]
Decoupling = TRUE
Initial_wait = 1[s]
Noe_time = TRUE
Noe_time = 2[s]
Recvr_gain = 50
Relaxation_delay = 2[s]
Repetition_time = 2.83361792[s]
Temp_get = 22.5[dc]
=====

```

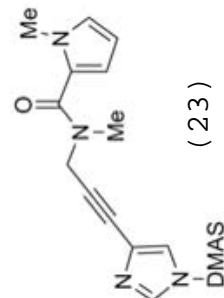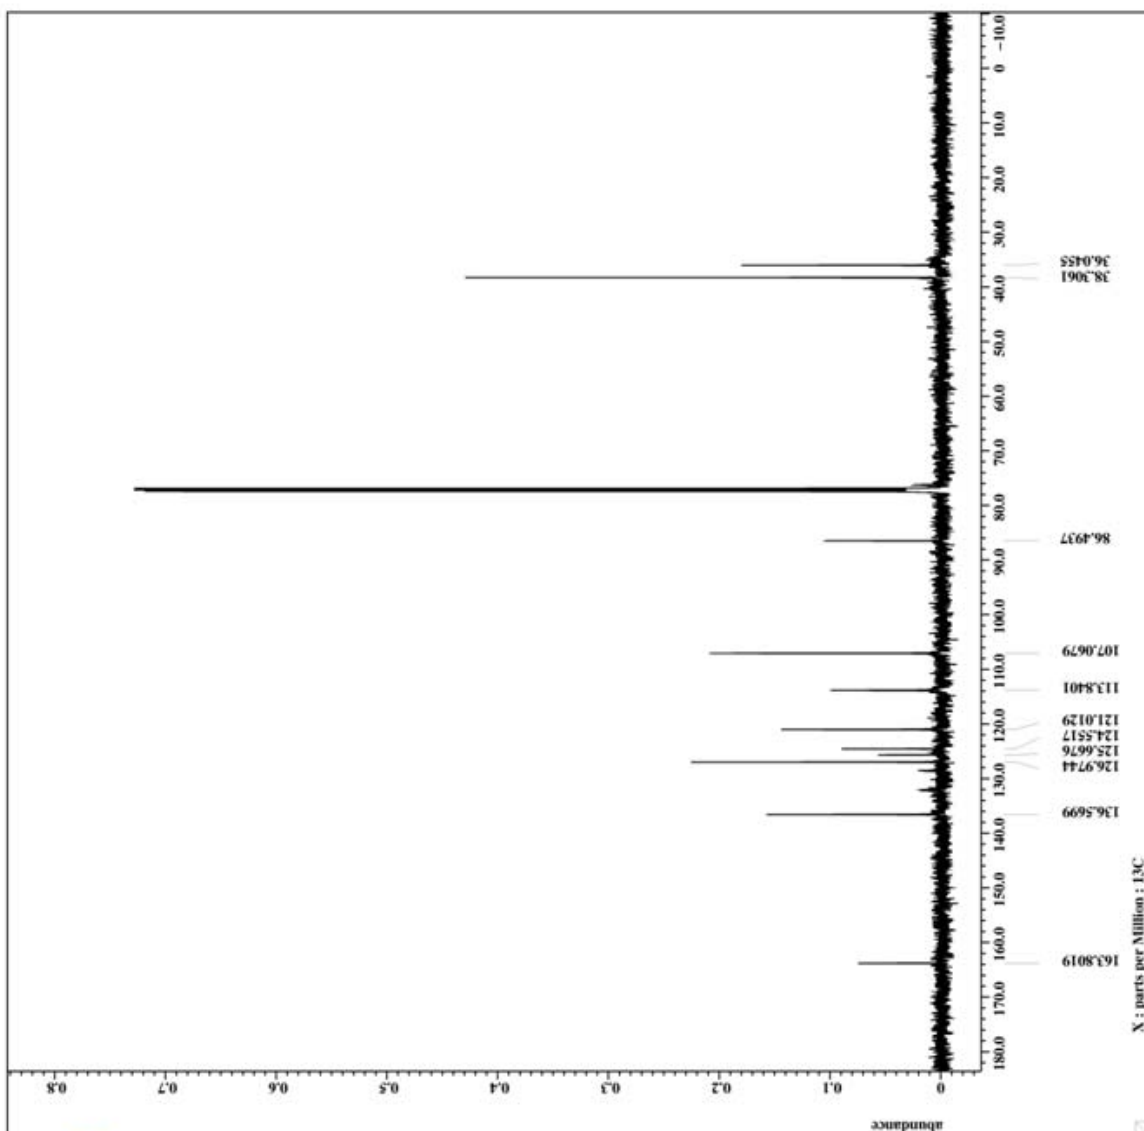

```

= MBS_V_106_methylmethy
delta
= single_pulse.es2
= S4473281
= CHLOROFORM-D
4-OCT-2010 03:05:52
= 3-OCT-2010 13:15:50
= 7-NOV-2010 00:24:59
= single_pulse
= 1D REAL
= 1H
= 1H
= [ppm]
= x
= ECA 500
= JNN-ECA500
= 11.7473579[T] (500[MH
= 1.74587904[s]
= 1H
= 500.15991521[MHz]
= 5.0[ppm]
= 16384
= 0
= 0.52277737[Hz]
= 9.38438438[kHz]
= 500.15991521[MHz]
= 5.0[ppm]
= 1H
= 1H
= 500.15991521[MHz]
= 5.0[ppm]
= FALSE
= 1
= 16
= 16
= 12.54[us]
= 1.74587904[s]
= 45[deg]
= 4[db]
= 6.27[us]
= Off
= Off
= Off
= False
= 1H
= 46
= 5[s]
= 6.74587904[s]
= 21.8[c]

```

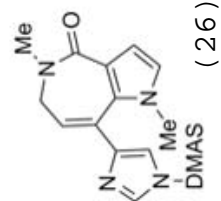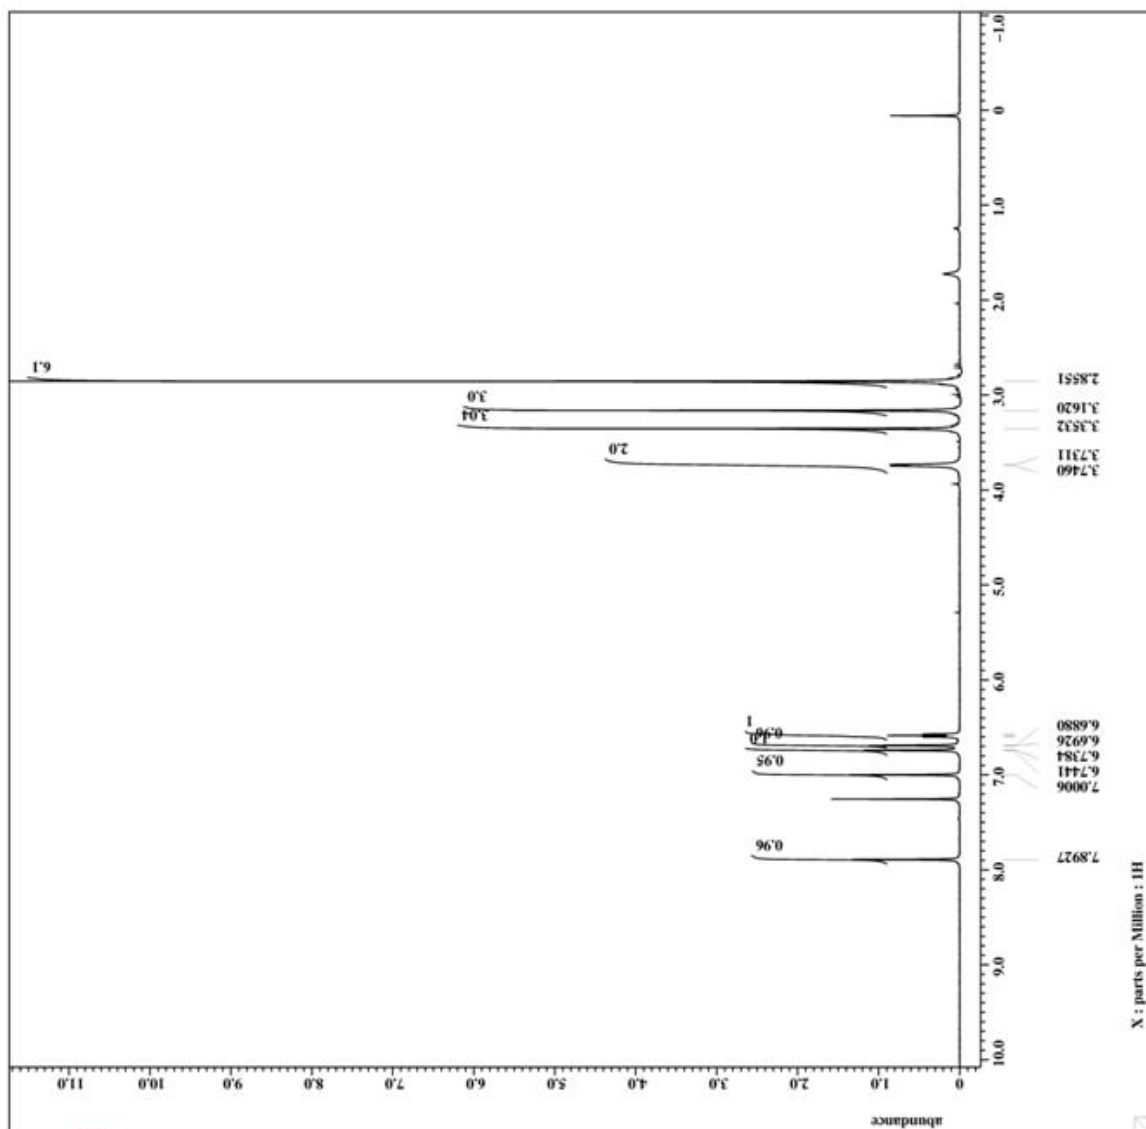

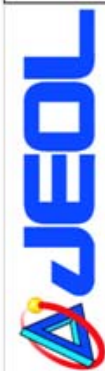

```

Filename = MRB_V_106_methylmethy
Author = delta
Experiment = single_pulse_dec
Sample_id = S868209
Solvent = CHLOROFORM-D
Creation_time = 30-SEP-2010 09:05:06
Revision_time = 29-SEP-2010 15:07:20
Current_time = 7-NOV-2010 00:23:36
Comment = single pulse decouple
Data_format = 1D REAL
Data_size = 26214
Din_size = 13C
Din_title = [ppm]
Din_units = [ppm]
Dimensions = 2D 500
Site = KCA 500
Spectrometer = JNM-ECA500
Field_strength = 11.7473579[T] (500[MH
X.acq_duration = 0.83361792[s]
X.domain = 13C
X.freq = 125.76529768[MHz]
X.offset = 100[ppm]
X.points = 32768
X.resolution = 4
X.sweep = 1.19959034[Hz]
X.domain = 1H
X.irr_domain = 1H
X.irr_freq = 500.15991521[MHz]
X.irr_offset = 5.0[ppm]
X.clipped = FALSE
Mod_return = 10
Scans = 10
Total_scans = 100
X.g0_width = 10.73[us]
X.acq_time = 0.83361792[s]
X.angle = 30[deg]
X.atn = 9[db]
X.pulse = 3.57666667[us]
X.irr_atn_dec = 20[db]
X.irr_atn_noe = 20[db]
X.irr_polase = TRUE
Decoupling = TRUE
Initial_wait = 1[s]
Noe = TRUE
Noe_time = 2[s]
Recvr_gain = 50
Relaxation_delay = 2[s]
Repetition_time = 0.83361792[s]
Temp_get = 22.3[deg]

```

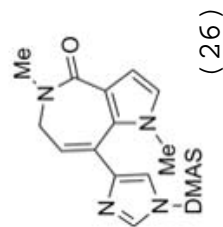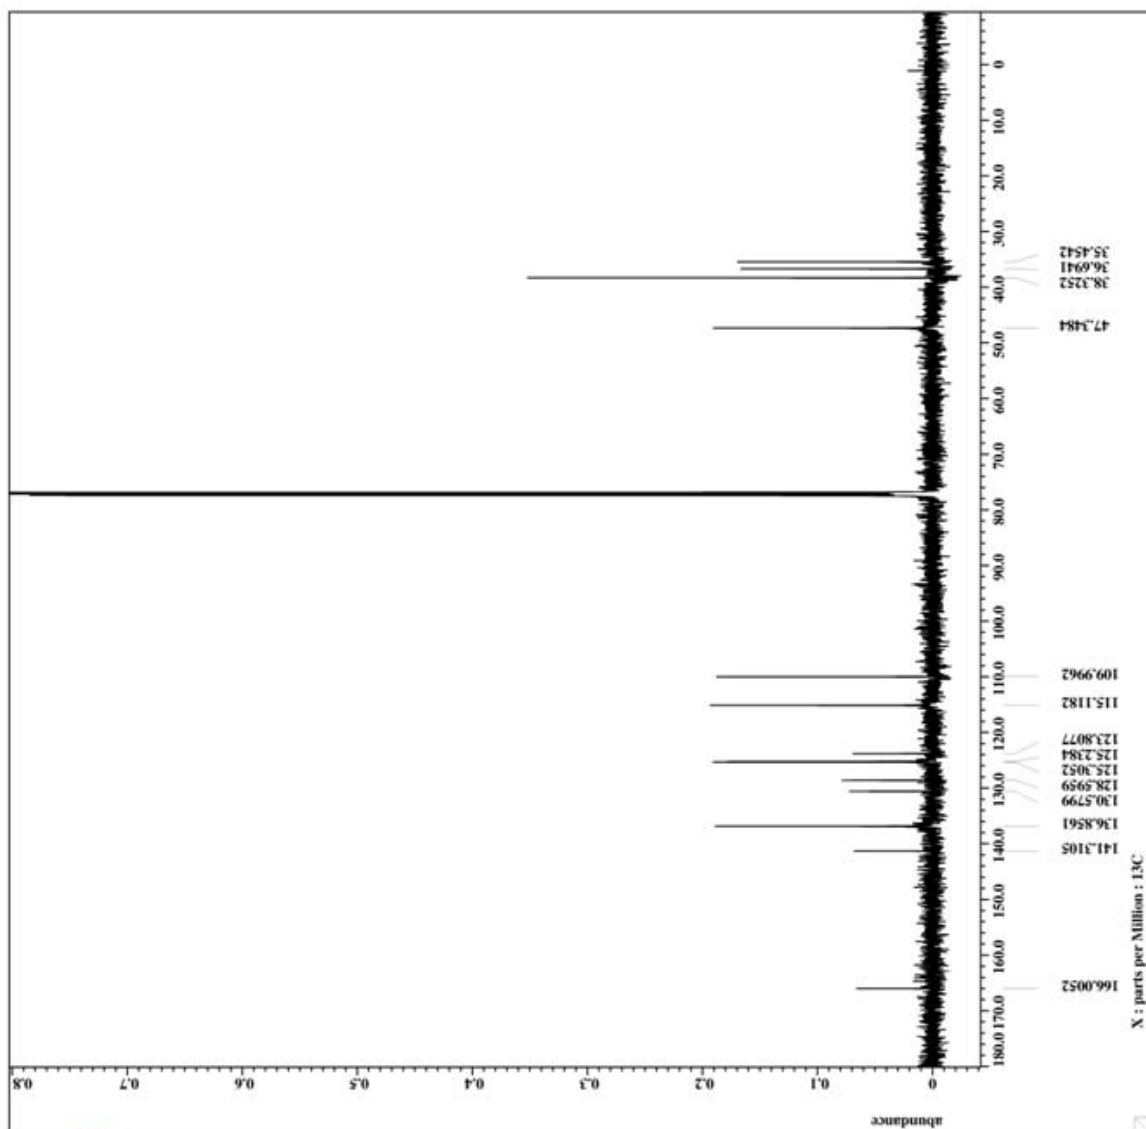





```

Filename = MSB_V_106_methylmethy
Author = delta
Experiment = single_pulse.ex2
Sample_id = S8459203
Solvent = CHLOROFORM-D
Creation_time = 4-OCT-2010 02:42:10
Revision_time = 3-OCT-2010 12:52:50
Current_time = 7-NOV-2010 00:22:55

Comment = single_pulse
Data_format = 1D REAL
Dim_size = 13107
Dim_title = 1H
Dim_units = [ppm]
Dimensions = X
Site = XCA 500
Spectrometer = JNM-ECA500

Field_strength = 11.7473579[T] (500[MH
X_acq_duration = 1.74587904[s]
X_domain = 1H
X_freq = 500.15991521[MHz]
X_offset = 5.0[ppm]
X_points = 16384
X_prescans = 0
X_resolution = 0.5727737[HHz]
X_sweep = 9.38438438[kHz]
X_domain = 1H
Irr_domain = 500.15991521[MHz]
Irr_freq = 500.15991521[MHz]
Irr_offset = 5.0[ppm]
Tri_domain = 1H
Tri_freq = 500.15991521[MHz]
Tri_offset = 5.0[ppm]
Clipped = FALSE
Mod_return = 1
Scans = 16
Total_scans = 16

X_90_width = 12.54[us]
X_acq_time = 1.74587904[s]
X_angle = 45[deg]
X_atn = 6[db]
X_pulse = 6[us]
X_pulse_offset = 0[us]
Tri_mode = Off
Dante_presat = FALSE
Initial_wait = 1[s]
Recvr_gain = 48
Relaxation_delay = 5[s]
Repetition_time = 6.74587904[s]
Temp_get = 22[dc]
  
```

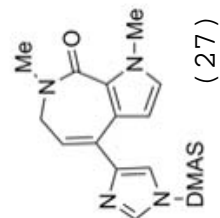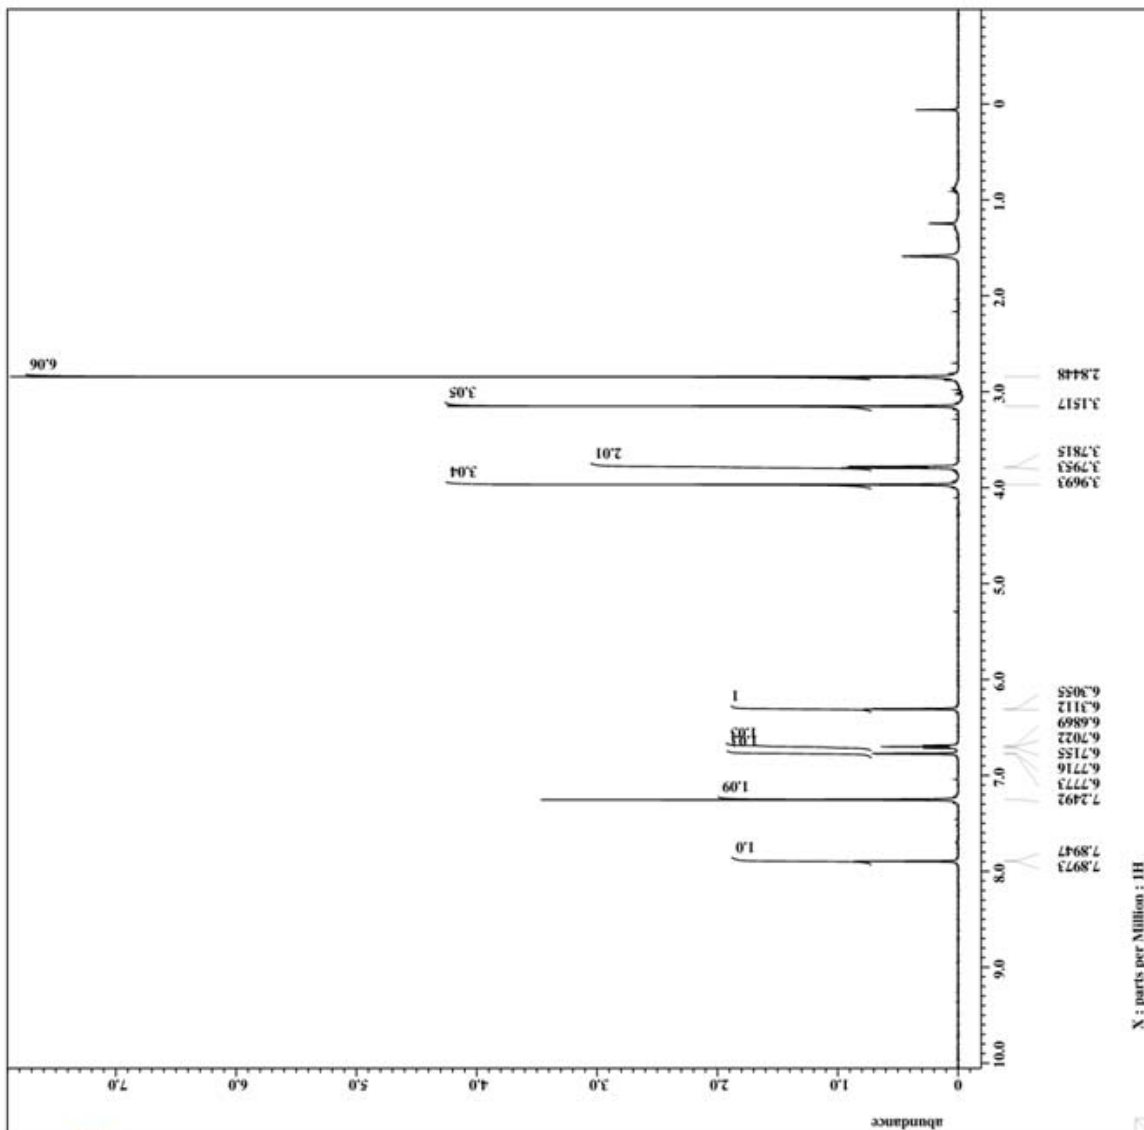





```

=====
Filename      = MSB_V_106_methylmethy
Author        = delta
Experiment    = single_pulse.ex2
Sample_id     = S8459203
Solvent       = CHLOROFORM-D
Creation_time = 4-OCT-2010 02:42:10
Revision_time = 3-OCT-2010 12:52:50
Current_time  = 7-NOV-2010 00:23:23
=====
Comment       = single_pulse
Data_format   = 1D REAL
Dim_size      = 13107
Dim_title     = 1H
Dim_units     = [ppm]
Dimensions    = X
Site          = XCA 500
Spectrometer  = JNM-ECA500
=====
Field_strength = 11.7473579[T] (500[MH
X_acq_duration = 1.74587904[s]
X_domain       = 1H
X_freq         = 500.15991521[MHz]
X_offset       = 5.0[ppm]
X_points       = 16384
X_prescans     = 0
X_resolution   = 0.5727737[Hz]
X_sweep        = 9.38438438[kHz]
X_domain       = 1H
Irr_domain     = 500.15991521[MHz]
Irr_freq       = 5.0[ppm]
Irr_offset     = 18
Tri_domain     = 500.15991521[MHz]
Tri_freq       = 5.0[ppm]
Tri_offset     = 5.0[ppm]
Shipped        = FALSE
Mod_return     = 1
Scans          = 16
Total_scans    = 16
=====
X_90_width     = 12.54[us]
X_acq_time      = 1.74587904[s]
X_angle         = 45[deg]
X_atn          = 6[us]
X_pulse         = 6[us]
Irr_pulse       = Off[us]
Tri_pulse       = Off
Tri_mode        = Off
Dante_presat    = FALSE
Initial_wait    = 1[s]
Recvr_gain      = 48
Relaxation_delay = 5[s]
Repetition_time = 6.74587904[s]
Temp_get        = 22[dc]
=====
  
```

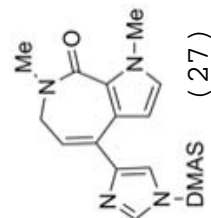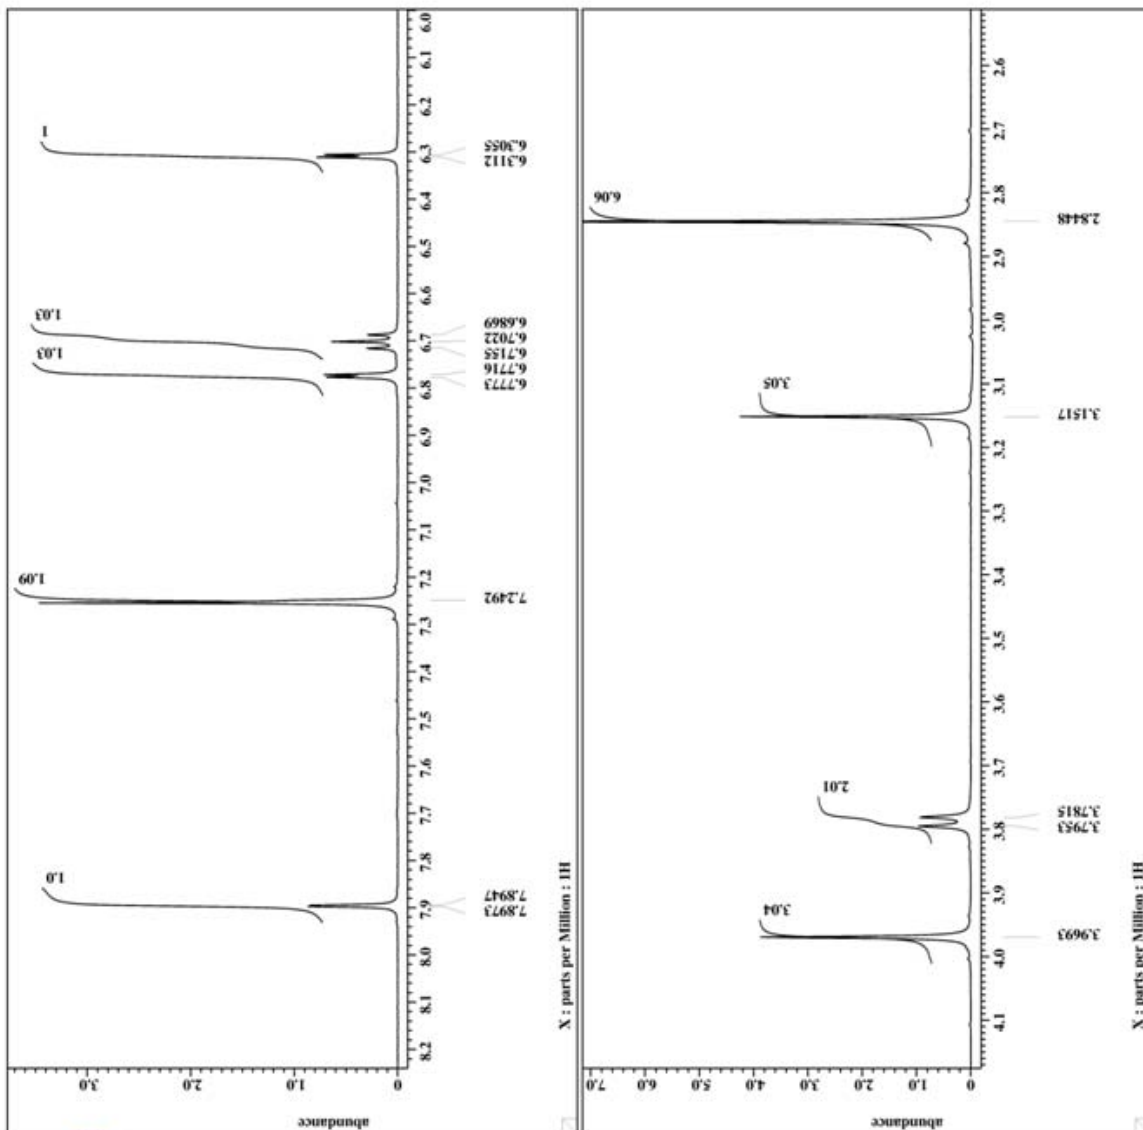



```

Filename = MSB_V_106_methylmethy
Author = delta
Experiment = single_pulse_dec
Sample_id = S8680562
Solvent = CHLOROFORM-D
Creation_time = 30-SEP-2010 08:55:55
Revision_time = 23-SEP-2010 18:58:30
Current_time = 7-NOV-2010 00:23:45

Comment = single pulse decouple
Data_format = 1D REAL
Dim_size = 26214
Dim_title = 13C
Dim_units = [ppm]
Dimensions = X
Site = XCA 500
Spectrometer = JNM-ECA500

Field_strength = 11.7473579[T] (500[MH
X_acq_duration = 0.83361792[s]
X_domain = 13C
X_freq = 125.76529768[MHz]
X_offset = 100[ppm]
X_points = 32768
X_prescans = 1
X_resolution = 1.19959034[Hz]
X_sweep = 39.3081761[kHz]
X_domain = 1H
Irr_freq = 500.15991521[MHz]
Irr_offset = 5.0[ppm]
Clipped = FALSE
Mod_return = 10
Scans = 70
Total_scans = 70

X_90_width = 10.73[us]
X_acq_time = 0.83361792[s]
X_angle = 30[deg]
X_atn = 9[db]
X_pulse = 3.57666667[us]
Irr_atn_dec = 20[db]
Irr_atn_noe = 30[db]
Irr_offset = 5.0[ppm]
Decoupling = TRUE
Initial_wait = 1[s]
Noe_time = TRUE
Noe_time = 2[s]
Recvr_gain = 50
Relaxation_delay = 2[s]
Repetition_time = 2.83361792[s]
Temp_get = 22[dc]
  
```

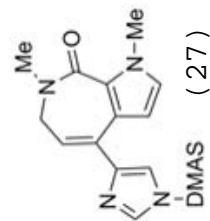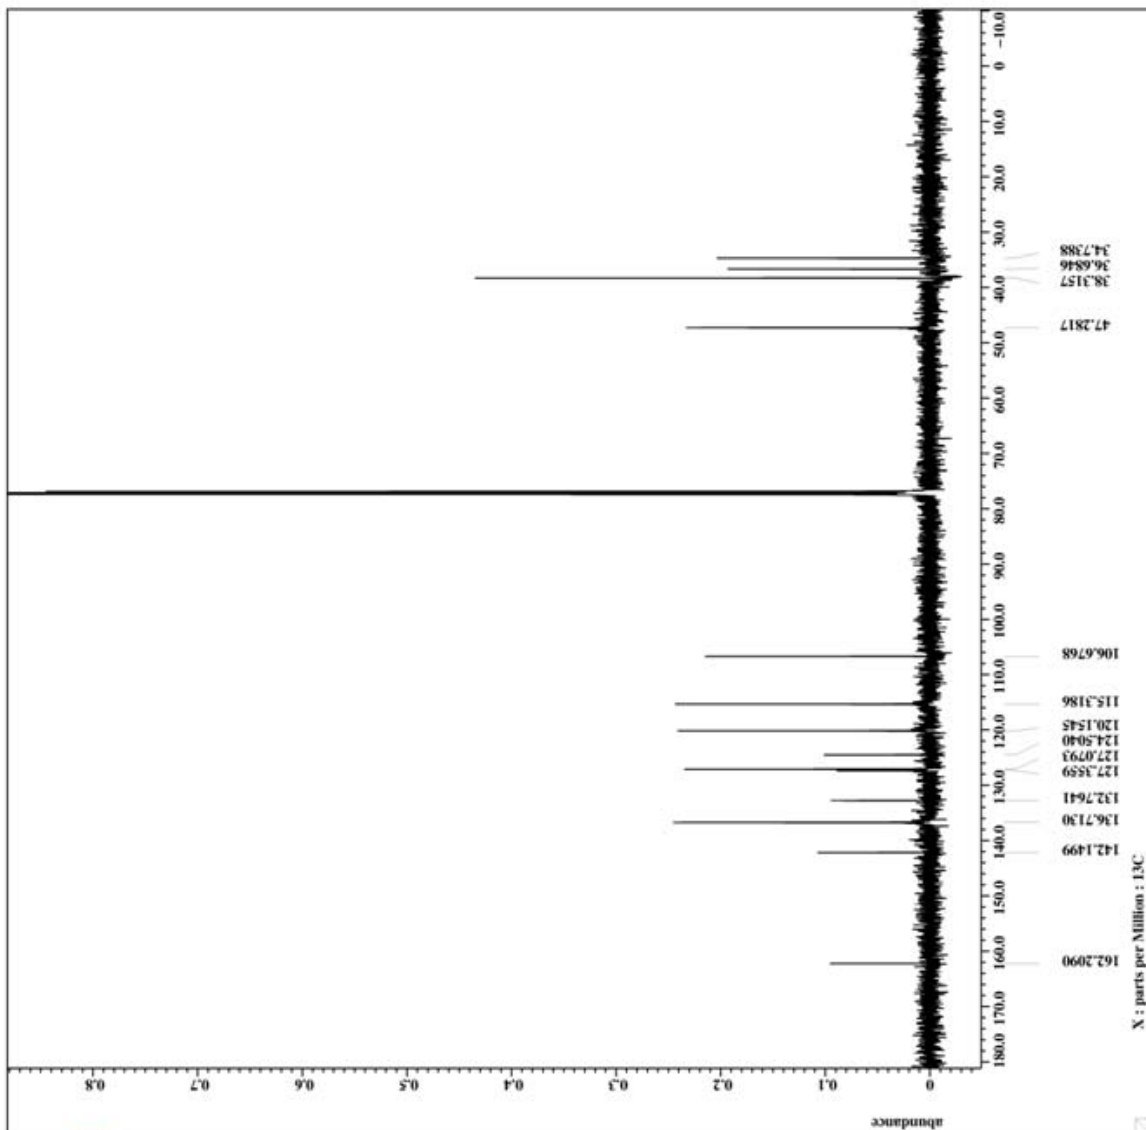



```

Filename = MSB_IV_108_trityldepr
Author = delta
Experiment = single_pulse_exp
Sample_id = S852389
Solvent = CHLOROFORM-D
Creation_time = 25-JUL-2009 04:59:45
Revision_time = 24-JUL-2009 13:26:16
Current_time = 6-NOV-2010 23:54:01

Comment = Single Pulse Experiment
Data_format = 1D REAL
Dim_size = 16384
Dim_title = 1H
Dim_units = [ppm]
Dimensions = X
Site = X
Spectrometer = DELTA 500
Spectrometer = DELTA_NMR

Field_strength = 11.7473579[T] (500[MH]
X_acq_duration = 2.1823488[s]
X_domain = 1H
X_freq = 500.15991521[MHz]
X_offset = 5[ppm]
X_points = 16384
X_resolution = 0.45822189[Hz]
X_sweep = 7.50750751[kHz]
X_sweep = FALSE
Mod_return = 1
Scans = 8
Total_scans = 8
X_90_width = 18.5[us]
X_acq_time = 2.1823488[s]
X_angle = 45[deg]
X_pulse = 9.25[us]
Initial_wait = 1[s]
Phase_preset = 3[us]
Recvr_gain = 18
Relaxation_delay = 4[s]
Temp_get = 27.4[dc]
Unblank_time = 2[us]

```

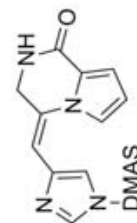

(28)

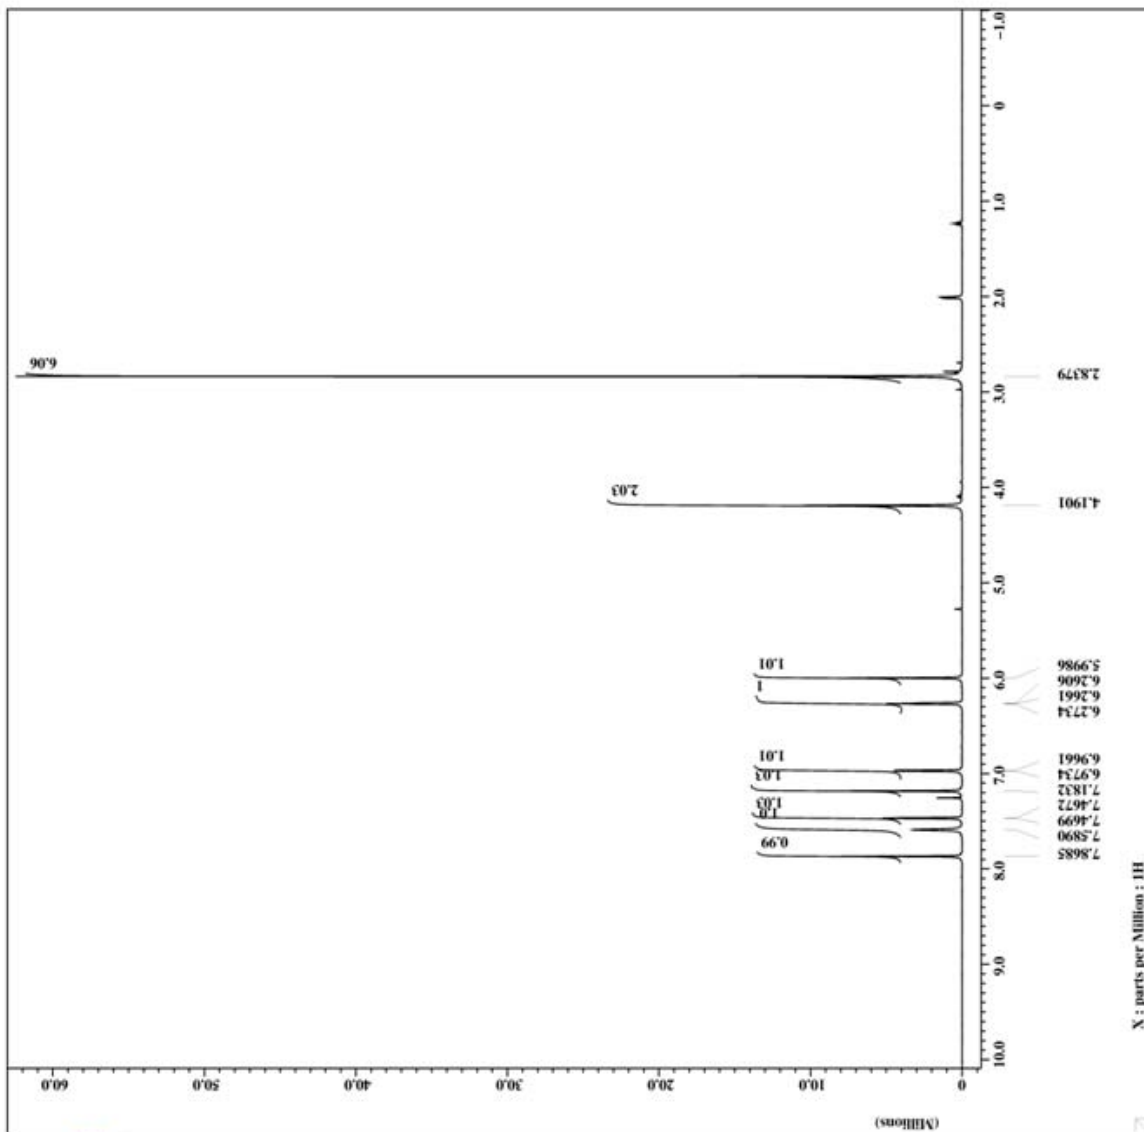



```

Filename = MSB_IV_108_trityldepr
Author = delta
Experiment = single_pulse_dec
Sample_id = S852440
Solvent = CHLOROFORM-D
Creation_time = 25-JUL-2009 05:13:16
Revision_time = 26-OCT-2010 02:08:21
Current_time = 6-NOV-2010 23:54:32

Comment = single pulse decouple
Data_format = 1D COMPLEX
Dim_size = 65536
Dim_title = 13C
Dim_units = [ppm]
Dimensions = X
Site = Eclipse+ 500
Spectrometer = DELTA_NMR

Field_strength = 11.7473579[T] (500[MH]
X_acq_duration = 2.0840448[s]
X_domain = 13C
X_freq = 125.76529768[MHz]
X_offset = 100[ppm]
X_points = 65536
X_prescans = 0
X_resolution = 0.47983613[Hz]
X_resolution2 = 31.44654088[kHz]
X_sweep_rate = 18
Irr_domain = 1H
Irr_freq = 500.15991521[MHz]
Irr_offset = 5[ppm]
Clipped = TRUE
Mod_return = 1
Scans = 115.0
Total_scans = 115.0

X_90_width = 14.2[us]
X_acq_time = 2.0840448[s]
X_angle = 30[deg]
X_pulse = 4.7333333[us]
Initial_wait = 1[s]
Noe_time = 1[s]
Phase_preset = 3[us]
Recvr_gain = 3[s]
Reference = 28[us]
Temp_set_on_delay = 28[us]
Unblank_time = 2[us]

```

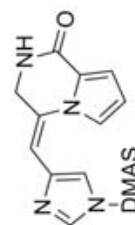

(28)

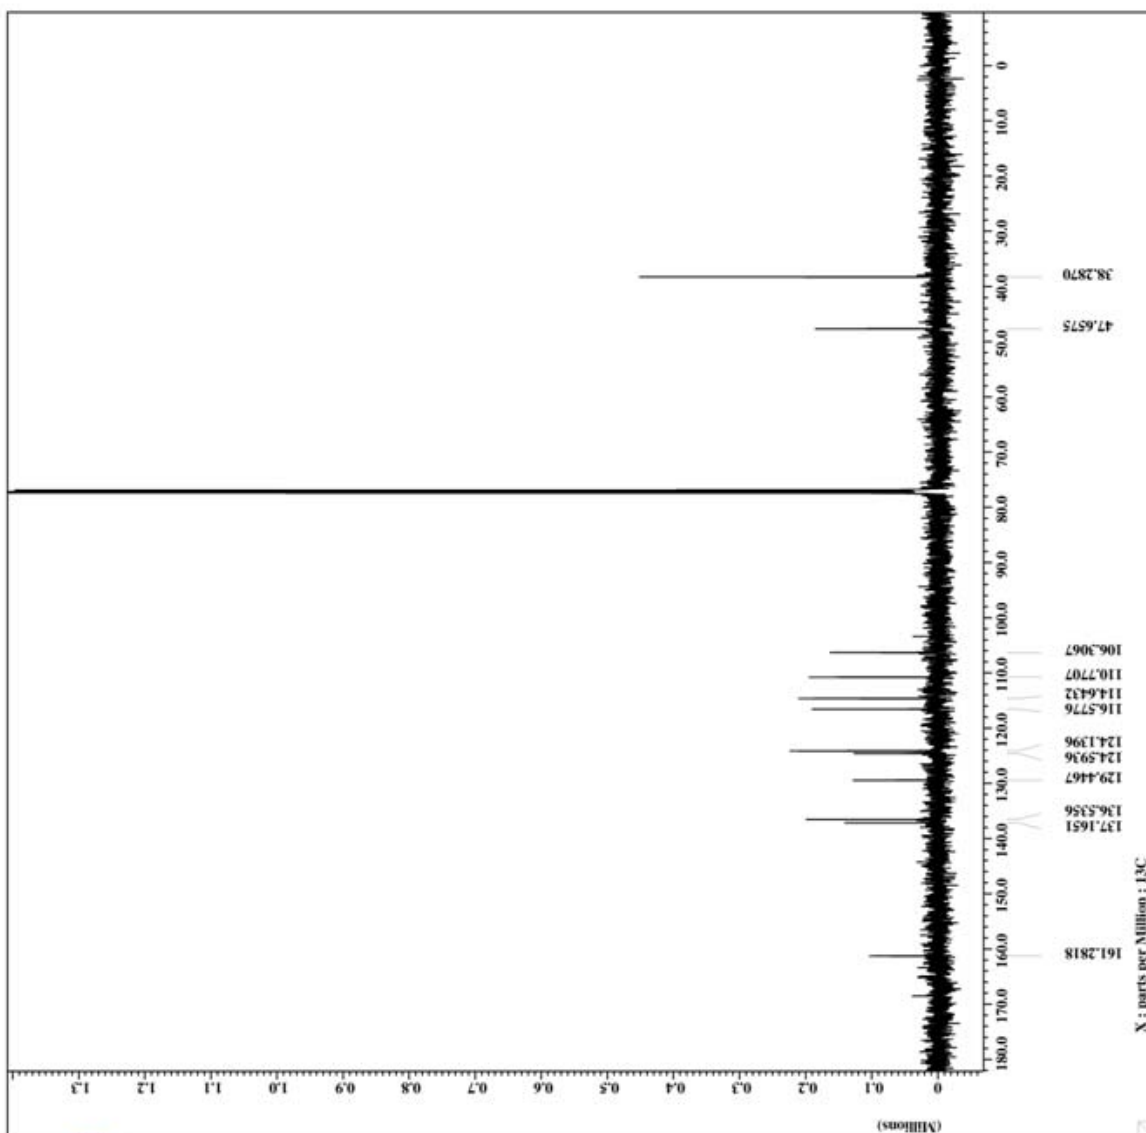

X : parts per Million : 13C

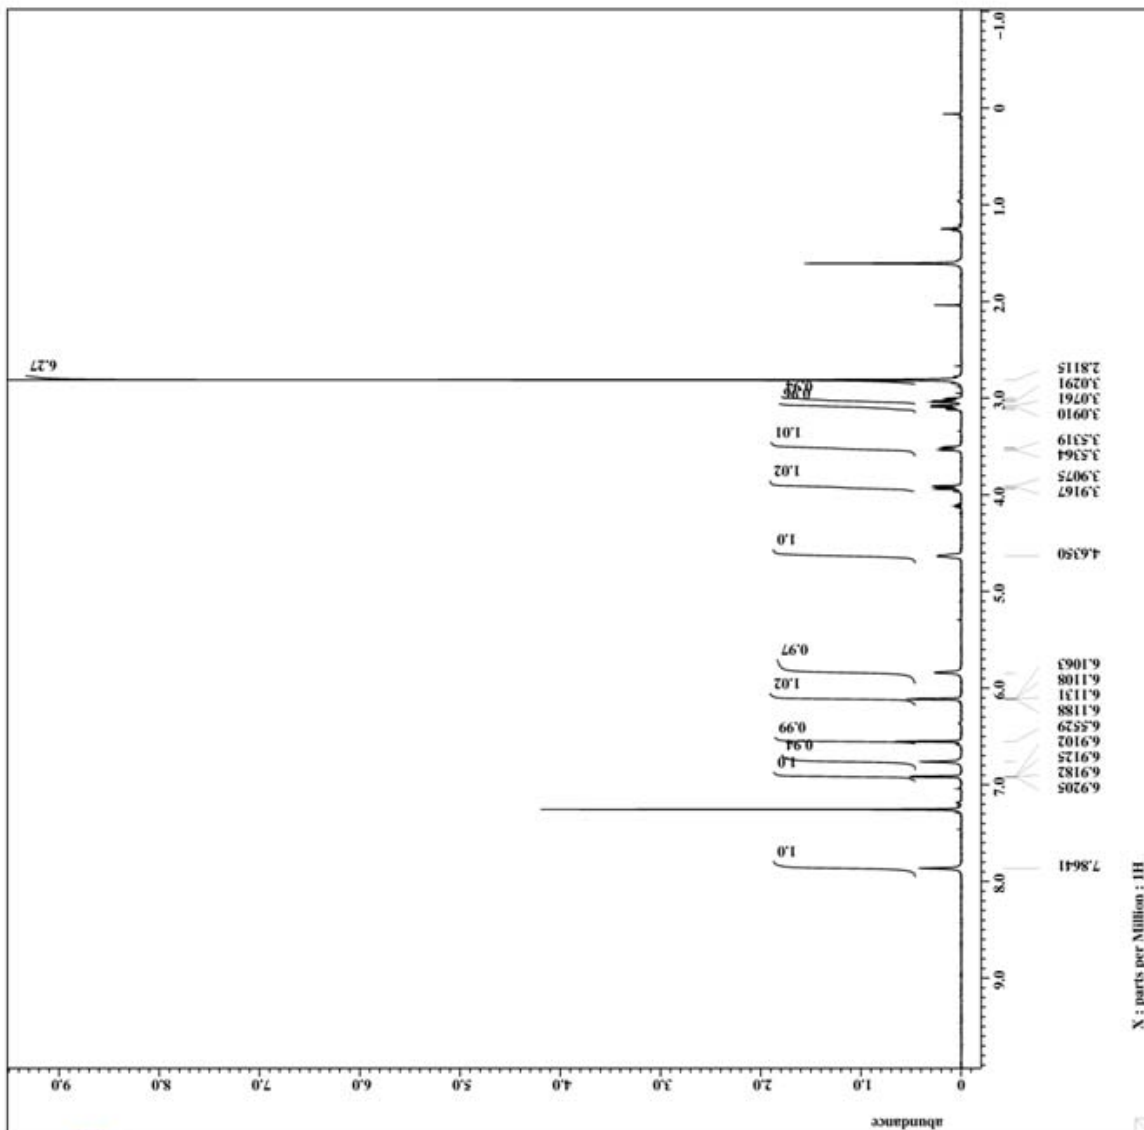



```

Filename = MSB_IV_109_hydrogenat
Author = delta
Experiment = single pulse.ex2
Sample_id = S859052
Solvent = CHLOROFORM-D
Creation_time = 7-OCT-2010 06:18:22
Revision_time = 6-NOV-2010 23:56:15
Current_time = 6-NOV-2010 23:56:29

Comment = single pulse
Data_format = 1D REAL
Dim_size = 13107
Dim_title = 1H
Dim_units = [ppm]
Dimensions = X
Site = XCA 500
Spectrometer = JNM-ECA500

Field_strength = 11.7473579[T] (500[MH]
X_acq_duration = 1.74587904[s]
X_domain = 1H
X_freq = 500.15991521[MHz]
X_offset = 5.0[ppm]
X_points = 16384
X_prescans = 0
X_resolution = 0.5727737[HHz]
X_sweep = 9.38438438[kHz]
X_domain = 1H
Irr_domain = 500.15991521[MHz]
Irr_freq = 500.15991521[MHz]
Irr_offset = 5.0[ppm]
Tri_domain = 1H
Tri_freq = 500.15991521[MHz]
Tri_offset = 5.0[ppm]
Clipped = FALSE
Mod_return = 1
Scans = 16
Total_scans = 16

X_90_width = 12.54[us]
X_acq_time = 1.74587904[s]
X_angle = 45[deg]
X_atn = 6[db]
X_pulse = 6[us]
X_pulse_off = 6[us]
Tri_mode = Off
Dante_preset = FALSE
Initial_wait = 1[s]
Recvr_gain = 50
Relaxation_delay = 5[s]
Repetition_time = 6.74587904[s]
Temp_get = 21.8[dc]
  
```

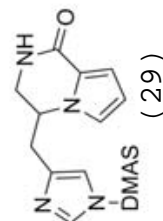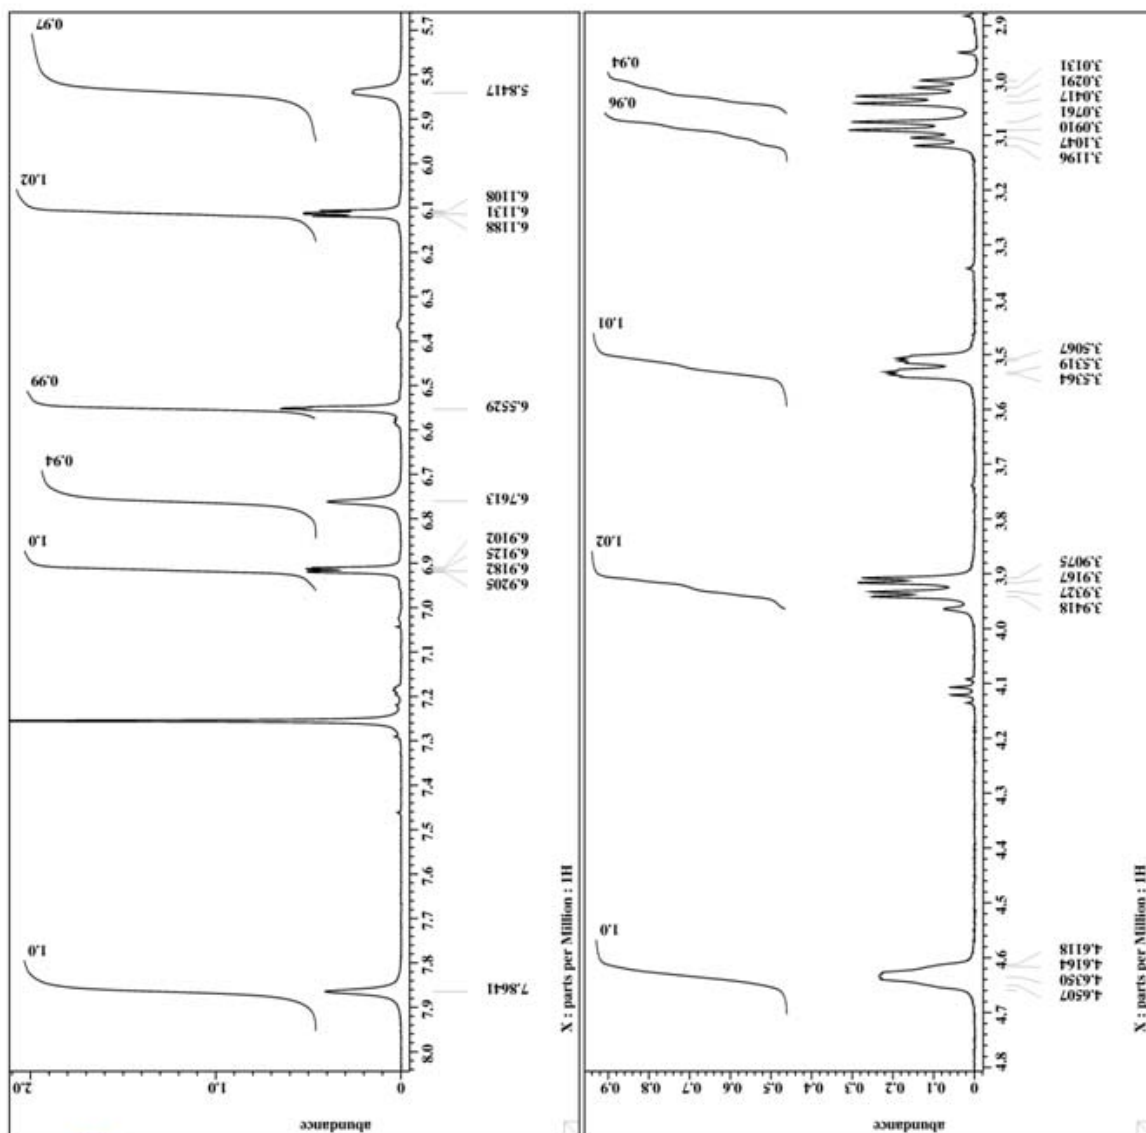



```

Filename = MSB_IV_109_hydrogenat
Author = delta
Experiment = single_pulse_dac
Sample_id = S855005
Solvent = CHLOROFORM-D
Creation_time = 25-JUL-2009 08:51:10
Revision_time = 24-JUL-2009 19:14:36
Current_time = 6-NOV-2010 23:57:31

Comment = single pulse decouple
Data_format = 1D COMPLEX
Data_size = 65536
Dim_size = 13C
Dim_title = [ppm]
Dim_units = X
Dimensions = X
Site = DELTA 500
Spectrometer = DELTA_NMR

Field_strength = 11.7473579[T] (500[MH]
X_acq_duration = 2.0840448[s]
X_domain = 13C
X_freq = 125.76529768[MHz]
X_offset = 100[ppm]
X_points = 65536
X_resolution = 0.47983613[MHz]
X_sweep = 31.44654088[kHz]
X_domain = 1H
Irr_domain = 500.15991521[MHz]
Irr_freq = 5[ppm]
Irr_offset = FALSE
Mod_return = 1
Scans = 1580
Total_scans = 1580

X_90_width = 14.2[us]
X_acq_time = 2.0840448[s]
X_angle = 30[deg]
X_pulse = 4.7333333[us]
Initial_wait = 1[s]
Hoe_time = 1[s]
Phase_preset = 2[us]
Relaxation_delay = 3[s]
Temp_get = 29.5[dC]
Unblank_time = 2[us]

```

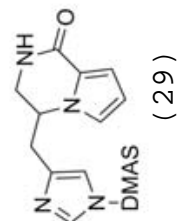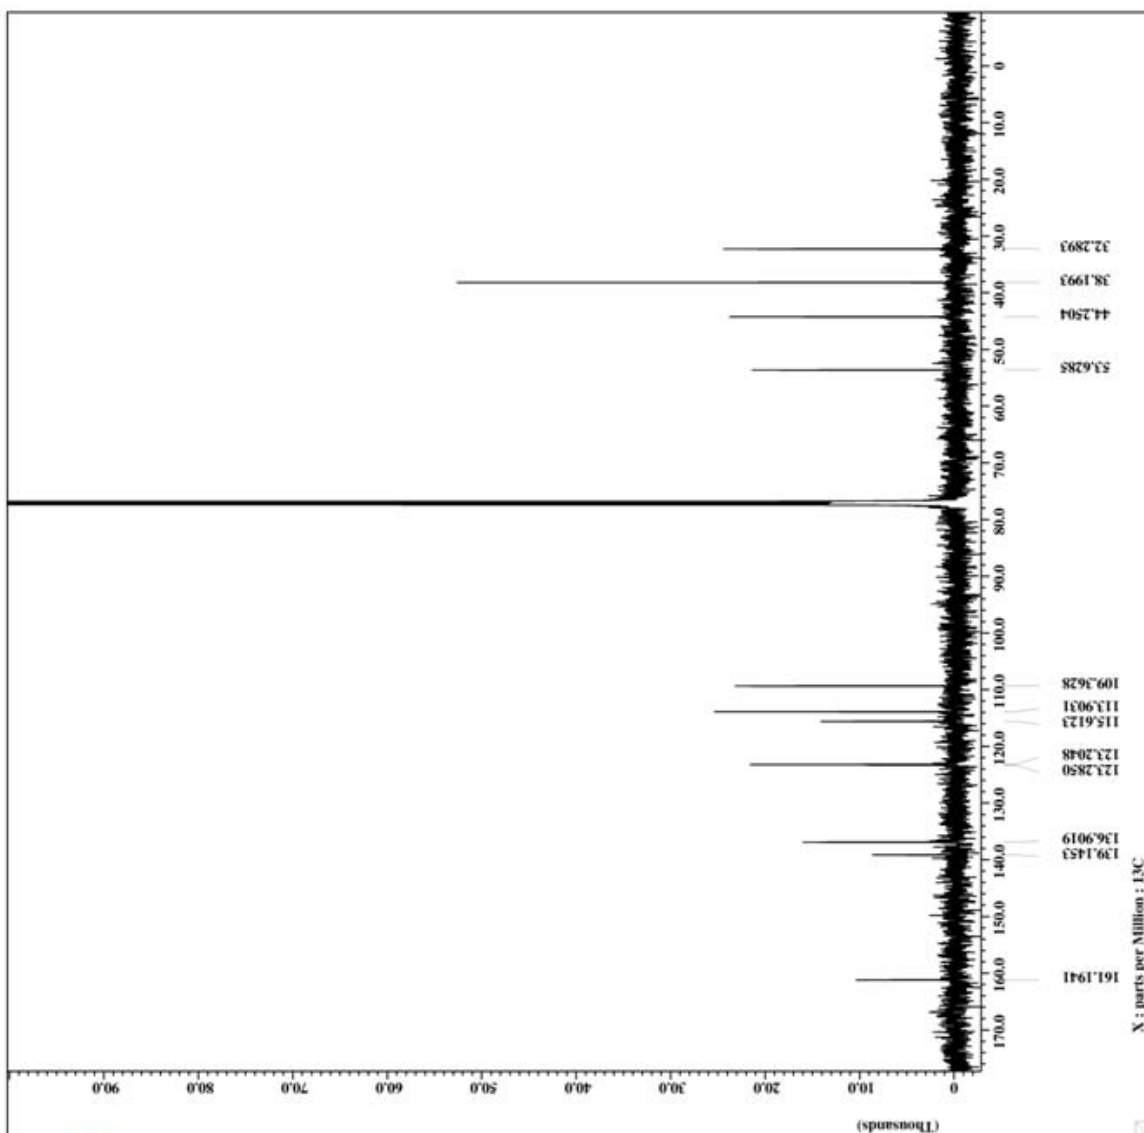

Supplement: Supplementary file 1 [file 4346632]
